# Supplementary material for: 4CzIPN-catalyzed radical-initiated cascade cyclization for the photosynthesis of polysubstituted quinolin-3-amines
Source: Royal Society of Chemistry journal article supplement (doi:10.1039/d3qo00537b), 2023-01-01

## Supplementary Information

*for*

### **4CzIPN-Catalyzed Radical-initiated Cascade Cyclizations for the Photosynthesis of Polysubstituted Quinolin-3-amines**

**Shiqiang Mu<sup>a</sup>, Yu Guo<sup>a</sup>, Xiujuan Huang<sup>a</sup>, Ying Luo<sup>a</sup>, Menghan Chen<sup>a</sup>, Jian Xu\* and Qiuling Song\***

<sup>a</sup>Institute of Next Generation Matter Transformation, College of Material Sciences Engineering at Huaqiao University, 668 Jimei Blvd, Xiamen, Fujian, 361021,

<sup>b</sup>Key Laboratory of Molecule Synthesis and Function Discovery, Fujian Province University, College of Chemistry at Fuzhou University, Fuzhou, 350108, P. R. China.

<sup>c</sup>School of Chemistry and Chemical Engineering, Henan Normal University, Xinxiang, Henan, 453007, \*email: [qsong@hqu.edu.cn](mailto:qsong@hqu.edu.cn)

## Table of Contents

|                                             |    |
|---------------------------------------------|----|
| 1. General information .....                | 3  |
| 2. Experimental procedures:.....            | 4  |
| 3. Optimization of Reaction Conditions..... | 5  |
| 4. Characterization data for products ..... | 7  |
| 5. References .....                         | 18 |
| 6. NMR spectroscopic data .....             | 19 |

## 1. General information

All chemicals were purchased from Adamas Reagent, Energy chemical com.p.any, Bide Pharmatech Ltd, J&K SCIENTIFIC LTD and Shang Fluoro Com.p.any. Unless otherwise stated, all experiments were conducted in a sealed tube under N<sub>2</sub> atmosphere. Reactions were monitored by TLC or GC-MS analysis. Flash column chromatography was performed over silica gel (200-300 mesh). N-acyloxyphthalimides and aryl isonitriles were synthesized according to previously described procedures<sup>1,2, 3,4,5</sup>.

<sup>1</sup>H-NMR and <sup>13</sup>C-NMR spectra were recorded in CDCl<sub>3</sub> and DMSO-d<sub>6</sub> on a Bruker Avance 500 spectrometer (500 MHz <sup>1</sup>H, 125 MHz <sup>13</sup>C (CPD), 470 MHz <sup>19</sup>F) at room tem.p.erature. Chemical shifts were reported in ppm on the scale relative to CDCl<sub>3</sub> ( $\delta = 7.26$  for <sup>1</sup>H-NMR,  $\delta = 77.00$  for <sup>13</sup>C-NMR) as an internal reference. Coupling constants (J) were reported in Hertz (Hz).

## 2. Experimental procedures:

### (1). general procedure 1

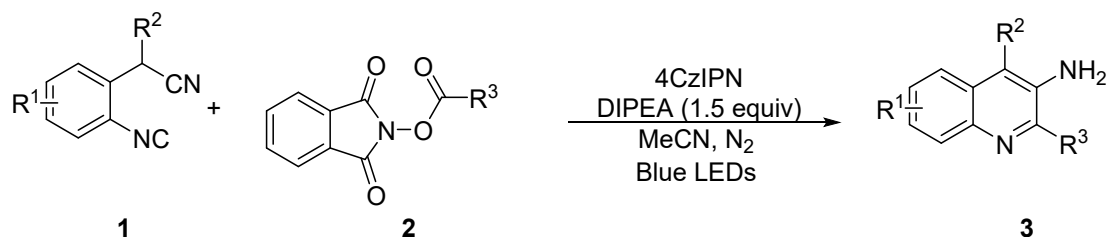

A mixture of **1** (0.4 mmol), **2** (0.6 mmol), 4CzIPN (4 mol%), and DIPEA (1 mmol) were charged into a schleck tube, then the air was removed, N<sub>2</sub> was filled of schleck, CH<sub>3</sub>CN (2 mL) was added to the mixture. The mixture was stirred under irradiation of 5 W Blue LEDs at rt for 24h. After the solvent was removed under reduced pressure, the residue was purified by silica gel chromatography to afford the corresponding product.

### (2). general procedure 2

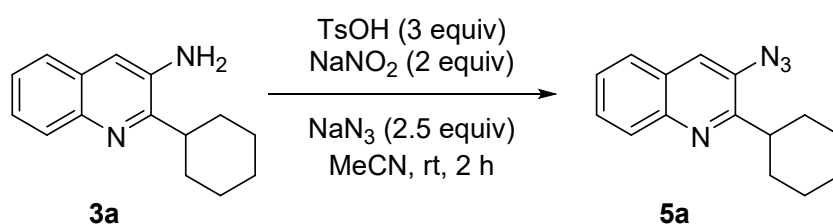

A mixture of **3a** (0.4 mmol), TsOH (1.2 mmol), NaNO<sub>2</sub> (0.6 mmol), NaN<sub>3</sub> (1 mmol), were charged into a schleck tube, then the air was removed, N<sub>2</sub> was filled of schleck, CH<sub>3</sub>CN (2 mL) was added to the mixture. The reaction mixture was stirred at room temperature for 2 h. After the solvent was removed under reduced pressure, the residue was purified by silica gel chromatography to afford the corresponding product.

### (3). general procedure 3

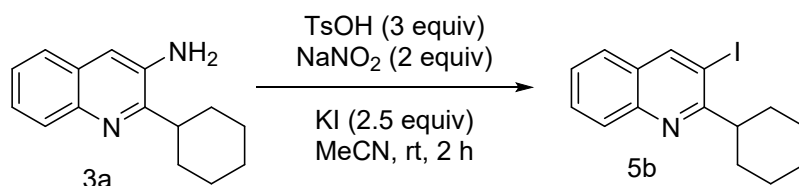

A mixture of **3a** (0.4 mmol), TsOH (1.2 mmol), NaNO<sub>2</sub> (0.6 mmol), KI (1 mmol), were charged into a schleck tube, then the air was removed, N<sub>2</sub> was filled of schleck, CH<sub>3</sub>CN (2 mL) was added to the mixture. The reaction mixture was stirred at room temperature for 2 h. After the solvent was removed under reduced pressure, the residue was purified by silica gel chromatography to afford the corresponding product.

### 3. Optimization of Reaction Conditions

Table S1. Screening of photocatalysts (P.C.) and solvents<sup>a</sup>

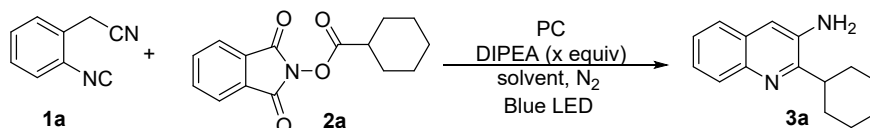

| Entry | DIPEA (x equiv) | PC                                                               | Solvent           | Yield(%) |
|-------|-----------------|------------------------------------------------------------------|-------------------|----------|
| 1     | 1.5             | Eosin-Y                                                          | MeCN              | 59       |
| 2     | 1.5             | Eosin-B                                                          | MeCN              | 48       |
| 3     | 1.5             | fac-Ir(ppy) <sub>3</sub>                                         | MeCN              | 38       |
| 4     | 1.5             | Ir[dF(CF <sub>3</sub> )ppy] <sub>2</sub> (dtbbpy)PF <sub>6</sub> | MeCN              | 40       |
| 5     | 1.5             | Ru(bpy) <sub>3</sub> Cl <sub>2</sub>                             | MeCN              | 26       |
| 6     | 1.5             | 4CzIPN                                                           | MeCN              | 64       |
| 7     | 1.5             | 4CzIPN                                                           | acetone           | 60       |
| 8     | 1.5             | 4CzIPN                                                           | DMSO              | 56       |
| 9     | 1.5             | 4CzIPN                                                           | THF               | 44       |
| 10    | 1.5             | 4CzIPN                                                           | 1,4-dioxane       | trace    |
| 11    | 1.5             | 4CzIPN                                                           | toluene           | trace    |
| 12    | 1.5             | 4CzIPN                                                           | DCM               | 25       |
| 13    | 1.5             | 4CzIPN                                                           | DMF               | 50       |
| 14    | 1.5             | 4CzIPN                                                           | CHCl <sub>3</sub> | 28       |
| 15    | 1.5             | 4CzIPN                                                           | EA                | trace    |

Reaction conditions: <sup>a</sup> The reaction was carried out with **1a** (0.4 mmol), **2a** (0.6 mmol), PC (4 mol%), and DIPEA in the solvent (2 mL), under irradiation of blue LED with N<sub>2</sub> protection at rt for 24h.

**Table S2. Further screening of reaction conditions**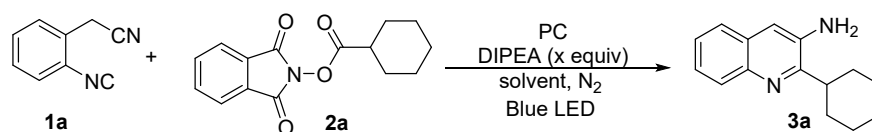

| Entry | DIPEA (x equiv) | PC     | Additive                         | Solvent | Yield(%) |
|-------|-----------------|--------|----------------------------------|---------|----------|
| 1     | 1.0             | 4CzIPN | -                                | MeCN    | 44       |
| 2     | 1.5             | 4CzIPN | -                                | MeCN    | 64       |
| 3     | 2               | 4CzIPN | -                                | MeCN    | 73       |
| 4     | 2.5             | 4CzIPN | -                                | MeCN    | 76       |
| 5     | 3               | 4CzIPN | -                                | MeCN    | 70       |
| 6     | 2.5             | 4CzIPN | Cs <sub>2</sub> CO <sub>3</sub>  | MeCN    | 56       |
| 7     | 2.5             | 4CzIPN | CsF                              | MeCN    | 42       |
| 8     | 2.5             | 4CzIPN | <sup>t</sup> BuONa               | MeCN    | 48       |
| 9     | 2.5             | 4CzIPN | KOMe                             | MeCN    | 50       |
| 10    | 2.5             | 4CzIPN | Na <sub>2</sub> HPO <sub>4</sub> | MeCN    | 46       |
| 11    | 2.5             | 4CzIPN | Na <sub>2</sub> CO <sub>3</sub>  | MeCN    | 50       |
| 12    | 2.5             | 4CzIPN | KOAc                             | MeCN    | 48       |
| 13    | 2.5             | 4CzIPN | H <sub>2</sub> O                 | MeCN    | trace    |
| 14    | 2.5             | 4CzIPN | PhSH                             | MeCN    | 36       |
| 15    | 2.5             | 4CzIPN | MgSO <sub>4</sub>                | MeCN    | 60       |

Reaction conditions: <sup>a</sup> The reaction was carried out with **1a** (0.4 mmol), **2a** (0.6 mmol), PC (4 mol%), and DIPEA in the solvent (2 mL), under irradiation of blue LED with N<sub>2</sub> protection at rt for 24h.

## 4. Characterization data for products

### 2-cyclohexylquinolin-3-amine(3a)

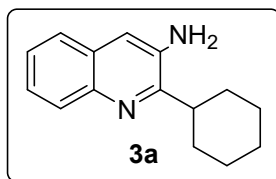

Following the **general procedure 1**, white solid (m.p.: 77 – 79 °C), yield: 76%.

**<sup>1</sup>H NMR (500 MHz, CDCl<sub>3</sub>)** δ 8.00 (d, *J* = 8.3 Hz, 1H), 7.57 – 7.53 (m, 1H), 7.45 – 7.41 (m, 1H), 7.40 – 7.35 (m, 1H), 7.16 (s, 1H), 3.88 (s, 2H), 2.87 – 2.78 (m, 1H), 2.04 – 1.76 (m, 8H), 1.46 – 1.41 (m, 2H).

**<sup>13</sup>C NMR (125 MHz, CDCl<sub>3</sub>)** δ 156.2, 142.6, 137.8, 128.7, 128.3, 126.0, 125.4, 125.3, 116.0, 41.3, 31.1, 26.8, 26.2.

**HRMS (ESI) m/z:** [M+H]<sup>+</sup> Calcd. for C<sub>15</sub>H<sub>19</sub>N<sub>2</sub><sup>+</sup> 227.1543; Found:227.1538.

### 2-(1-methylcyclohexyl)quinolin-3-amine(3b)

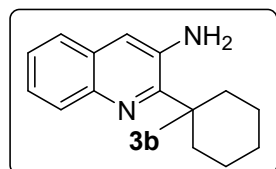

Following the **general procedure 1**, white solid (m.p.: 95 – 98 °C), yield: 88%.

**<sup>1</sup>H NMR (500 MHz, CDCl<sub>3</sub>)** δ 8.00 (d, *J* = 8.3 Hz, 1H), 7.57 – 7.53 (m, 1H), 7.45 – 7.41 (m, 1H), 7.40 – 7.35 (m, 1H), 7.16 (s, 1H), 3.88 (s, 2H), 2.87 – 2.78 (m, 2H), 2.04 – 1.76 (m, 8H), 1.46 – 1.41 (m, 3H).

**<sup>13</sup>C NMR (125 MHz, CDCl<sub>3</sub>)** δ 156.5, 141.9, 138.8, 129.2, 128.1, 126.1, 125.2, 124.8, 118.1, 42.0, 36.9, 26.5, 24.9, 23.0.

**HRMS (ESI) m/z:** [M+H]<sup>+</sup> Calcd. for C<sub>16</sub>H<sub>21</sub>N<sub>2</sub><sup>+</sup> 241.1699; Found:241.1704.

### 2-cyclopentylquinolin-3-amine(3c)

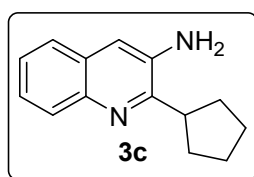

Following the **general procedure 1**, white solid (m.p.: 107 – 108 °C), yield: 47%.

**<sup>1</sup>H NMR (500 MHz, CDCl<sub>3</sub>)** δ 8.00 (d, *J* = 8.3 Hz, 1H), 7.57 – 7.53 (m, 1H), 7.45 – 7.41 (m, 1H), 7.40 – 7.35 (m, 1H), 7.16 (s, 1H), 3.88 (s, 2H), 2.87 – 2.78 (m, 1H), 2.04 – 1.76 (m, 8H).

**<sup>13</sup>C NMR (125 MHz, CDCl<sub>3</sub>)** δ 155.2, 142.3, 138.3, 128.8, 128.3, 125.8, 125.2, 125.1, 115.4, 42.4, 30.9, 25.8.

**HRMS (ESI) m/z:** [M+H]<sup>+</sup> Calcd. for C<sub>14</sub>H<sub>17</sub>N<sub>2</sub><sup>+</sup> 213.1386; Found:213.1390.

### 2-cyclobutylquinolin-3-amine(3d)

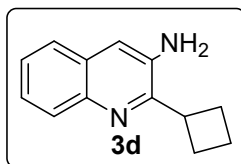

Following the **general procedure 1**, white solid (m.p.: 90 – 92 °C), yield: 48%.

**<sup>1</sup>H NMR (500 MHz, CDCl<sub>3</sub>)** δ 8.00 (d, *J* = 8.3 Hz, 1H), 7.57 – 7.53 (m, 1H), 7.45 – 7.41 (m, 1H), 7.40 – 7.35 (m, 1H), 7.16 (s, 1H), 3.88 (s, 2H), 2.87 – 2.78 (m, 1H), 2.04 – 1.76 (m, 4H), 1.46 – 1.41 (m, 2H).

**<sup>13</sup>C NMR (125 MHz, CDCl<sub>3</sub>)** δ 154.1, 142.3, 138.0, 128.8, 128.6, 126.0, 125.3, 125.3, 115.1, 38.4, 26.1, 18.4.

**HRMS (ESI) m/z:** [M+H]<sup>+</sup> Calcd. for C<sub>13</sub>H<sub>15</sub>N<sub>2</sub><sup>+</sup> 199.1230; Found: 199.1231.

### 2-(1-methylcyclopropyl)quinolin-3-amine(3e)

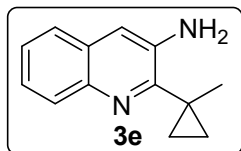

Following the **general procedure 1**, white solid (m.p.: 113 – 116 °C), yield: 71%.

**<sup>1</sup>H NMR (500 MHz, CDCl<sub>3</sub>)** δ 8.01 – 7.97 (m, 1H), 7.60 – 7.56 (m, 1H), 7.46 – 7.37 (m, 2H), 7.24 (s, 1H), 4.25 (s, 2H), 1.52 (s, 3H), 1.14 – 1.09 (m, 2H), 0.94 – 0.91 (m, 2H).

**<sup>13</sup>C NMR (125 MHz, CDCl<sub>3</sub>)** δ 153.9, 142.1, 139.1, 128.9, 128.7, 126.3, 125.3, 125.2, 115.5, 22.1, 20.7, 13.0.

**HRMS (ESI) m/z:** [M+H]<sup>+</sup> Calcd. for C<sub>13</sub>H<sub>15</sub>N<sub>2</sub><sup>+</sup> 199.1230; Found: 199.1226.

### 2-(2,2,3,3-tetramethylcyclopropyl)quinolin-3-amine(3f)

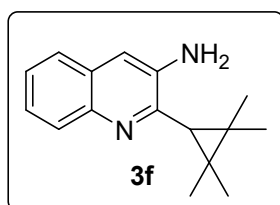

Following the **general procedure 1**, white solid (m.p.: 132 – 134 °C), yield: 52%.

**<sup>1</sup>H NMR (500 MHz, CDCl<sub>3</sub>)** δ 7.91 (d, *J* = 8.0 Hz, 1H), 7.57 – 7.52 (m, 1H), 7.43 – 7.33 (m, 2H), 7.19 (s, 1H), 3.96 (s, 2H), 1.39 (s, 6H), 1.26 (d, *J* = 1.9 Hz, 1H), 1.13 (s, 6H).

**<sup>13</sup>C NMR (125 MHz, CDCl<sub>3</sub>)** δ 151.0, 142.1, 140.4, 129.0, 128.3, 126.0, 125.1, 124.9, 114.1, 24.6, 23.7, 18.3.

**HRMS (ESI) m/z:** [M+H]<sup>+</sup> Calcd. for C<sub>16</sub>H<sub>21</sub>N<sub>2</sub><sup>+</sup> 241.1699; Found: 241.1704.

### 2-(1-phenylcyclopropyl)quinolin-3-amine(3g)



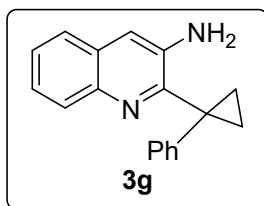

Following the **general procedure 1**, white solid (m.p.: 111 – 113 °C), yield: 65%.

**<sup>1</sup>H NMR (500 MHz, CDCl<sub>3</sub>)** δ 8.06 (d, *J* = 8.2 Hz, 1H), 7.64 – 7.60 (m, 1H), 7.51 – 7.42 (m, 2H), 7.26 (d, *J* = 7.1 Hz, 3H), 7.19 (t, *J* = 7.3 Hz, 1H), 7.11 (d, *J* = 7.7 Hz, 2H), 4.00 (s, 2H), 1.69 – 1.64 (m, 2H), 1.56 – 1.51 (m, 2H).

**<sup>13</sup>C NMR (125 MHz, CDCl<sub>3</sub>)** δ 152.1, 142.2, 142.1, 139.7, 129.2, 129.0, 128.7, 126.5, 126.2, 125.5, 125.4, 125.2, 115.9, 28.6, 16.4.

**HRMS (ESI) m/z:** [M+H]<sup>+</sup> Calcd. for C<sub>18</sub>H<sub>17</sub>N<sub>2</sub><sup>+</sup> 261.1386; Found: 261.1383.

### 2-(tetrahydro-2H-pyran-4-yl)quinolin-3-amine(3h)

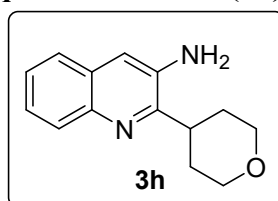

Following the **general procedure 1**, white solid (m.p.: 148 – 150 °C), yield: 78%.

**<sup>1</sup>H NMR (500 MHz, CDCl<sub>3</sub>)** δ 7.94 (d, *J* = 8.2 Hz, 1H), 7.59 – 7.55 (m, 1H), 7.46 – 7.36 (m, 2H), 7.23 (s, 1H), 4.21 – 4.13 (m, 2H), 3.87 (s, 2H), 3.62 (td, *J* = 11.9, 2.0 Hz, 2H), 3.13 – 3.03 (m, 1H), 2.28 – 2.16 (m, 2H), 1.92 – 1.85 (m, 2H).

**<sup>13</sup>C NMR (125 MHz, CDCl<sub>3</sub>)** δ 153.9, 142.7, 137.5, 128.9, 128.3, 126.1, 125.5, 125.2, 116.3, 68.1, 38.5, 30.6.

**HRMS (ESI) m/z:** [M+H]<sup>+</sup> Calcd. for C<sub>14</sub>H<sub>17</sub>N<sub>2</sub>O<sup>+</sup> 229.1335; Found: 229.1338.

### 2-methylquinolin-3-amine(3i)

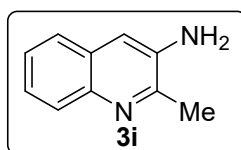

Following the **general procedure 1**, white solid (m.p.: 94 – 96 °C), yield: 62%.

**<sup>1</sup>H NMR (500 MHz, DMSO-*d*<sub>6</sub>)** δ 7.74 – 7.70 (m, 1H), 7.59 – 7.55 (m, 1H), 7.34 – 7.28 (m, 2H), 7.17 (s, 1H), 5.40 (s, 2H), 2.49 (s, 3H).

**<sup>13</sup>C NMR (125 MHz, DMSO-*d*<sub>6</sub>)** δ 150.1, 141.4, 141.2, 129.4, 128.2, 125.9, 125.5, 124.3, 112.5, 22.0.

**HRMS (ESI) m/z:** [M+H]<sup>+</sup> Calcd. for C<sub>10</sub>H<sub>11</sub>N<sub>2</sub><sup>+</sup> 159.0917; Found: 159.0919.

### 2-isopropylquinolin-3-amine(3j)

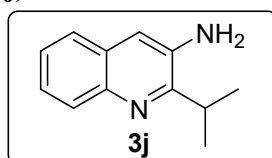

Following the **general procedure 1**, white solid (m.p.: 98 – 100 °C), yield: 68%.

**<sup>1</sup>H NMR (500 MHz, CDCl<sub>3</sub>)** δ 7.97 – 7.93 (m, 1H), 7.58 – 7.54 (m, 1H), 7.45 – 7.35 (m, 2H), 7.20 (s, 1H), 3.88 (d, *J* = 11.4 Hz, 2H), 3.26 – 3.17 (m, 1H), 1.42 (d, *J* = 6.8 Hz, 6H).

**<sup>13</sup>C NMR (125 MHz, CDCl<sub>3</sub>)** δ 156.7, 142.6, 137.6, 128.8, 128.3, 125.9, 125.3, 125.2, 115.8, 30.8, 20.8.

**HRMS (ESI) m/z:** [M+H]<sup>+</sup> Calcd. for C<sub>12</sub>H<sub>15</sub>N<sub>2</sub><sup>+</sup> 187.1230; Found: 187.1232.

### 2-(tert-butyl)quinolin-3-amine(3k)

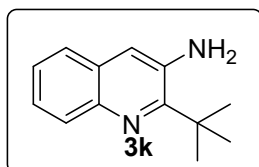

Following the **general procedure 1**, red oil liquid, yield: 78%.

**<sup>1</sup>H NMR (500 MHz, CDCl<sub>3</sub>)** δ 8.05 (d, *J* = 8.3 Hz, 1H), 7.66 – 7.61 (m, 1H), 7.54 – 7.44 (m, 2H), 7.26 (s, 1H), 4.09 (s, 2H), 1.65 (s, 9H).

**<sup>13</sup>C NMR (125 MHz, CDCl<sub>3</sub>)** δ 157.3, 141.9, 138.8, 129.3, 128.6, 126.3, 125.5, 125.0, 118.1, 38.6, 29.0.

**HRMS (ESI) m/z:** [M+H]<sup>+</sup> Calcd. for C<sub>13</sub>H<sub>17</sub>N<sub>2</sub><sup>+</sup> 201.1386; Found: 201.1389.

### 2-(tert-pentyl)quinolin-3-amine(3l)

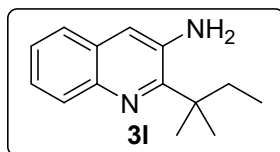

Following the **general procedure 1**, brown oil liquid, yield: 81%.

**<sup>1</sup>H NMR (500 MHz, CDCl<sub>3</sub>)** δ 7.99 (d, *J* = 8.2 Hz, 1H), 7.59 (d, *J* = 7.9 Hz, 1H), 7.48 – 7.39 (m, 2H), 7.18 (s, 1H), 4.00 (s, 2H), 2.03 – 1.96 (m, 2H), 1.58 (d, *J* = 1.6 Hz, 6H), 0.85 – 0.79 (m, 3H).

**<sup>13</sup>C NMR (125 MHz, CDCl<sub>3</sub>)** δ 156.3, 141.9, 139.0, 129.3, 128.3, 126.1, 125.2, 124.8, 117.6, 42.3, 33.3, 27.2, 9.5.

**HRMS (ESI) m/z:** [M+H]<sup>+</sup> Calcd. for C<sub>14</sub>H<sub>19</sub>N<sub>2</sub><sup>+</sup> 215.1543; Found: 215.1539.

### 2-(4-methylpentyl)quinolin-3-amine(3m)

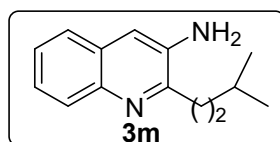

Following the **general procedure 1**, white solid, (m.p.: 116 – 118 °C), yield: 57%.

**<sup>1</sup>H NMR (500 MHz, CDCl<sub>3</sub>)** δ 7.96 – 7.92 (m, 1H), 7.59 – 7.54 (m, 1H), 7.45 – 7.35 (m, 2H), 7.21 (d, *J* = 0.7 Hz, 1H), 3.85 (s, 2H), 2.94 – 2.85 (m, 2H), 1.80 – 1.66 (m, 3H), 1.01 (d, *J* = 6.3 Hz, 6H).

**<sup>13</sup>C NMR (125 MHz, CDCl<sub>3</sub>)** δ 153.0, 142.5, 138.2, 128.6, 128.4, 125.9, 125.5, 125.3, 115.7, 36.3, 32.8, 28.4, 22.5.

**HRMS (ESI) m/z:** [M+H]<sup>+</sup> Calcd. for C<sub>14</sub>H<sub>19</sub>N<sub>2</sub><sup>+</sup> 216.1699; Found: 216.1697.

### 2-(tert-pentyl)quinolin-3-amine (3n)

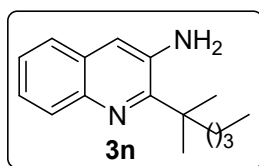

Following the **general procedure 1**, white solid, (m.p.: 118–119 °C), yield: 63%.

**<sup>1</sup>H NMR (500 MHz, CDCl<sub>3</sub>)** δ 7.96 – 7.92 (m, 1H), 7.57 – 7.53 (m, 1H), 7.49 – 7.38 (m, 2H), 7.15 (d, 1H), 3.99 (s, 2H), 1.93 – 1.87 (m, 2H), 1.55 (d, *J* = 0.9 Hz, 6H), 1.30–1.26 (m, 2H), 1.15 – 1.07 (m, 2H), 0.84 (t, 3H).

**<sup>13</sup>C NMR (125 MHz, CDCl<sub>3</sub>)** δ 156.5, 141.9, 138.9, 129.3, 128.3, 126.1, 125.2, 124.8, 117.5, 42.0, 40.7, 27.7, 27.3, 23.5, 14.0.

**HRMS (ESI) m/z:** [M+H]<sup>+</sup> Calcd. for C<sub>16</sub>H<sub>23</sub>N<sub>2</sub><sup>+</sup> 243.1856; Found: 243.1859.

### 2-(2-methyl-1-phenylpropan-2-yl)quinolin-3-amine(3o)

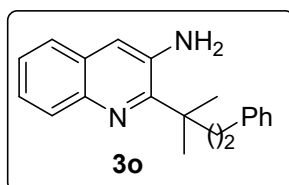

Following the **general procedure 1**, white solid, (m.p.: 110 – 112 °C), yield: 64%.

**<sup>1</sup>H NMR (500 MHz, CDCl<sub>3</sub>)** δ 7.98 (d, *J* = 8.3 Hz, 1H), 7.57 – 7.53 (m, 1H), 7.49 – 7.38 (m, 2H), 7.27 – 7.22 (m, 2H), 7.20 (s, 1H), 7.19 – 7.13 (m, 3H), 4.08 – 3.92 (m, 2H), 2.50 – 2.40 (m, 2H), 2.28 – 2.18 (m, 2H), 1.62 (s, 6H).

**<sup>13</sup>C NMR (125 MHz, CDCl<sub>3</sub>)** δ 155.8, 143.2, 138.9, 129.2, 128.4, 128.3, 126.2, 125.6, 125.4, 124.8, 43.4, 42.1, 31.7, 27.6.

**HRMS (ESI) m/z:** [M+H]<sup>+</sup> Calcd. for C<sub>20</sub>H<sub>23</sub>N<sub>2</sub><sup>+</sup> 290.1783; Found: 290.1785.

### 2-hexylquinolin-3-amine(3p)

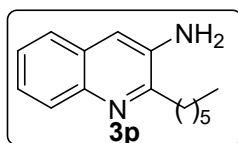

Following the **general procedure 1**, white solid, (m.p.: 119 – 120 °C), yield: 53%.

**<sup>1</sup>H NMR (500 MHz, CDCl<sub>3</sub>)** δ 7.96 (d, *J* = 8.3 Hz, 1H), 7.61 – 7.56 (m, 1H), 7.47 – 7.37 (m, 2H), 7.23 (s, 1H), 3.88 (s, 2H), 2.95 – 2.85 (m, 2H), 1.88 – 1.79 (m, 2H), 1.49 (q, *J* = 7.3 Hz, 2H), 1.40 – 1.33 (m, 4H), 0.92 (t, *J* = 6.8 Hz, 3H).

**<sup>13</sup>C NMR (125 MHz, CDCl<sub>3</sub>)** δ 152.9, 142.6, 138.3, 128.6, 128.5, 126.0, 125.5, 125.3, 115.7, 34.8, 31.8, 29.5, 27.5, 22.6, 14.1.

**HRMS (ESI) m/z:** [M+H]<sup>+</sup> Calcd. for C<sub>15</sub>H<sub>21</sub>N<sub>2</sub><sup>+</sup> 229.1699; Found: 229.1701.

### 2-(3,3,3-trifluoropropyl)quinolin-3-amine(3q)



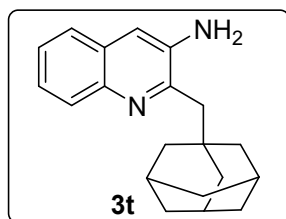

Following the **general procedure 1**, white solid, (m.p.: 140 – 142 °C), yield:55%.

**<sup>1</sup>H NMR (500 MHz, CDCl<sub>3</sub>)** δ 7.97 (d, *J* = 8.3 Hz, 1H), 7.59 (d, *J* = 7.9 Hz, 1H), 7.48 – 7.37 (m, 2H), 7.22 (d, *J* = 3.1 Hz, 1H), 3.92 (s, 2H), 2.75 (d, *J* = 3.1 Hz, 2H), 1.98 (t, *J* = 3.3 Hz, 3H), 1.75 – 1.65 (m, 9H), 1.61 (d, *J* = 12.2 Hz, 3H).

**<sup>13</sup>C NMR (125 MHz, CDCl<sub>3</sub>)** δ 150.0, 142.4, 139.6, 128.8, 126.0, 125.4, 125.3, 115.8, 48.0, 43.0, 36.9, 35.7, 28.8.

**HRMS (ESI) m/z:** [M+H]<sup>+</sup> Calcd. for C<sub>20</sub>H<sub>25</sub>N<sub>2</sub><sup>+</sup> 293.2012; Found: 293.2008.

### tert-butyl 4-(3-aminoquinolin-2-yl)piperidine-1-carboxylate (**3u**)

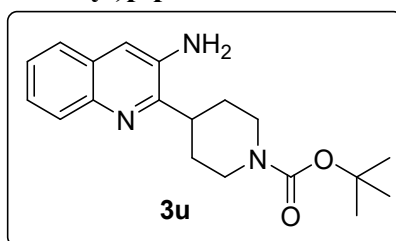

Following the **general procedure 1**, white solid, (m.p.: 104 – 106 °C), yield: 71%.

**<sup>1</sup>H NMR (500 MHz, CDCl<sub>3</sub>)** δ 7.93-7.90 (m 1H), 7.60-7.56 (m, 1H), 7.42-7.39 (m, 2H), 7.21 (s, 1H), 4.29 (s, 2H), 3.90 (s, 2H), 2.95 – 2.85 (m, 2H), 2.03 (s, 3H), 1.92 (s, 2H), 1.48 (s, 9H).

**<sup>13</sup>C NMR (125 MHz, CDCl<sub>3</sub>)** δ 154.82, 154.06, 142.64, 137.63, 128.83, 128.34, 126.16, 125.52, 125.31, 116.32, 79.44, 39.27, 29.94, 28.53, 22.7

**HRMS (ESI) m/z:** [M+H]<sup>+</sup> Calcd. for C<sub>19</sub>H<sub>26</sub>N<sub>3</sub>O<sub>2</sub><sup>+</sup> 328.2020; Found:328.2023.

### (E)-2-(octadec-9-en-1-yl)quinolin-3-amine (**3v**)

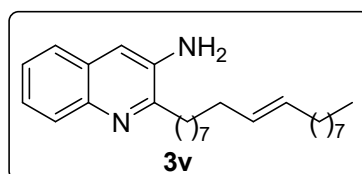

Following the **general procedure 1**, white solid, (m.p.: 122– 124 °C), yield: 34%.

**<sup>1</sup>H NMR (500 MHz, CDCl<sub>3</sub>)** δ 7.92 (m, 1H), 7.59 (d, *J* = 1.2 Hz, 1H), 7.45 – 7.43 (m, 2H), 7.21 (s, 1H), 5.36 – 5.32 (m, 2H), 3.90 (s, 3H), 3.86 (s, 2H), 2.91 – 2.86 (m, 2H), 2.00-2.32 (m, 4H), 1.86 – 1.77 (m, 2H), 1.71 (s, 2H), 1.50 – 1.44 (m, 2H), 1.34 – 1.31 (m, 5H), 1.25 (d, *J* = 4.1 Hz, 10H), 0.88 (d, *J* = 6.8 Hz, 3H).

**<sup>13</sup>C NMR (125 MHz, CDCl<sub>3</sub>)** δ 130.2, 129.99, 129.8, 129.5, 129.1, 127.3, 126.8, 126.0, 125.5, 125.3, 115.95, 115.69, 34.8, 31.9, 29.8, 29.79, 29.77, 29.5, 29.5, 29.3, 22.7, 21.0, 14.1.

**HRMS (ESI) m/z:** [M+H]<sup>+</sup> Calcd. for C<sub>27</sub>H<sub>43</sub>N<sub>2</sub><sup>+</sup> 395.3421; Found:395.3423

## 2-(1-(4-isobutylphenyl)ethyl)quinolin-3-amine

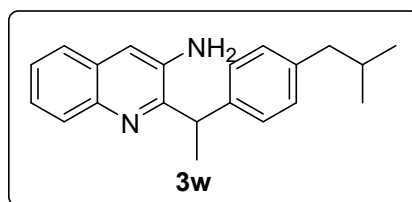

Following the **general procedure 1**, white solid, (m.p.: 112– 114 °C), yield: 42%.

**<sup>1</sup>H NMR (500 MHz, CDCl<sub>3</sub>)** δ 8.08 (m, 1H), 7.65 – 7.60 (m, 1H), 7.52 – 7.47 (m, 2H), 7.45 – 7.42 (m, 1H), 7.17 (d, *J* = 7.9 Hz, 2H), 7.08 (d, *J* = 8.0 Hz, 2H), 4.38 (m, 1H), 3.93 (s, 1H), 3.64 (s, 2H), 2.44 (d, *J* = 7.2 Hz, 2H), 1.83 (d, *J* = 7.0 Hz, 3H), 0.90 (d, *J* = 6.7 Hz, 6H).

**<sup>13</sup>C NMR (125 MHz, CDCl<sub>3</sub>)** δ 154.2, 142.4, 141.3, 140.19, 138.6, 130.2, 129.7, 129.2, 128.7, 127.3, 126.1, 125.4, 125.3, 116.6, 45.0, 43.7, 30.2, 22.4, 22.4, 20.9.

**HRMS (ESI) m/z:** [M+H]<sup>+</sup> Calcd. for C<sub>21</sub>H<sub>25</sub>N<sub>2</sub><sup>+</sup> 305.2012; Found:305.2011

## 2-cyclohexyl-6-methoxyquinolin-3-amine(4a)

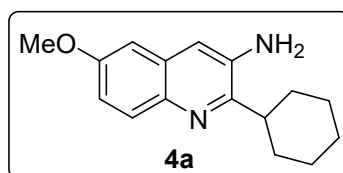

Following the **general procedure 1**, white solid, (m.p.: 115 – 116 °C), yield:45%.

**<sup>1</sup>H NMR (500 MHz, CDCl<sub>3</sub>)** δ 7.85 (d, *J* = 9.1 Hz, 1H), 7.14 – 7.06 (m, 2H), 6.86 (d, *J* = 2.7 Hz, 1H), 3.90 (s, 3H), 3.89 – 3.82 (m, 2H), 2.84 – 2.75 (m, 1H), 2.00 – 1.92 (m, 4H), 1.84 – 1.78 (m, 3H), 1.50 – 1.39 (m, 3H).

**<sup>13</sup>C NMR (125 MHz, CDCl<sub>3</sub>)** δ 157.5, 153.5, 138.7, 138.0, 130.3, 129.1, 117.5, 115.2, 103.4, 55.4, 41.1, 31.1, 26.8, 26.2.

**HRMS (ESI) m/z:** [M+H]<sup>+</sup> Calcd. for C<sub>16</sub>H<sub>21</sub>N<sub>2</sub>O<sup>+</sup> 257.1648; Found: 257.1647.

## 5-chloro-2-cyclohexylquinolin-3-amine(4b)

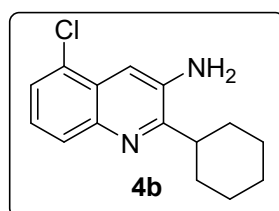

Following the **general procedure 1**, white solid, (m.p.: 118 – 120 °C), yield:61%.

**<sup>1</sup>H NMR (500 MHz, CDCl<sub>3</sub>)** δ 7.91 – 7.87 (m, 1H), 7.58 (d, *J* = 0.9 Hz, 1H), 7.49 – 7.45 (m, 1H), 7.36 – 7.31 (m, 1H), 4.05 (s, 2H), 2.88 – 2.79 (m, 1H), 2.02 – 1.94 (m, 4H), 1.86 – 1.79 (m, 3H), 1.53 – 1.39 (m, 3H).

**<sup>13</sup>C NMR (125 MHz, CDCl<sub>3</sub>)** δ 156.7, 143.1, 138.6, 128.5, 128.0, 126.4, 125.8, 124.7, 112.2, 41.2, 31.0, 26.7, 26.1.

**HRMS (ESI) m/z:** [M+H]<sup>+</sup> Calcd. for C<sub>15</sub>H<sub>18</sub>ClN<sub>2</sub><sup>+</sup> 261.1153; Found:261.1156.

## 6-chloro-2-cyclohexylquinolin-3-amine(4c)

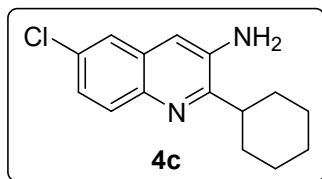

Following the **general procedure 1**, white solid, (m.p.: 113 – 116 °C), yield:81%.

**<sup>1</sup>H NMR (500 MHz, CDCl<sub>3</sub>)** δ 7.87 (d, *J* = 8.9 Hz, 1H), 7.53 (d, *J* = 2.3 Hz, 1H), 7.38 – 7.33 (m, 1H), 7.10 (s, 1H), 3.96 (s, 2H), 2.85 – 2.77 (m, 1H), 2.00 – 1.93 (m, 4H), 1.85 – 1.77 (m, 3H), 1.51 – 1.38 (m, 3H).

**<sup>13</sup>C NMR (125 MHz, CDCl<sub>3</sub>)** δ 156.3, 141.0, 138.4, 131.5, 130.4, 129.0, 126.0, 123.8, 114.4, 41.3, 31.0, 26.7, 26.1.

**HRMS (ESI) m/z:** [M+H]<sup>+</sup> Calcd. for C<sub>15</sub>H<sub>18</sub>ClN<sub>2</sub><sup>+</sup> 261.1153; Found: 261.1156.

### 7-chloro-2-cyclohexylquinolin-3-amine(4d)

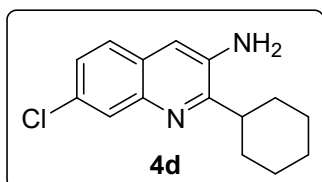

Following the **general procedure 1**, white solid, (m.p.: 103 – 105 °C), yield:78%.

**<sup>1</sup>H NMR (500 MHz, CDCl<sub>3</sub>)** δ 7.97 (d, *J* = 2.0 Hz, 1H), 7.49 (d, *J* = 8.6 Hz, 1H), 7.35 – 7.30 (m, 1H), 7.17 (s, 1H), 3.92 (s, 2H), 2.82 (tt, *J* = 11.6, 3.3 Hz, 1H), 1.99 – 1.94 (m, 4H), 1.85 – 1.78 (m, 3H), 1.49 – 1.39 (m, 3H).

**<sup>13</sup>C NMR (125 MHz, CDCl<sub>3</sub>)** δ 157.1, 142.9, 137.8, 130.7, 127.9, 126.7, 126.6, 126.4, 115.4, 41.3, 31.0, 26.7, 26.1.

**HRMS (ESI) m/z:** [M+Na]<sup>+</sup> Calcd. for C<sub>15</sub>H<sub>17</sub>ClN<sub>2</sub>Na<sup>+</sup> 283.0972; Found: 283.0966.

### 2-cyclohexyl-4-methylquinolin-3-amine(4e)

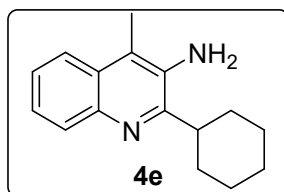

Following the **general procedure 1**, white solid, (m.p.: 119 – 120 °C), yield:61%.

**<sup>1</sup>H NMR (500 MHz, CDCl<sub>3</sub>)** δ 8.01 – 7.96 (m, 1H), 7.86 – 7.82 (m, 1H), 7.47 – 7.42 (m, 2H), 3.89 (s, 2H), 2.91 – 2.81 (m, 1H), 2.48 – 2.43 (m, 3H), 2.03 – 1.94 (m, 4H), 1.90 – 1.81 (m, 3H), 1.53 – 1.40 (m, 3H).

**<sup>13</sup>C NMR (125 MHz, CDCl<sub>3</sub>)** δ 155.1, 142.3, 135.2, 129.7, 127.5, 125.6, 124.8, 122.1, 120.8, 41.7, 31.1, 26.9, 26.2, 11.5.

**HRMS (ESI) m/z:** [M+H]<sup>+</sup> Calcd. for C<sub>16</sub>H<sub>21</sub>N<sub>2</sub><sup>+</sup> 241.1699; Found:241.1703.

### 6-chloro-2-(1-methylcyclopropyl)quinolin-3-amine(4f)

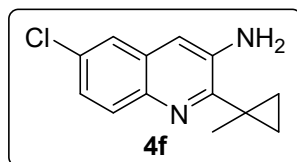

Following the **general procedure 1**, white solid, (m.p.: 112 – 114 °C), yield:57%.

$^1\text{H NMR}$  (500 MHz,  $\text{CDCl}_3$ )  $\delta$  7.89 (d,  $J = 8.9$  Hz, 1H), 7.54 (d,  $J = 2.4$  Hz, 1H), 7.37 – 7.33 (m, 1H), 7.12 (s, 1H), 4.32 (s, 2H), 1.50 (s, 3H), 1.14 – 1.08 (m, 2H), 0.96 – 0.89 (m, 2H).

$^{13}\text{C NMR}$  (125 MHz,  $\text{CDCl}_3$ )  $\delta$  154.1, 140.3, 139.7, 131.9, 130.3, 129.6, 126.0, 123.7, 114.1, 22.0, 20.6, 12.9.

**HRMS (ESI) m/z:**  $[\text{M}+\text{H}]^+$  Calcd. for  $\text{C}_{13}\text{H}_{14}\text{ClN}_2^+$  233.0840; Found:233.0842.

#### 4-methyl-2-(tetrahydro-2H-pyran-4-yl)quinolin-3-amine (4g)

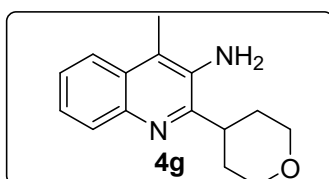

Following the **general procedure 1**, white solid (m.p.: 94 – 96 °C), yield: 40%.

$^1\text{H NMR}$  (500 MHz,  $\text{CDCl}_3$ )  $\delta$  8.01 – 7.96 (m, 1H), 7.87 – 7.82 (m, 1H), 7.50 – 7.42 (m, 2H), 4.23 – 4.13 (m, 2H), 3.90 (s, 2H), 3.69 – 3.59 (m, 2H), 3.15 – 3.08 (m, 1H), 2.44 (s, 3H), 2.28 – 2.20 (m, 2H), 1.93 – 1.85 (m, 2H).

$^{13}\text{C NMR}$  (125 MHz,  $\text{CDCl}_3$ )  $\delta$  152.9, 142.3, 135.2, 129.7, 127.6, 125.9, 125.1, 122.2, 121.2, 68.2, 38.8, 30.7, 11.5.

**HRMS (ESI) m/z:**  $[\text{M}+\text{H}]^+$  Calcd. for  $\text{C}_{15}\text{H}_{19}\text{N}_2\text{O}^+$  243.1492, Found:243.1487.

#### tert-butyl 4-(3-amino-6-chloroquinolin-2-yl)-4-methylpiperidine-1-carboxylate(4h)

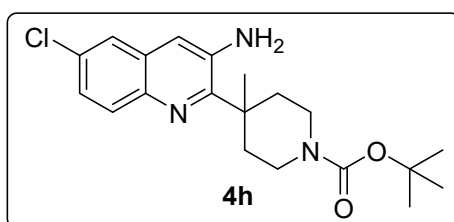

Following the **general procedure 1**, white solid, (m.p.: 127 – 130 °C), yield:55%.

$^1\text{H NMR}$  (500 MHz,  $\text{CDCl}_3$ )  $\delta$  7.93 – 7.90 (m, 1H), 7.60 – 7.56 (m, 1H), 7.42 – 7.39 (m, 1H), 7.24 (s, 1H), 3.94 (s, 2H), 3.76 (s, 2H), 3.28 (d,  $J = 50.4$  Hz, 2H), 2.72 (d,  $J = 13.1$  Hz, 2H), 1.78 – 1.72 (m, 2H), 1.48 (s, 3H), 1.47 (s, 9H).

$^{13}\text{C NMR}$  (125 MHz,  $\text{CDCl}_3$ )  $\delta$  155.1, 154.1, 141.8, 138.6, 129.1, 128.2, 126.4, 125.5, 124.9, 118.7, 79.1, 40.3, 31.6, 28.5, 28.5, 25.5, 22.7, 14.1.

**HRMS (ESI) m/z:**  $[\text{M}+\text{Na}]^+$  Calcd. for  $\text{C}_{20}\text{H}_{26}\text{ClN}_3\text{NaO}_2^+$  398.1606; Found:398.1602.

#### 3-azido-2-cyclohexylquinoline(5a)



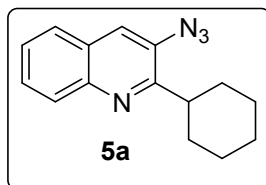

Following the **general procedure 2**, white solid, (m.p.: 127 – 130 °C), yield:82% .

**<sup>1</sup>H NMR (500 MHz, CDCl<sub>3</sub>)** δ 8.61 (s, 1H), 8.04 (d, *J* = 8.5 Hz, 1H), 7.73 – 7.63 (m, 2H), 7.49 (t, *J* = 7.5 Hz, 1H), 3.34 – 3.24 (m, 1H), 2.06 – 1.98 (m, 2H), 1.98 – 1.91 (m, 2H), 1.82 – 1.71 (m, 3H), 1.57 – 1.37 (m, 3H).

**<sup>13</sup>C NMR (125 MHz, CDCl<sub>3</sub>)** δ 160.0, 145.4, 132.6, 129.1, 128.4, 127.2, 126.5, 126.1, 122.2, 41.1, 31.4, 26.6, 26.1.

**HRMS (ESI) m/z:** [M+H]<sup>+</sup> Calcd. for C<sub>15</sub>H<sub>17</sub>N<sub>4</sub><sup>+</sup> 253.1448; Found:253.1450.

### 2-cyclohexyl-3-iodoquinoline(5b)

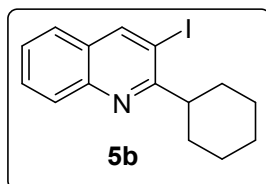

Following the **general procedure 3**, white solid, (m.p.: 127 – 130 °C), yield: 66%.

**<sup>1</sup>H NMR (500 MHz, CDCl<sub>3</sub>)** δ 8.05 (d, *J* = 8.4 Hz, 1H), 7.80 – 7.68 (m, 2H), 7.67 – 7.58 (m, 1H), 7.54 – 7.47 (m, 1H), 3.20 – 3.10 (m, 1H), 1.96 – 1.88 (m, 4H), 1.83 – 1.72 (m, 3H), 1.50 – 1.39 (m, 3H).

**<sup>13</sup>C NMR (125 MHz, CDCl<sub>3</sub>)** δ 164.9, 147.1, 146.2, 129.6, 129.2, 128.3, 126.3, 126.2, 94.4, 48.1, 32.0, 26.5, 26.1.

**HRMS (ESI) m/z:** [M+H]<sup>+</sup> Calcd. for C<sub>15</sub>H<sub>17</sub>IN<sup>+</sup> 338.0400; Found:238.0403.

## 5. References

1. (a) Cornella, J.; Edwards, J. T.; Qin, T.; Kawamura, S.; Wang, J.; Pan, C.-M.; Gianatassio, R.; Schmidt, M. A.; Eastgate, M. D.; Baran, P. S. *J. Am. Chem. Soc.* **2016**, *138*, 2174. (b) Jin, Y.-H.; Jiang, M.; Wang, H.; Fu, H. *Sci. Rep.* **2016**, *6*, 20068. (c) Schwarz, J.; König, B. *Green. Chem.* **2016**, *18*, 4743. (d) Pratsch, G.; Lackner, G. L.; Overman, L. E. *J. Org. Chem.* **2015**, *80*, 6025.
2. S. Ghorai, Y. J.; Lin, Y. Z.; Xia, D. J. Wink, D. Lee, *Org. Lett.* **2020**, *22*, 642.
3. I. Choi, H. Chung,; J. W. Park,; Y. K. Chung. *Org. Lett.* **2016**, *18*, 5508.
4. H. G. Cheng, R. M. Zhang, S. W. Yang, M. Wang. X. f. Zeng, L. J. Xie, C. S. Xie, J. Wu, G. F. Zhong, *Adv. Synth. Catal.* **2016**, *358*, 970.

## 6. NMR spectroscopic data

### 2-cyclohexylquinolin-3-amine(3a)

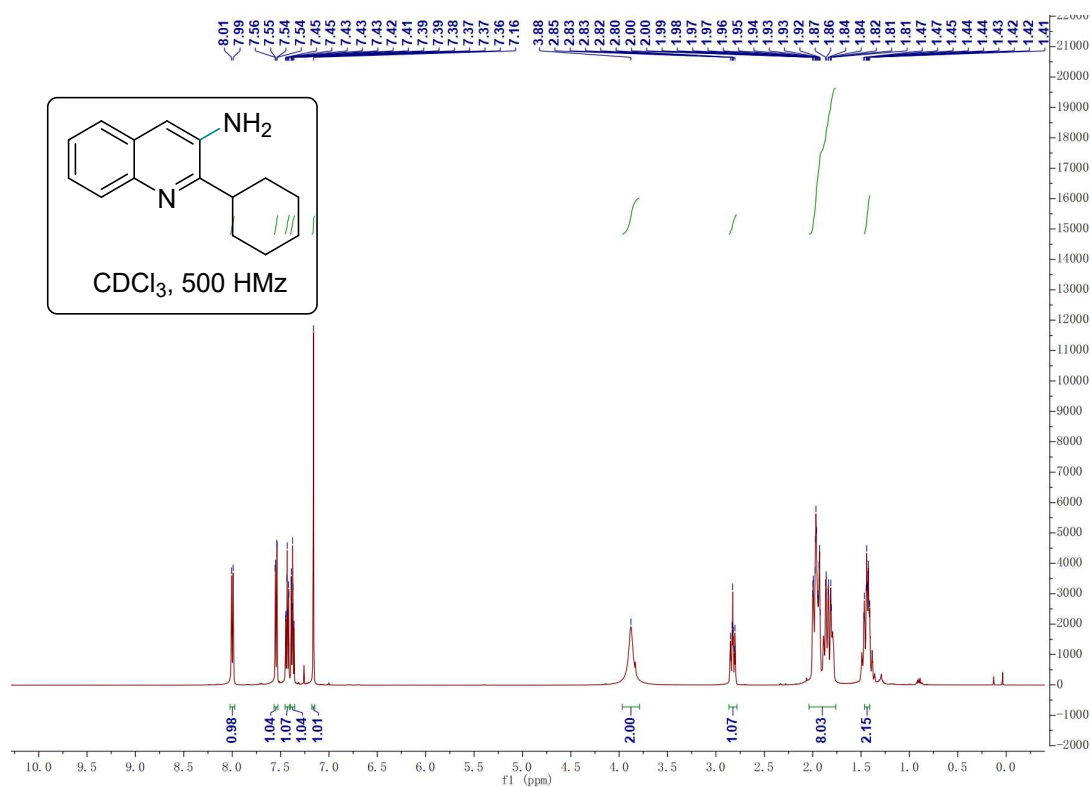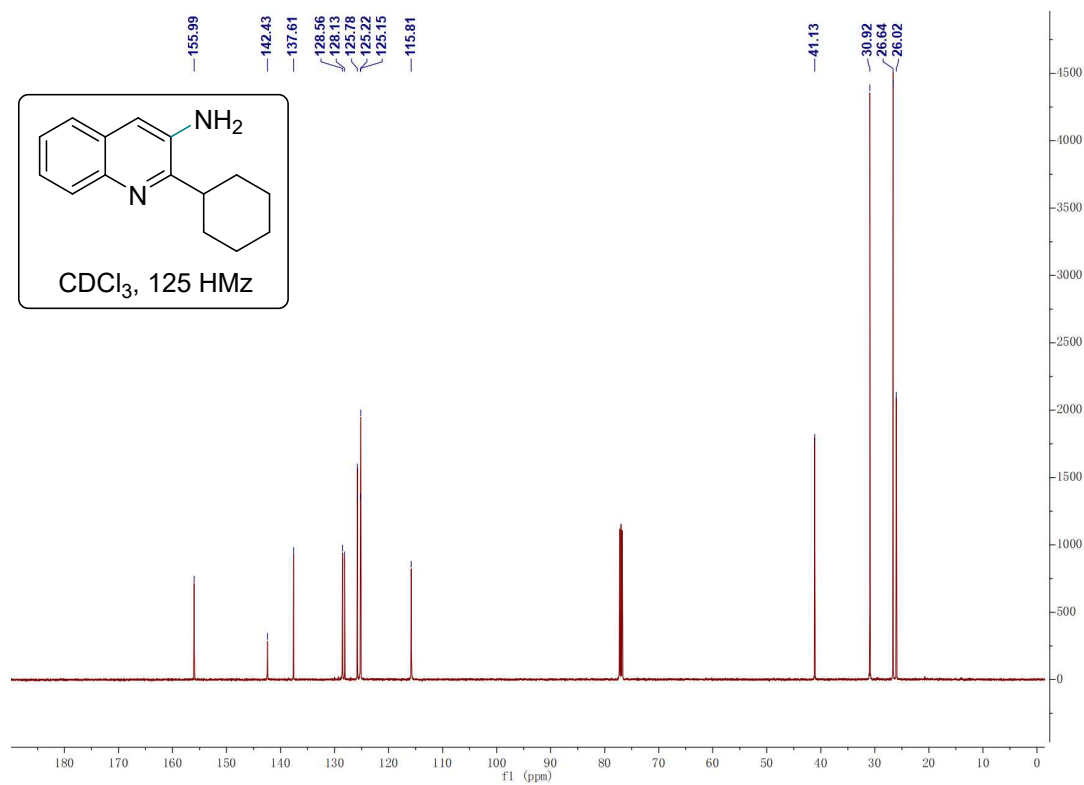

2-(1-methylcyclohexyl)quinolin-3-amine (3b)

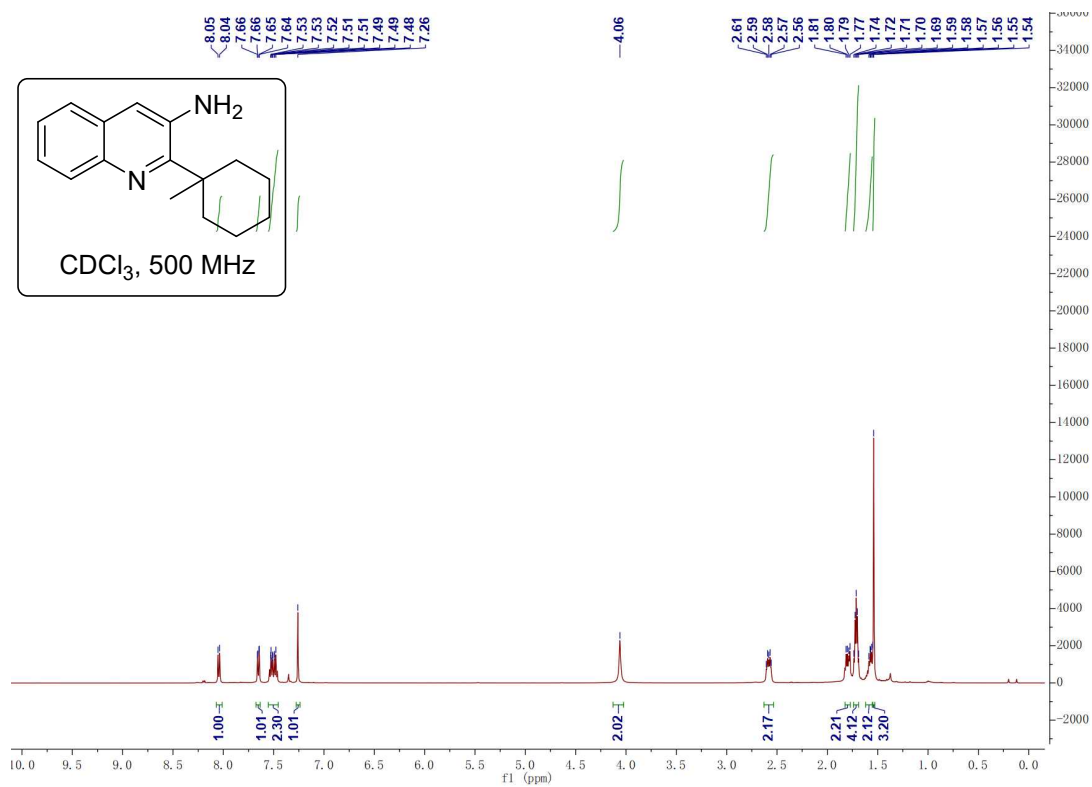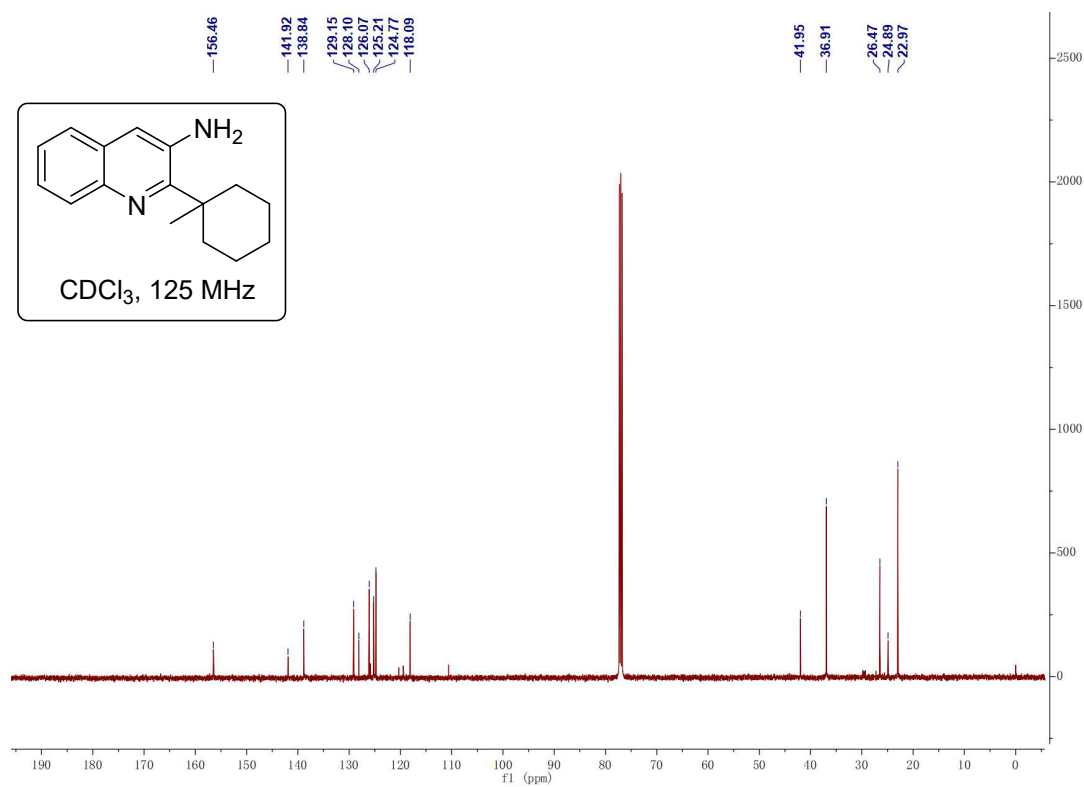

### 2-cyclopentylquinolin-3-amine (3c)

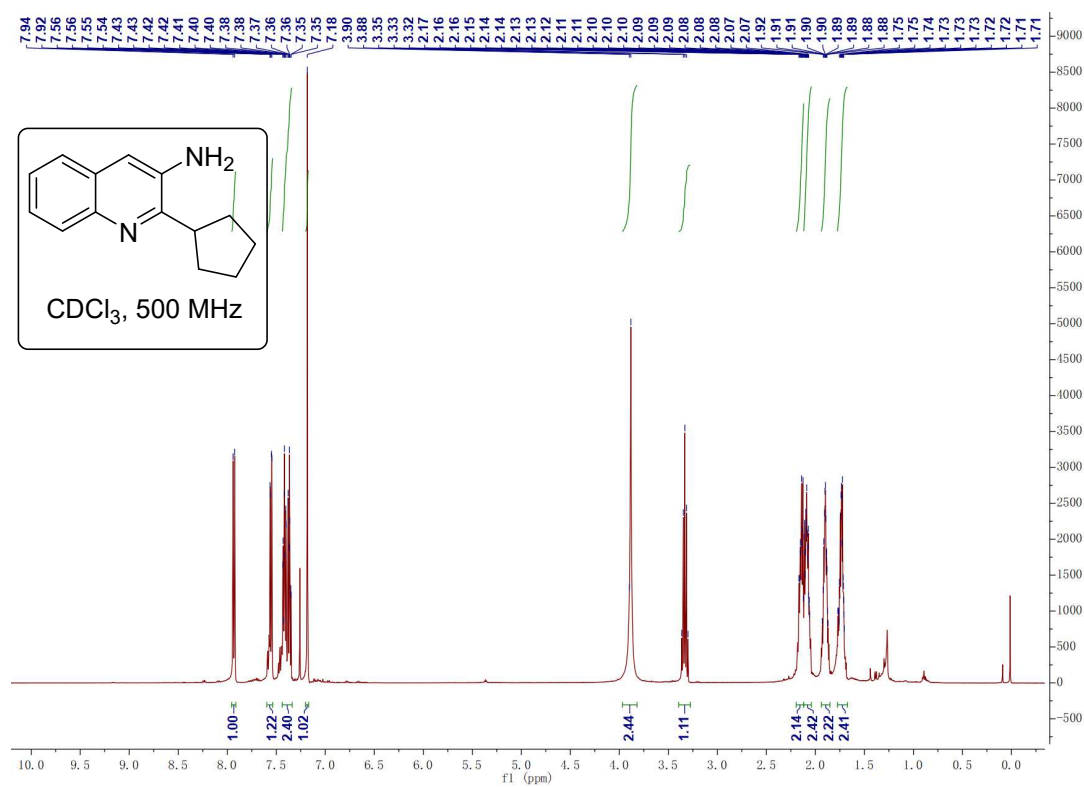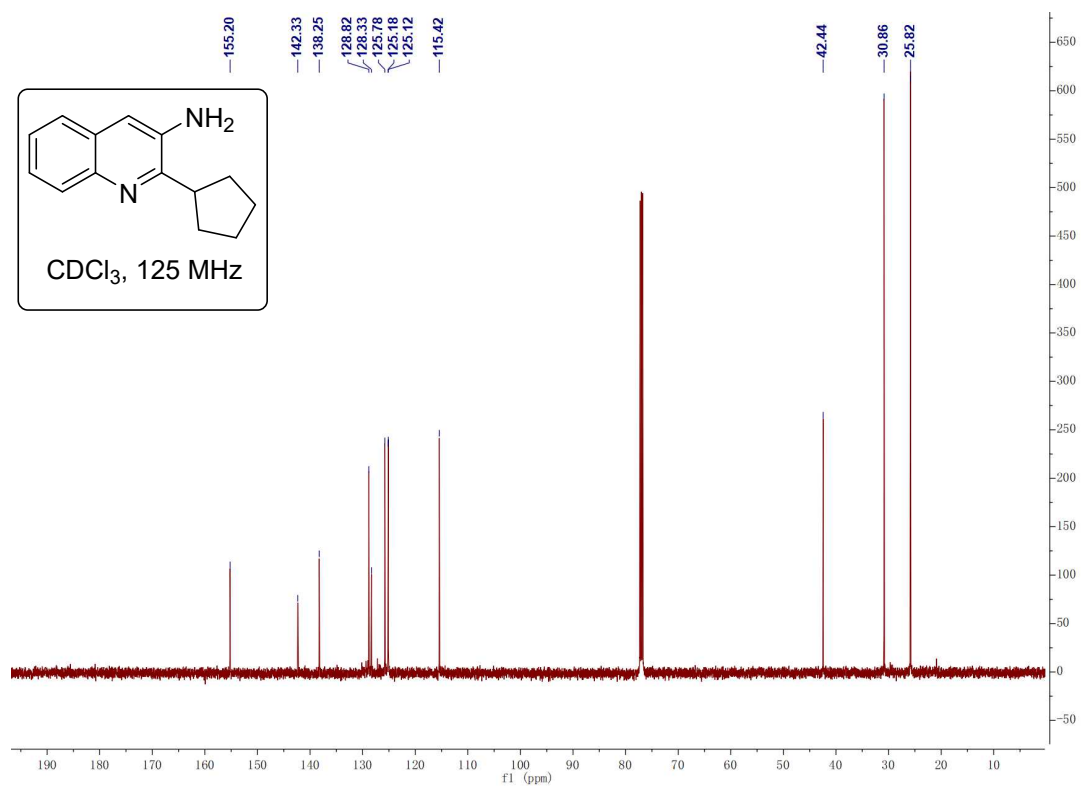

### 2-cyclobutylquinolin-3-amine(3d)

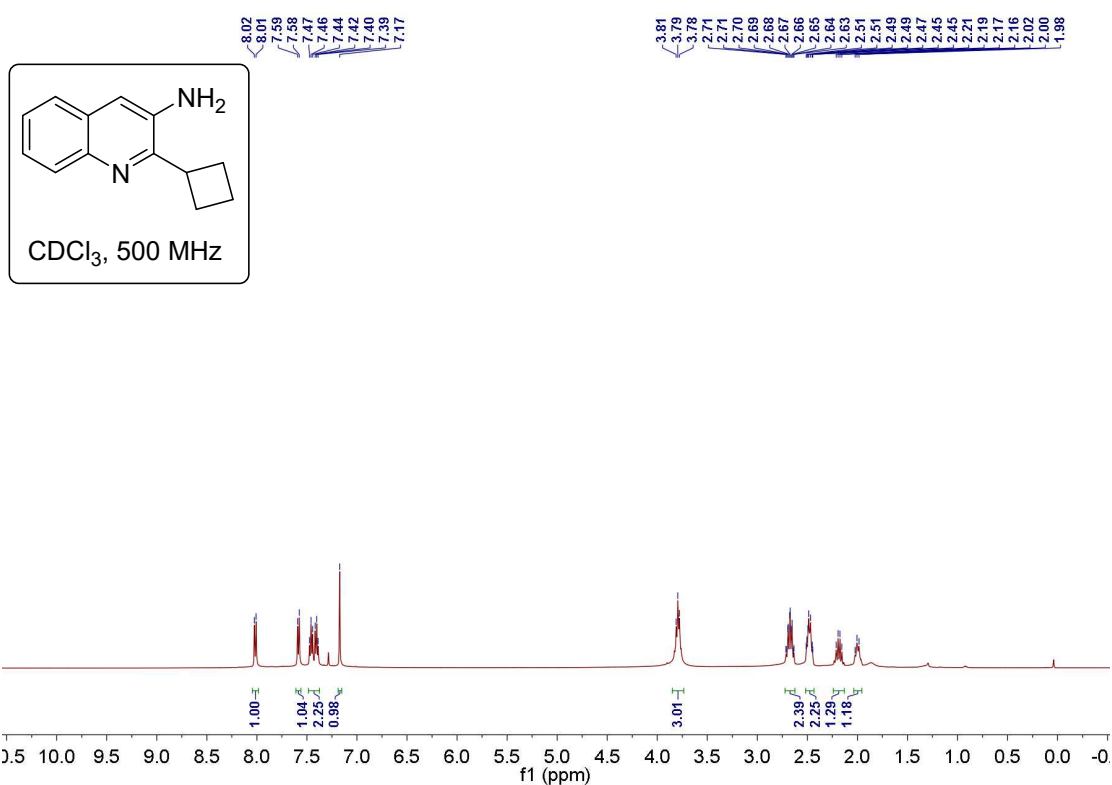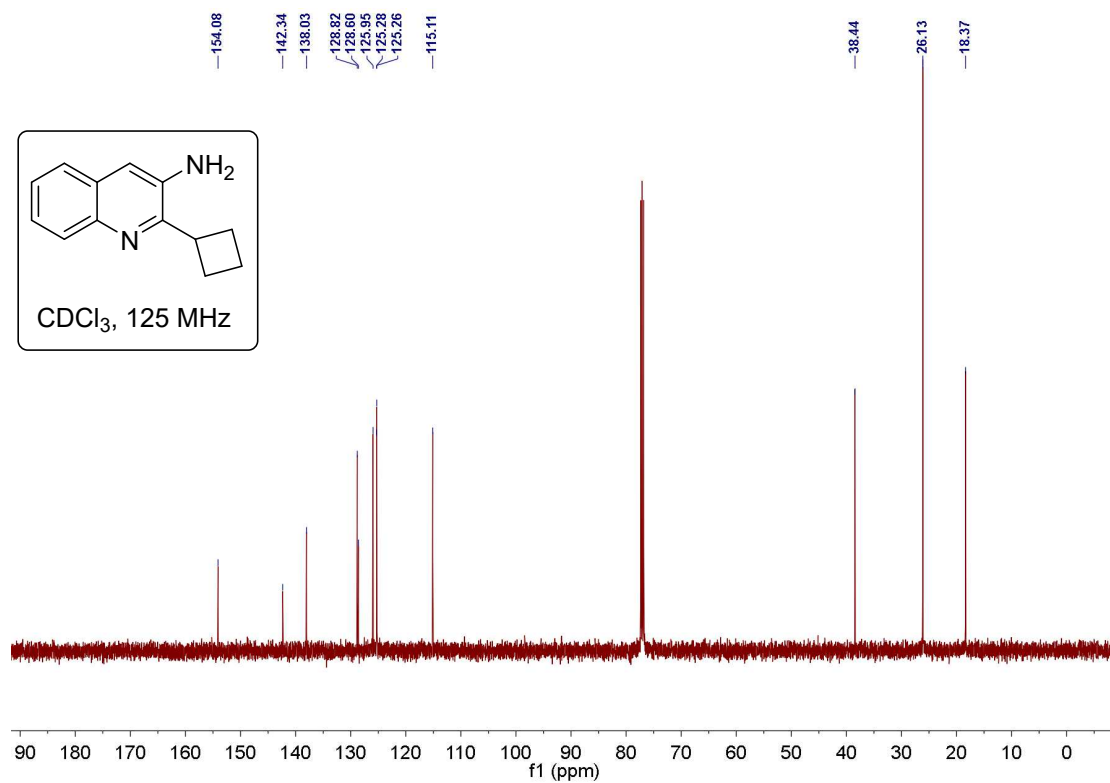

### 2-(1-methylcyclopropyl)quinolin-3-amine(3e)

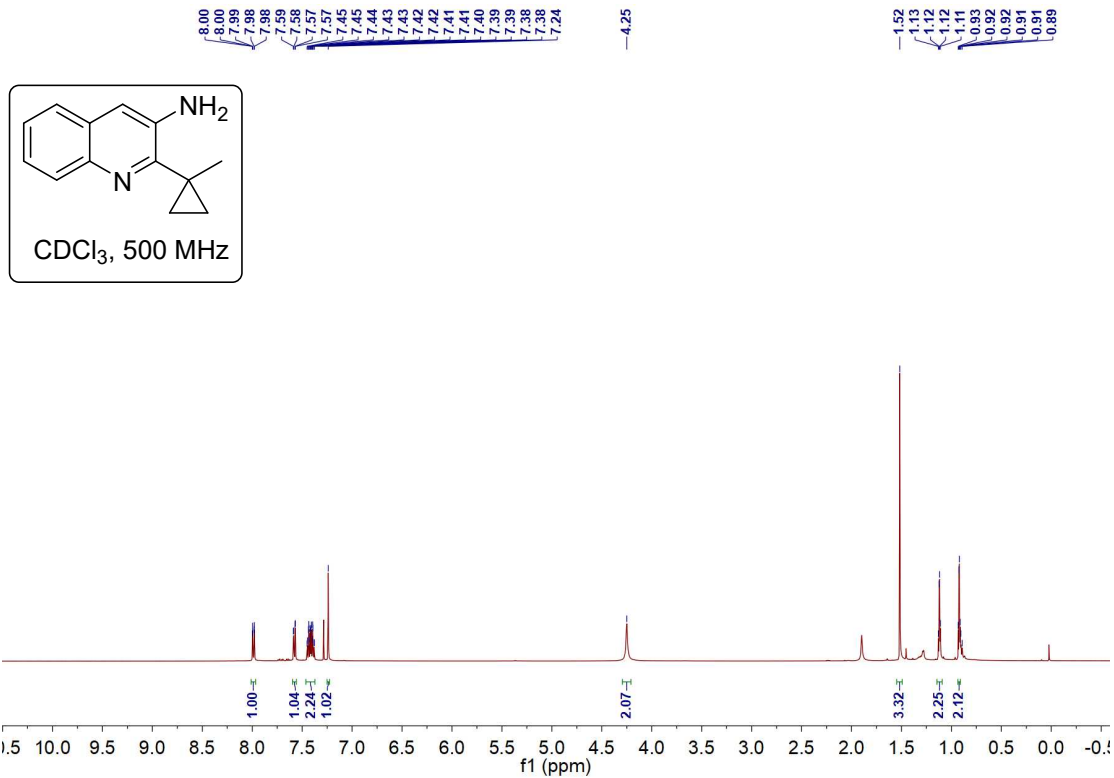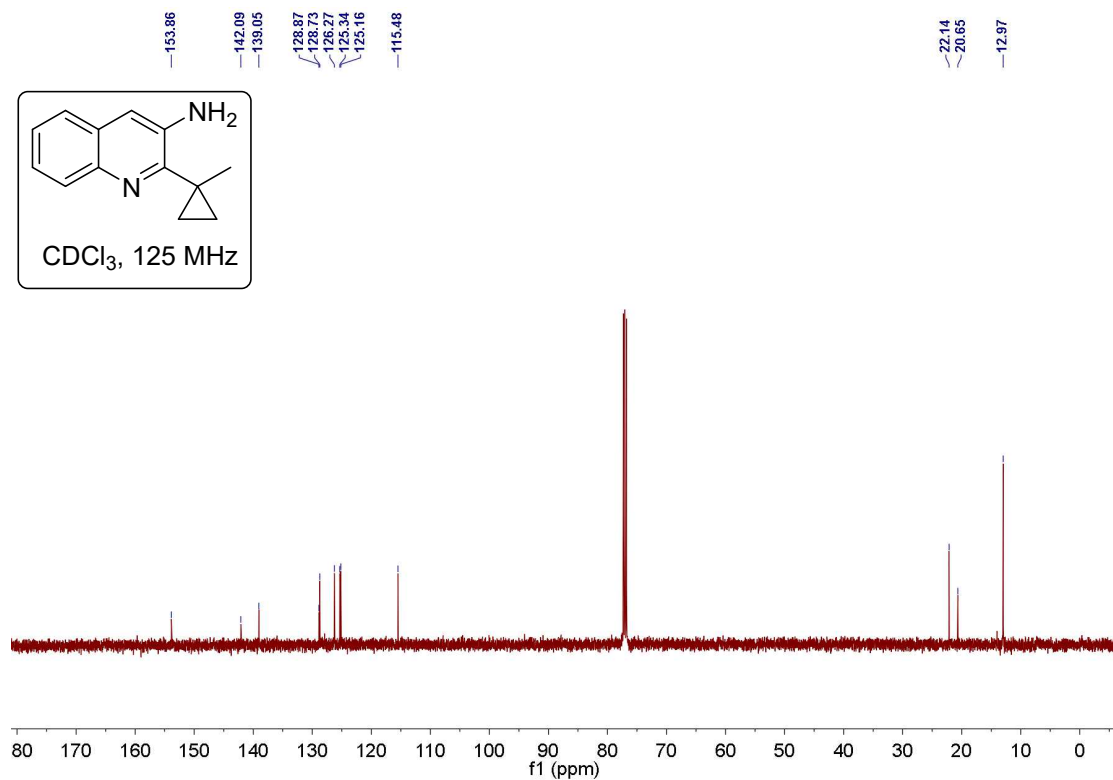

2-(2,2,3,3-tetramethylcyclopropyl)quinolin-3-amine(3f)

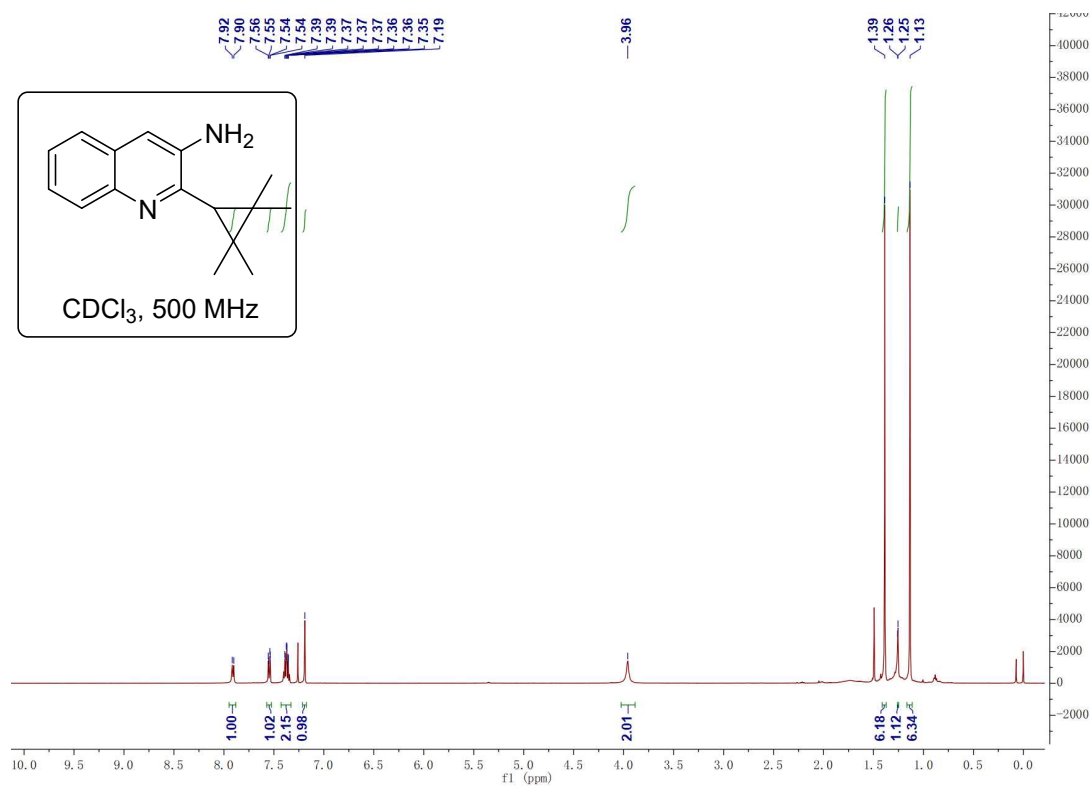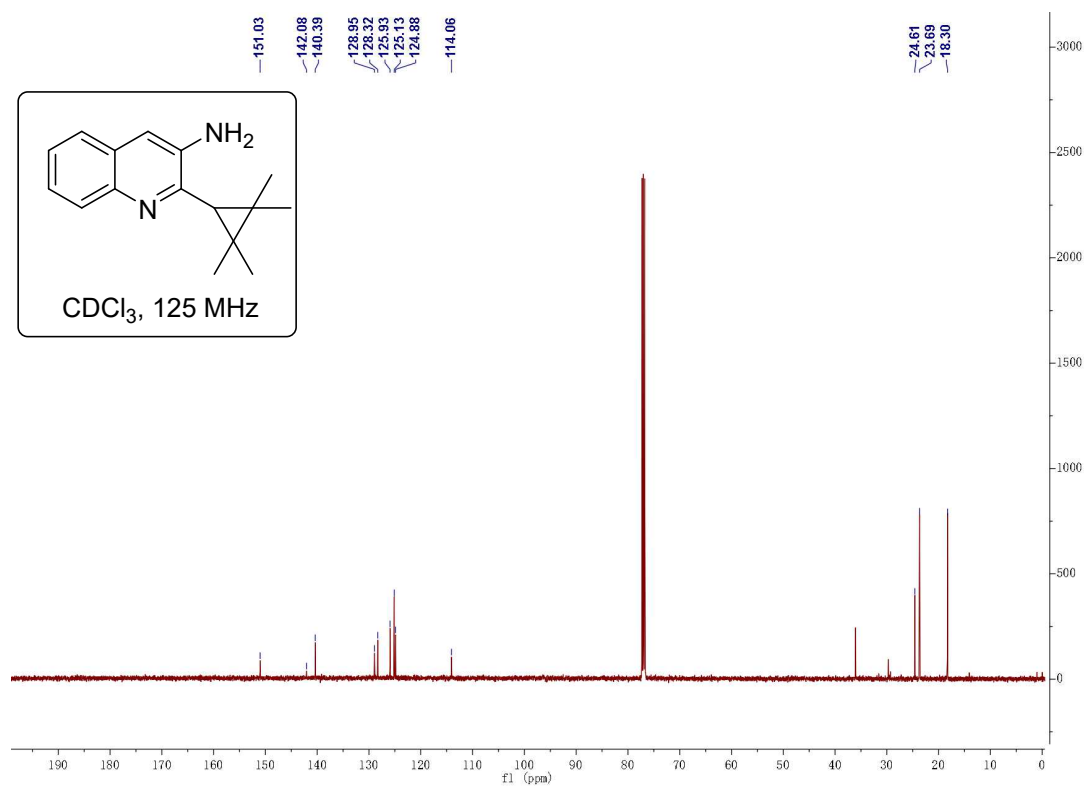



### 2-(1-phenylcyclopropyl)quinolin-3-amine(3g)

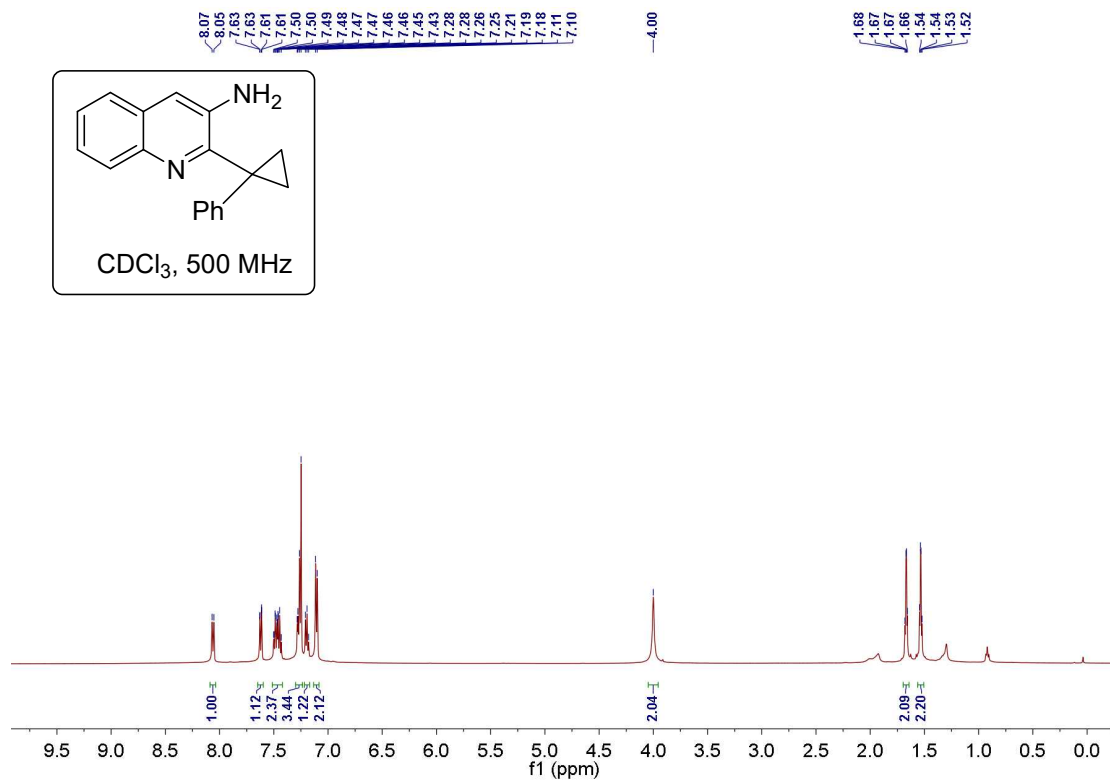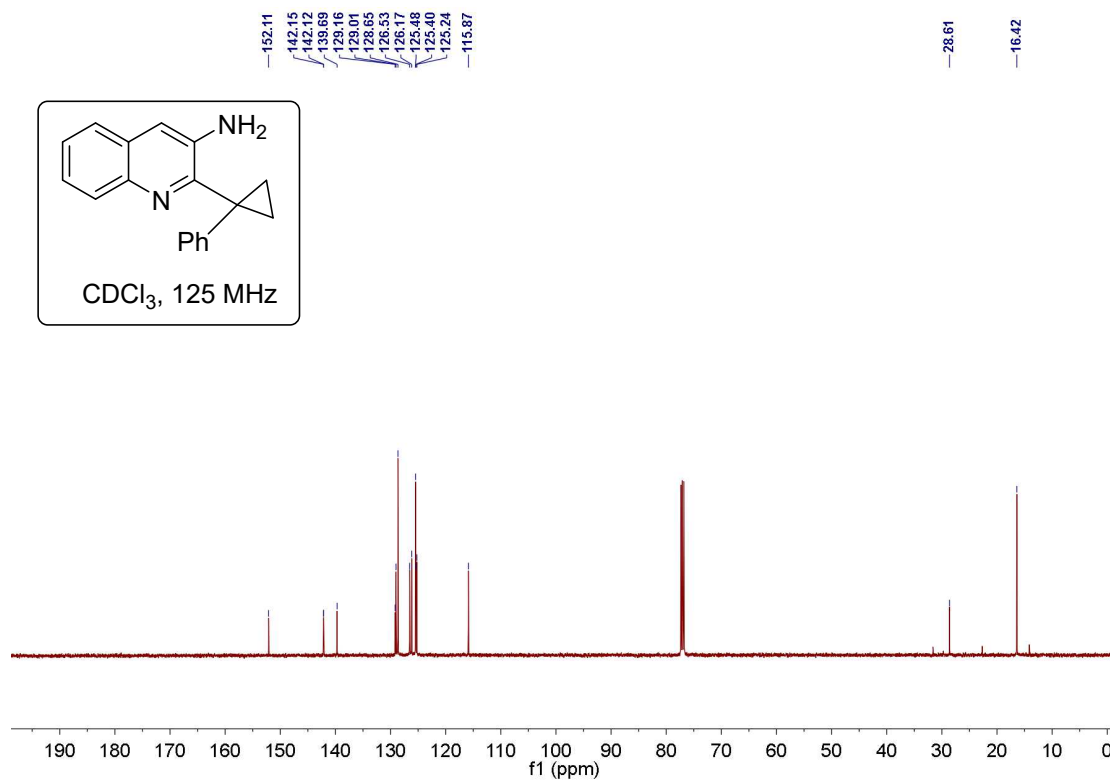

### 2-(tetrahydro-2H-pyran-4-yl)quinolin-3-amine(3h)

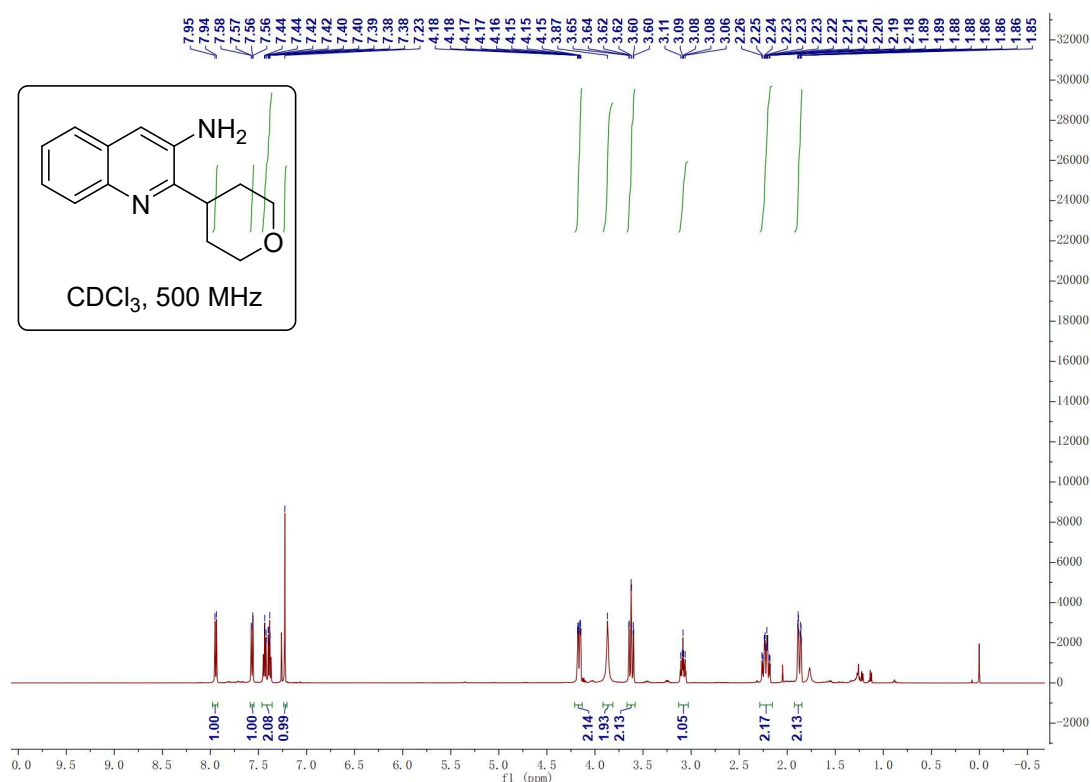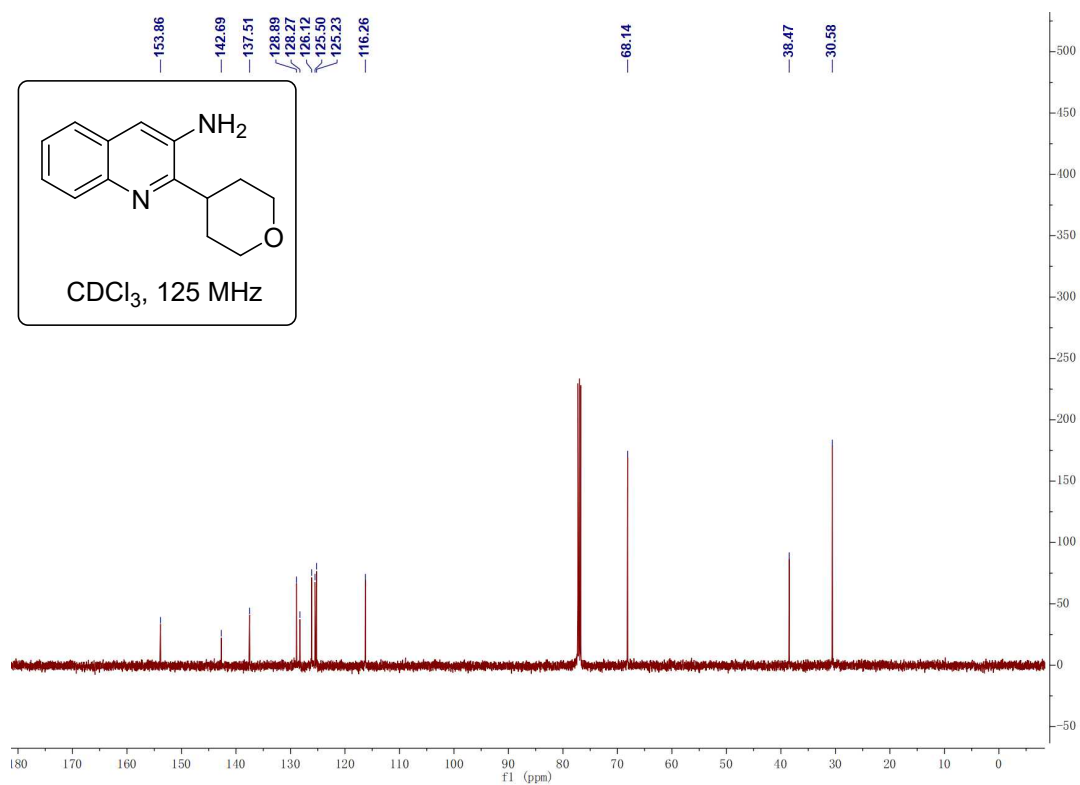

## 2-methylquinolin-3-amine(3i)

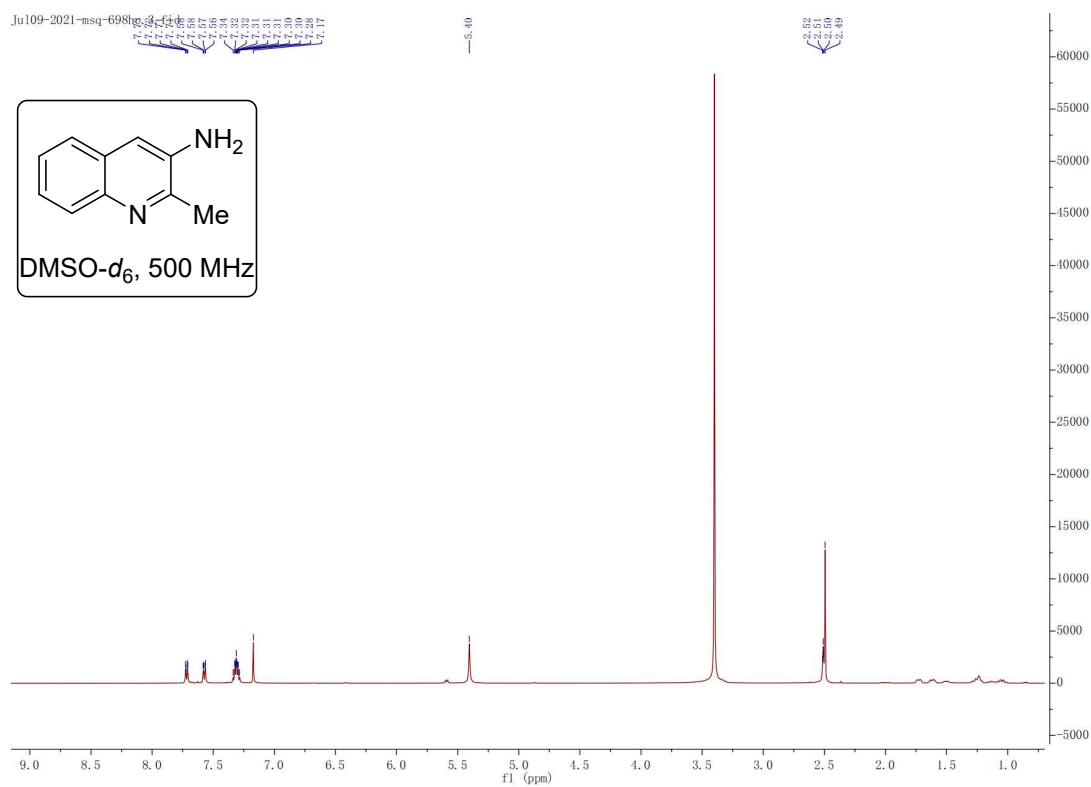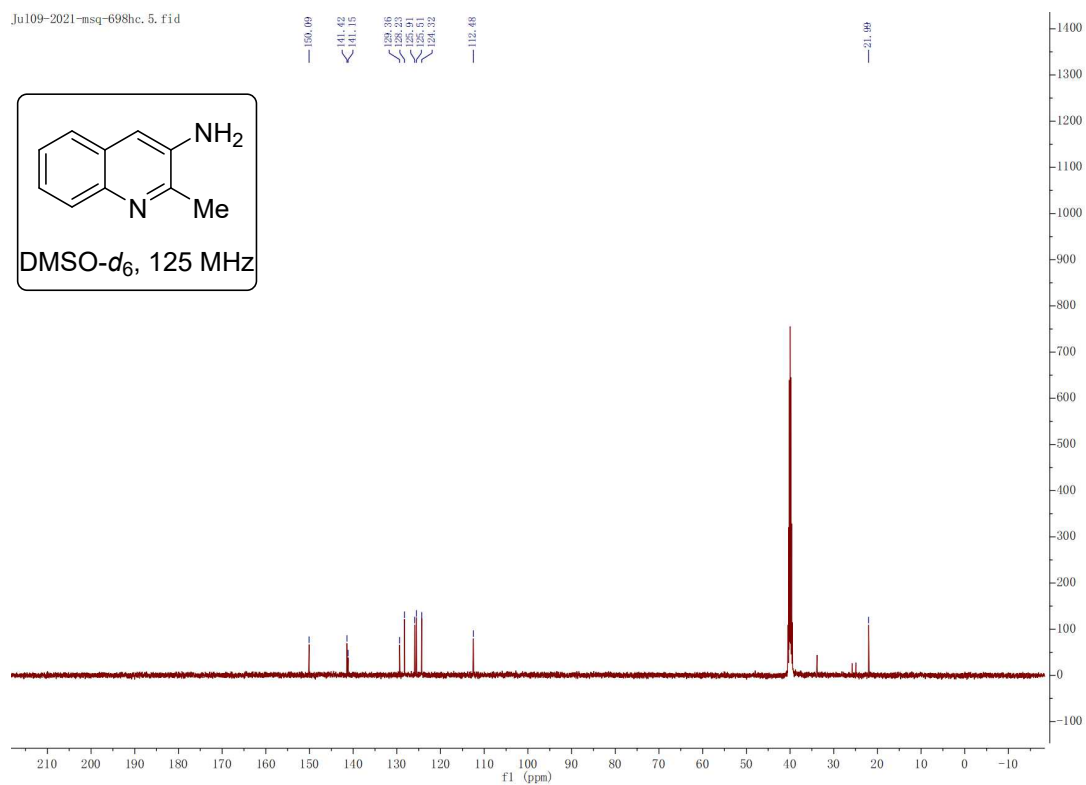

### 2-isopropylquinolin-3-amine (3j)

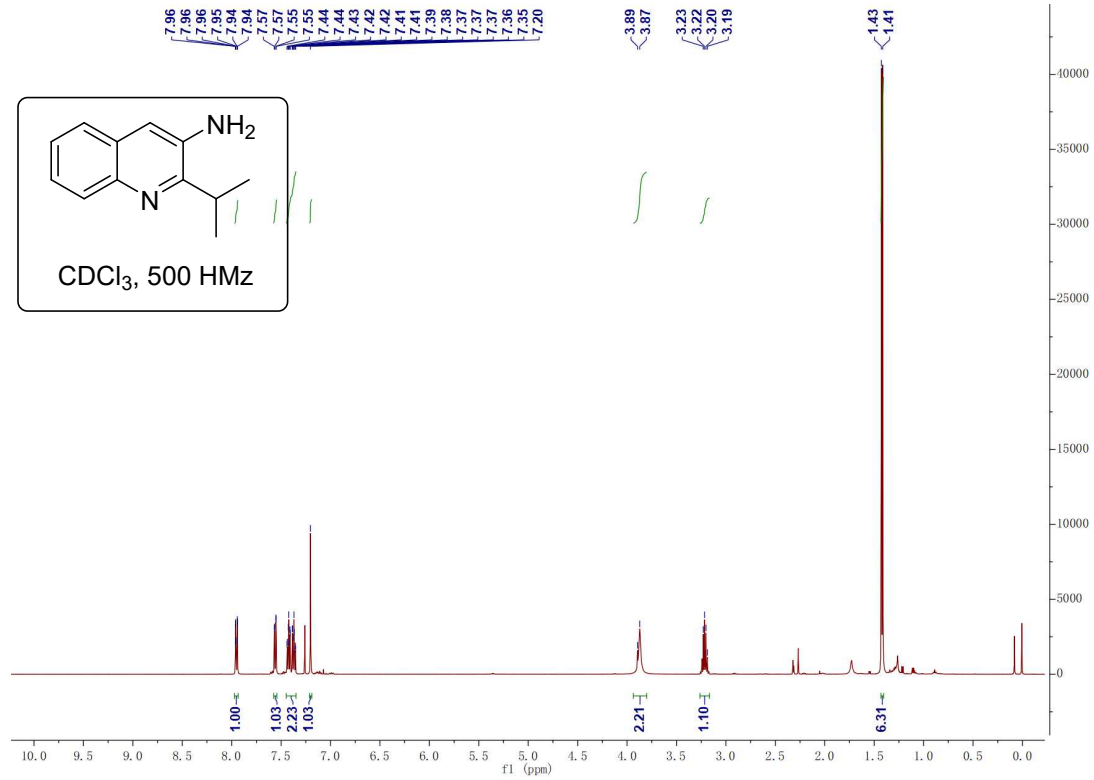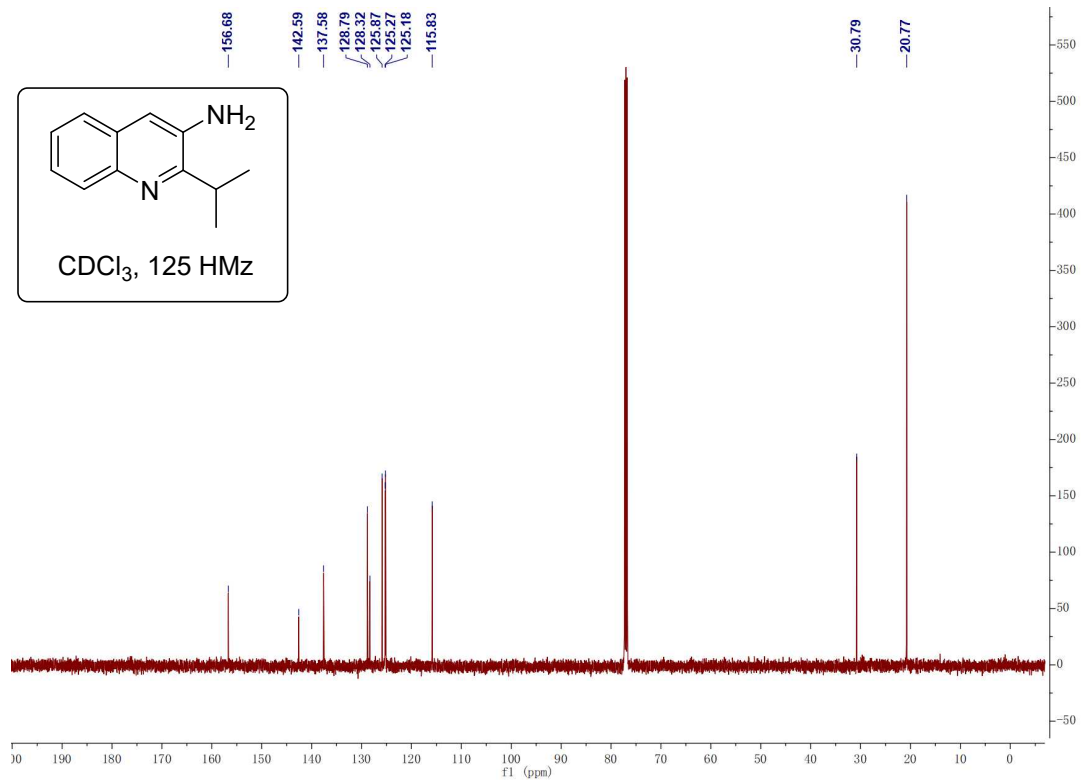

2-(tert-butyl)quinolin-3-amine(3k)

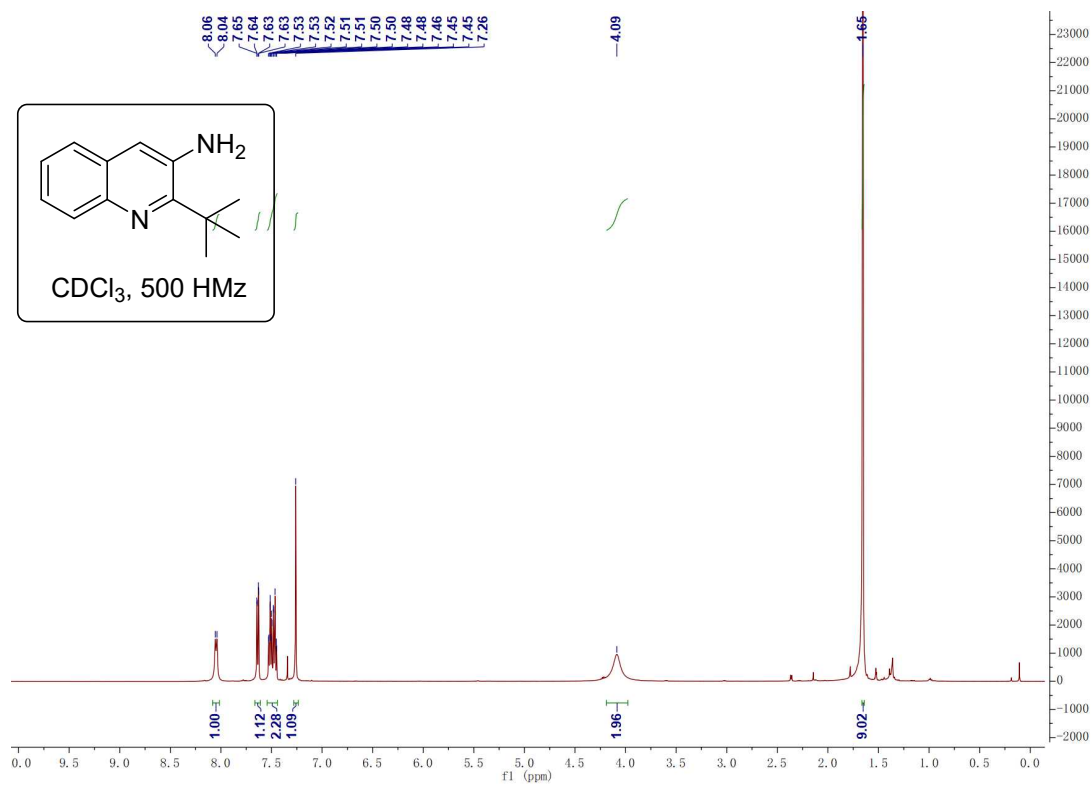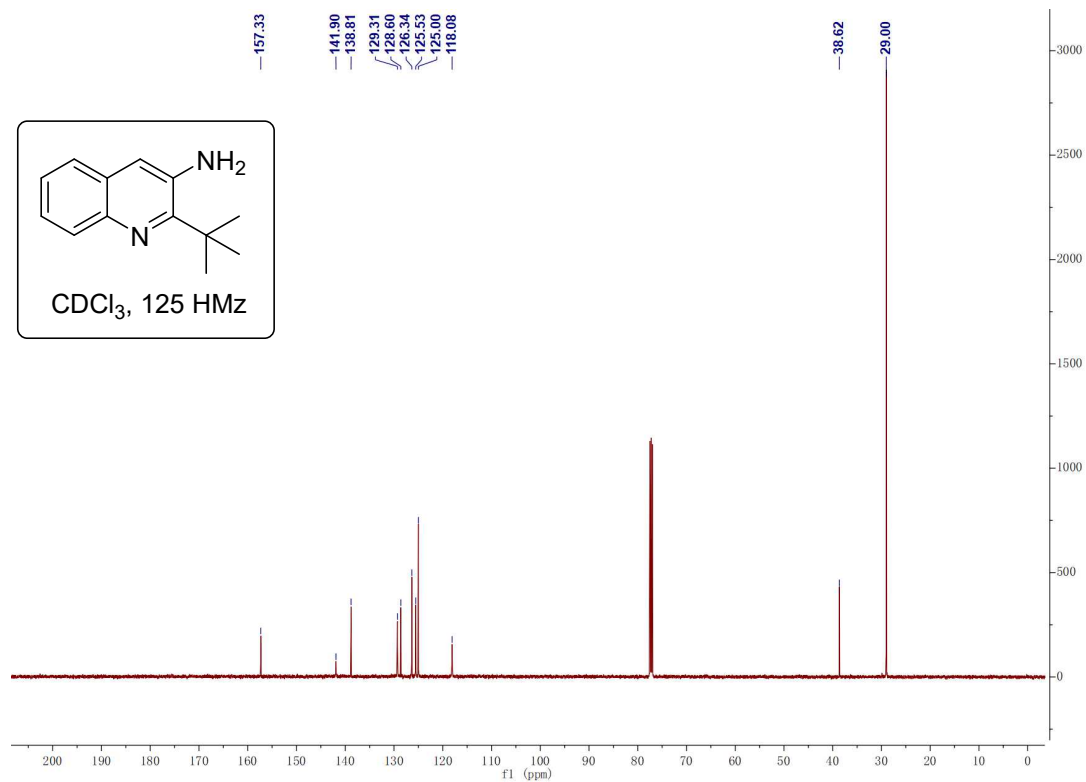

2-(tert-pentyl)quinolin-3-amine(3I)

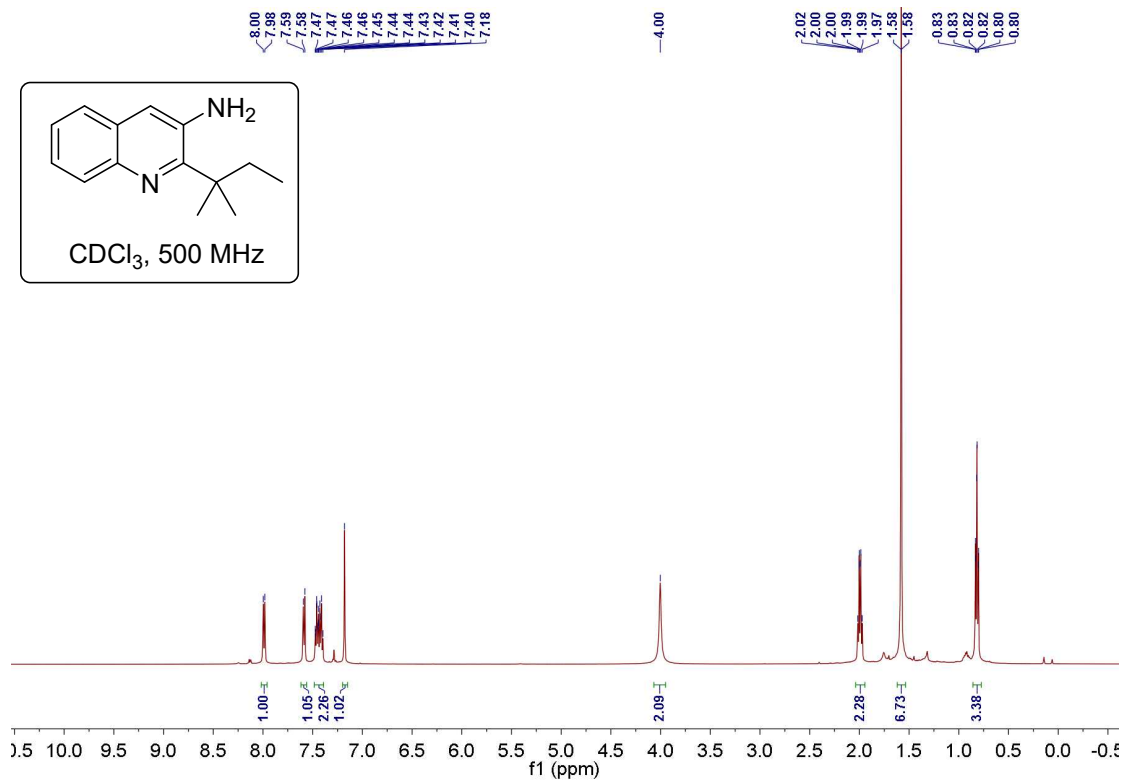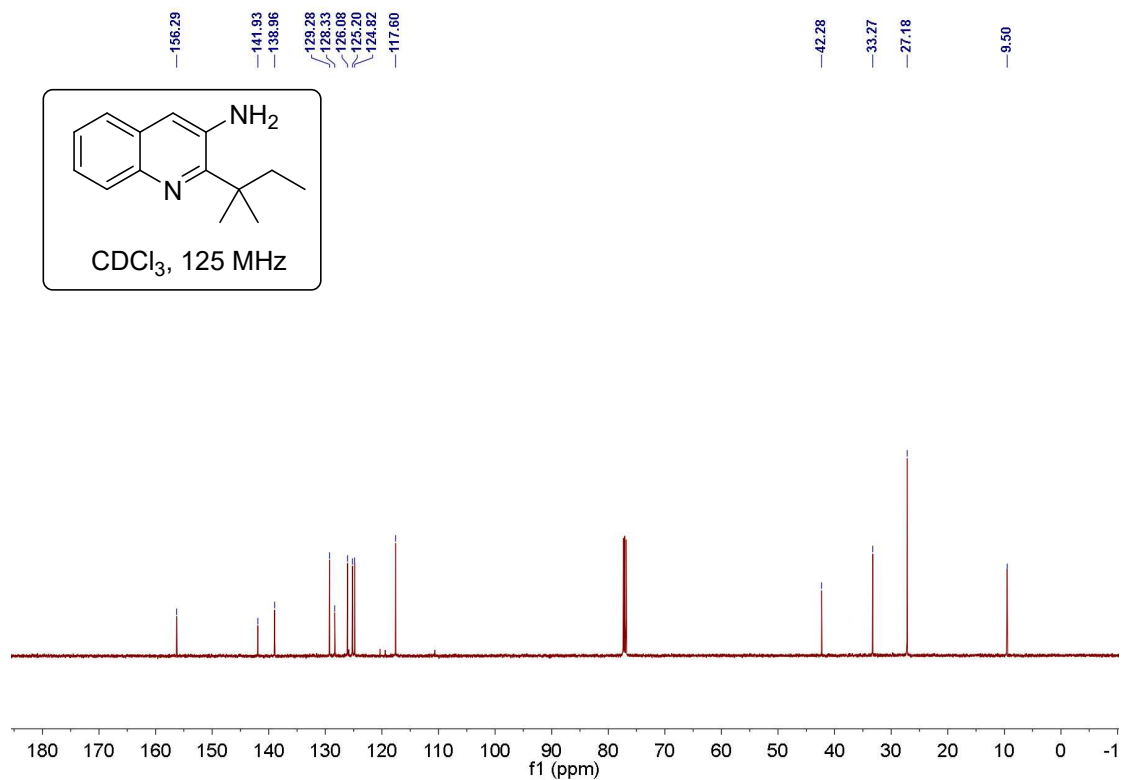

2-(4-methylpentyl)quinolin-3-amine(3m)

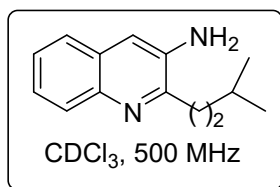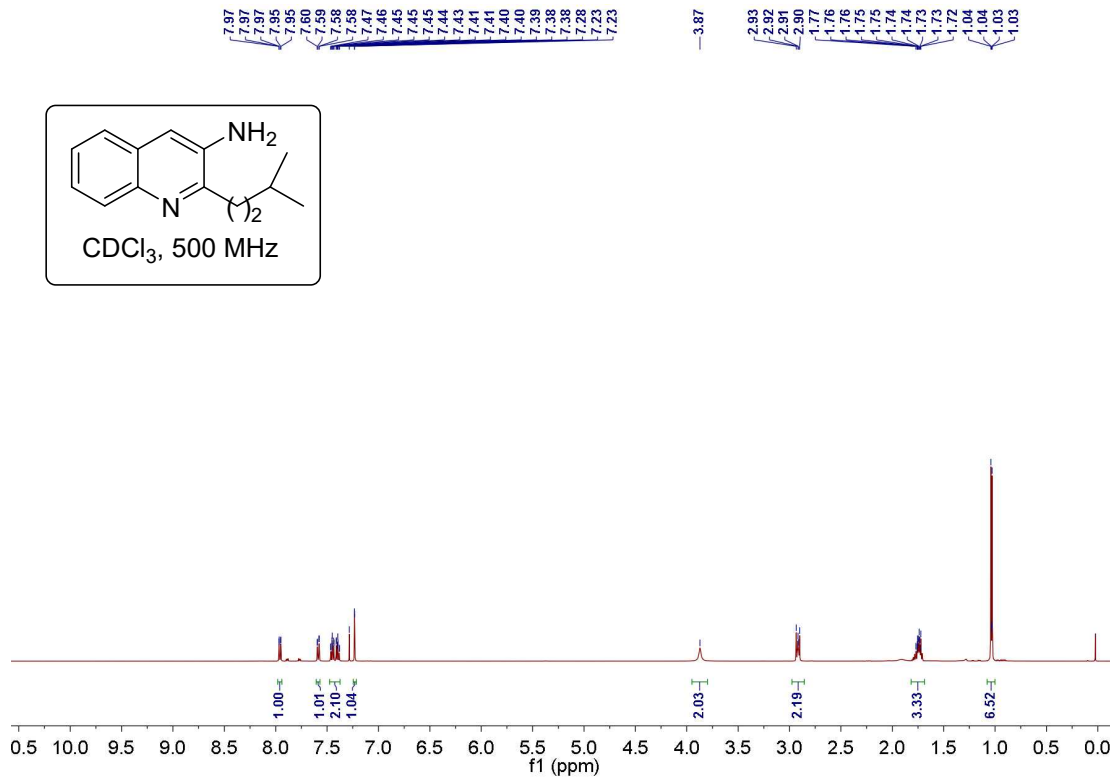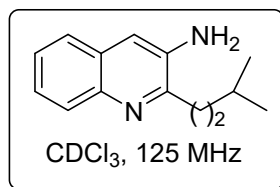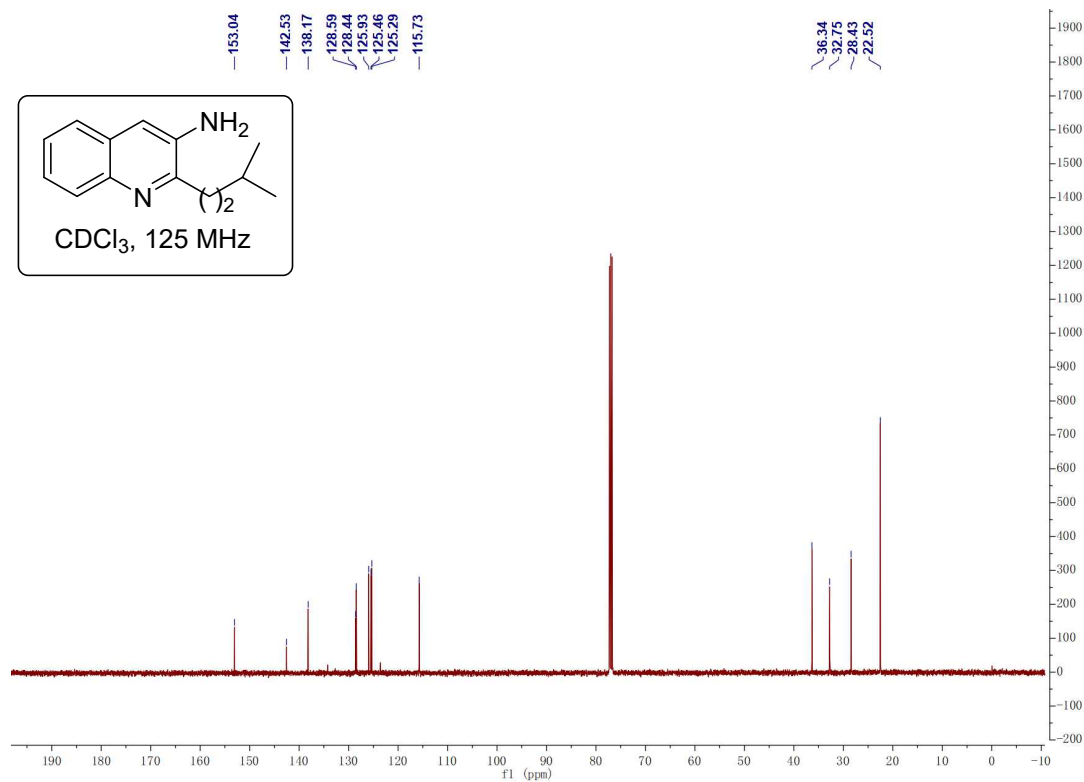

### 2-(tert-pentyl)quinolin-3-amine (3n)

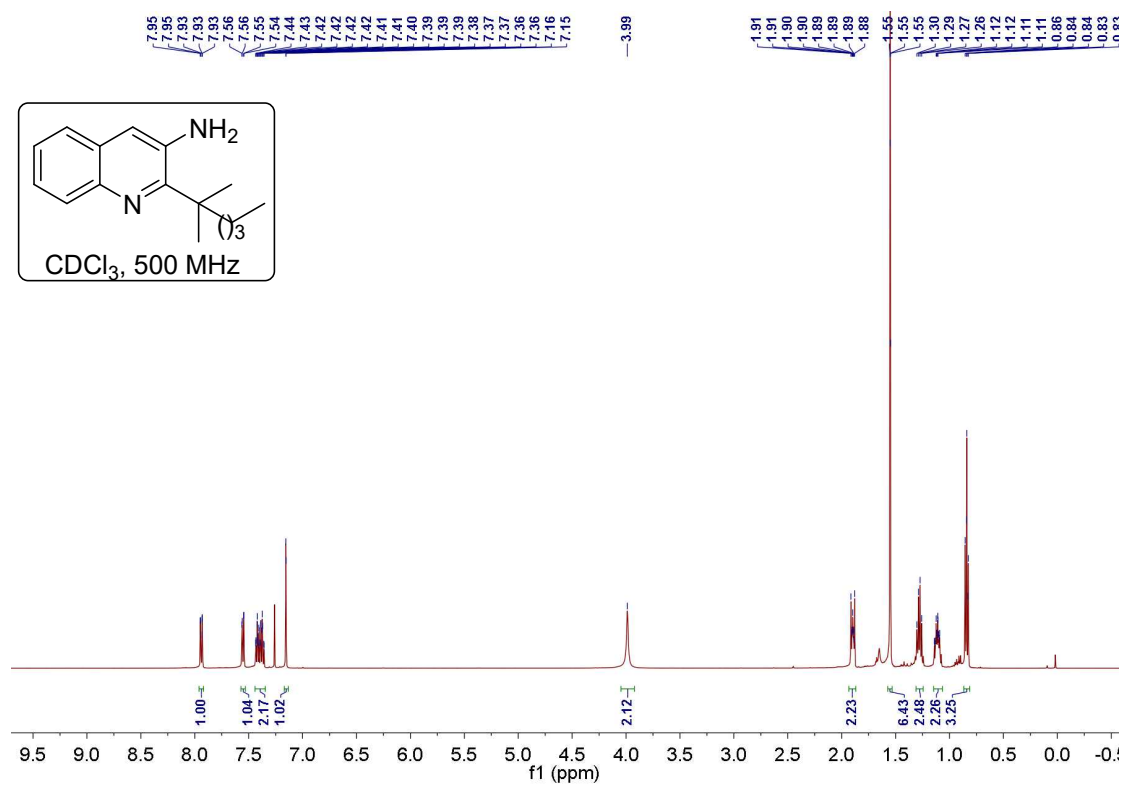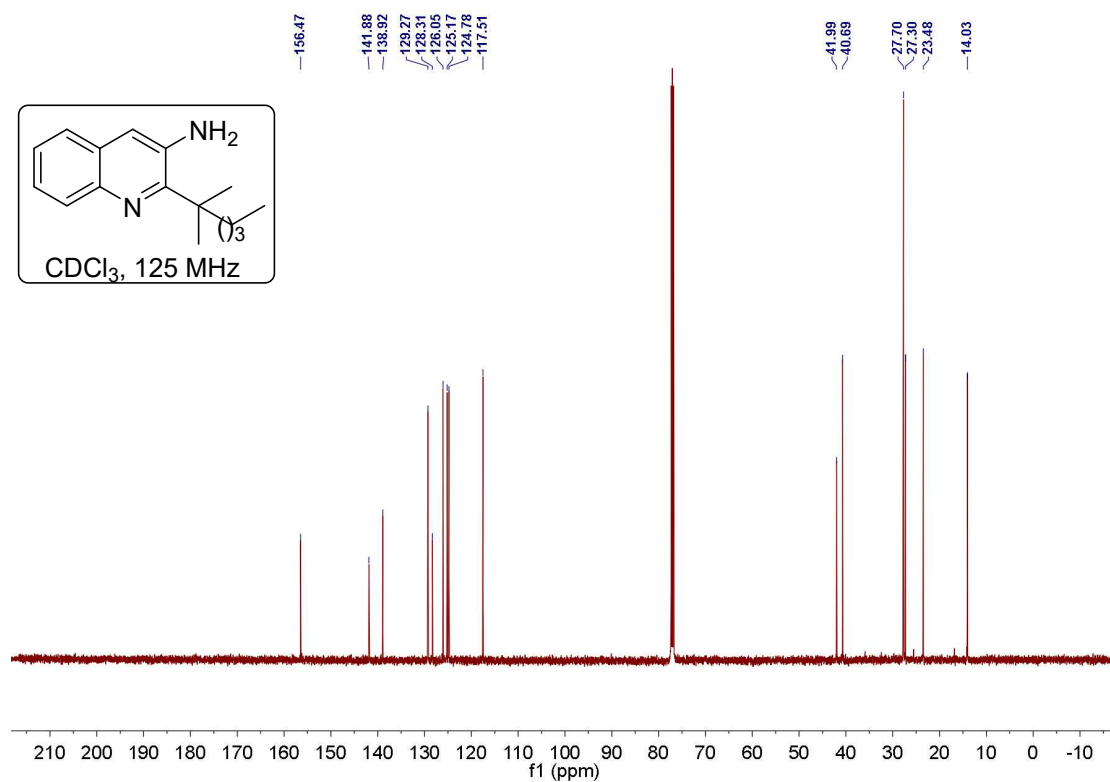



### 2-(2-methyl-1-phenylpropan-2-yl)quinolin-3-amine(3o)

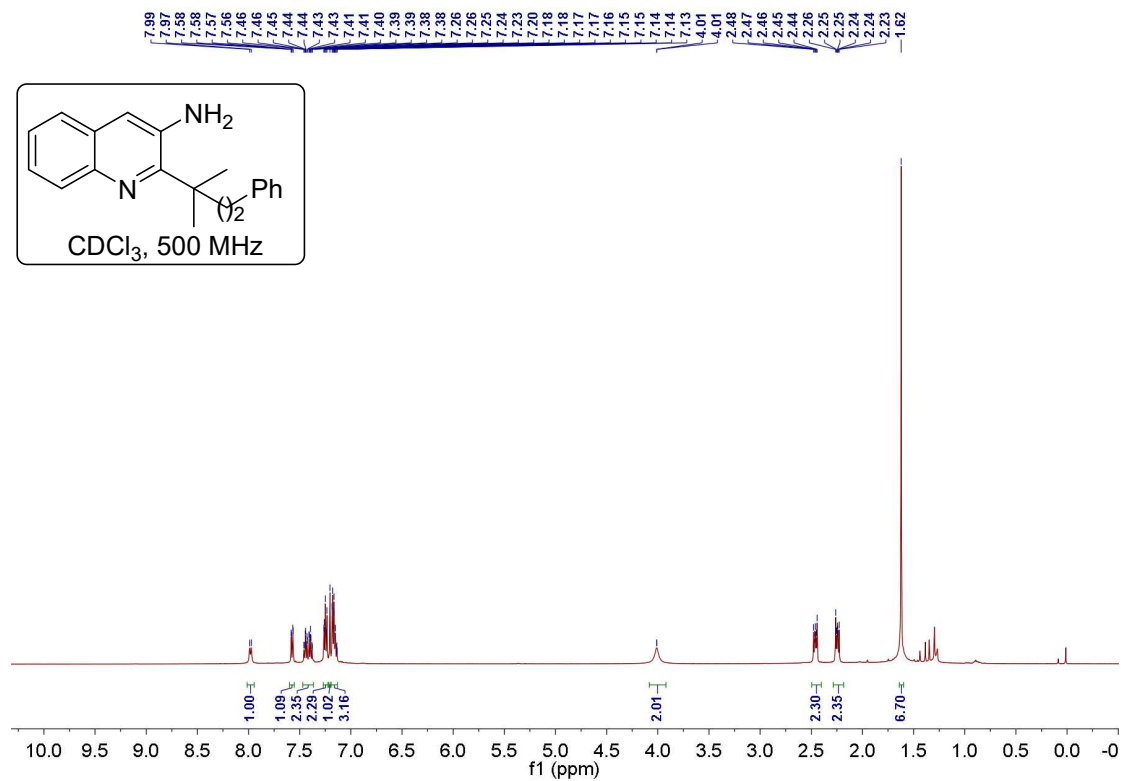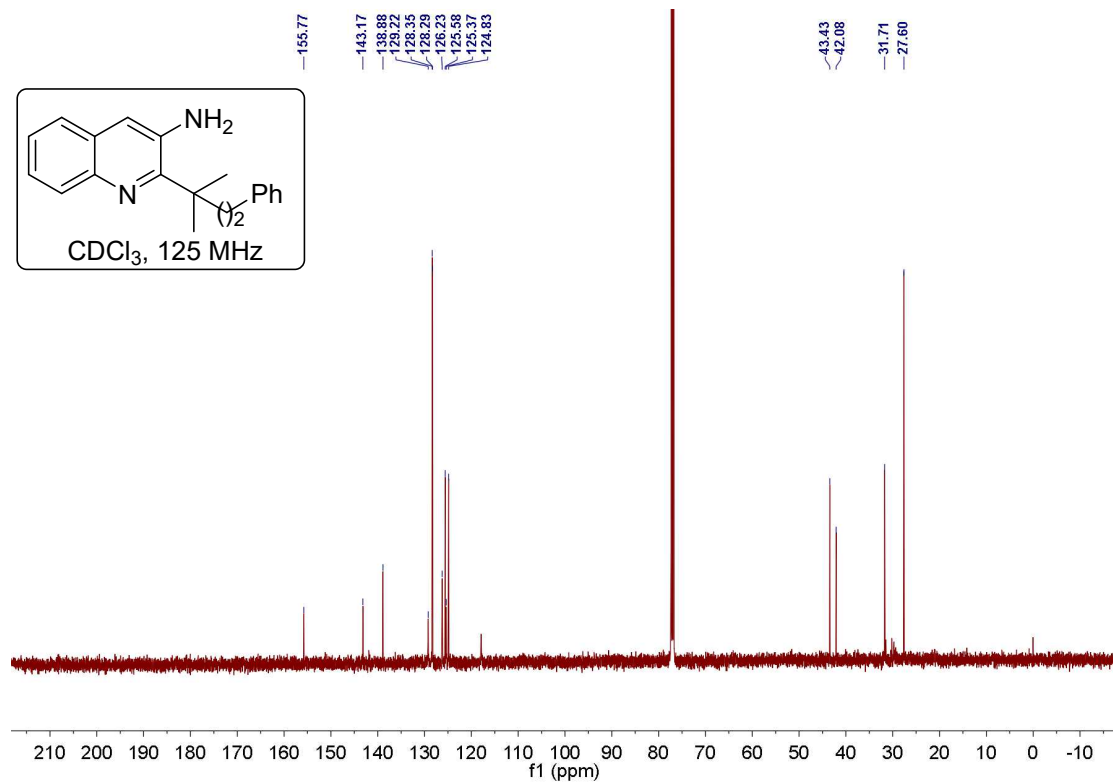

### 2-hexylquinolin-3-amine(3p)

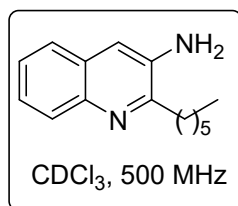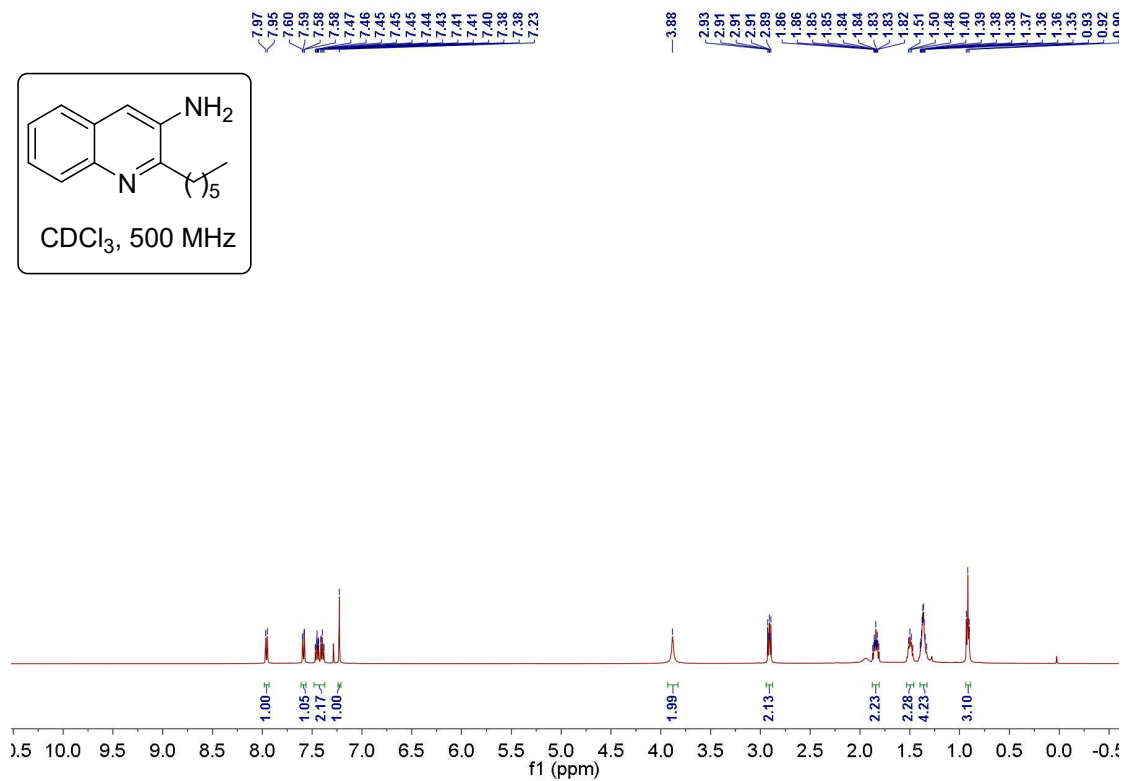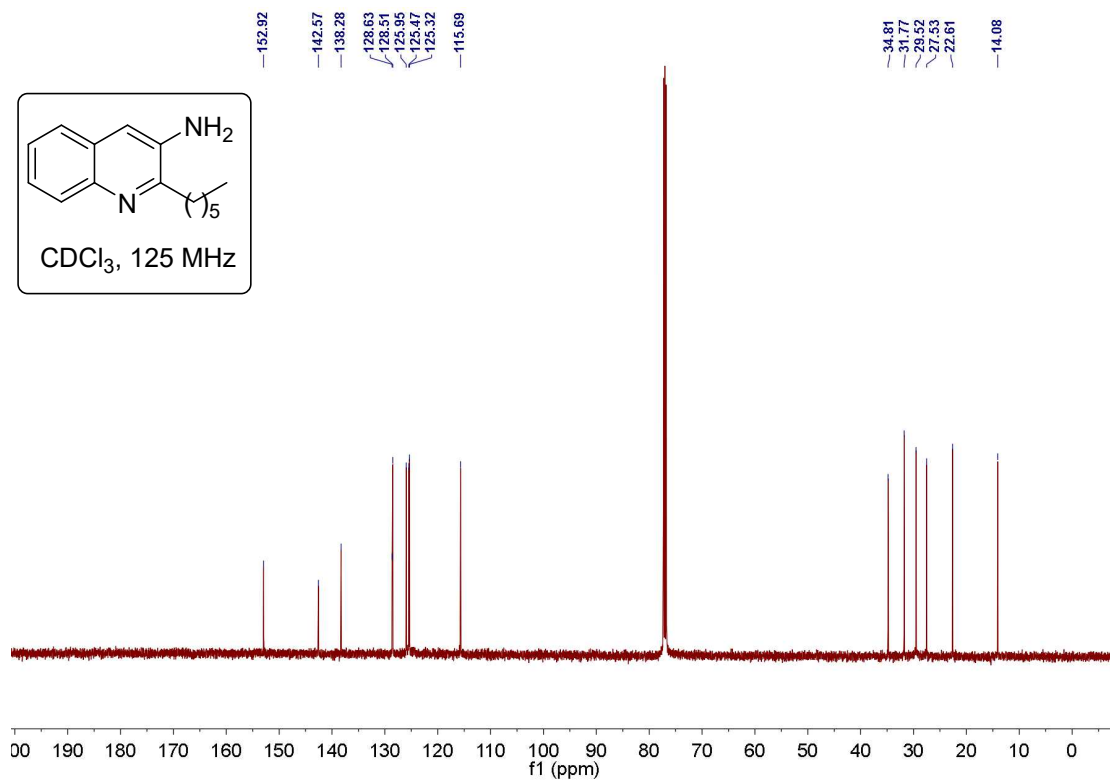

2-(3,3,3-trifluoropropyl)quinolin-3-amine (3q)

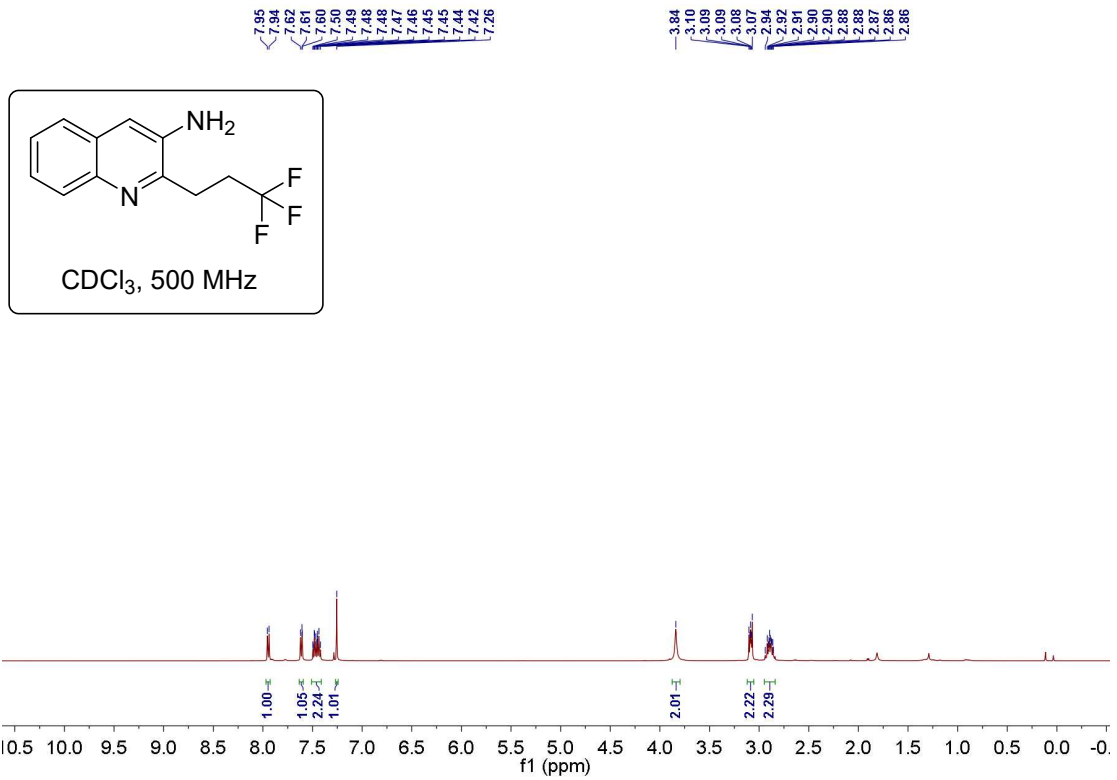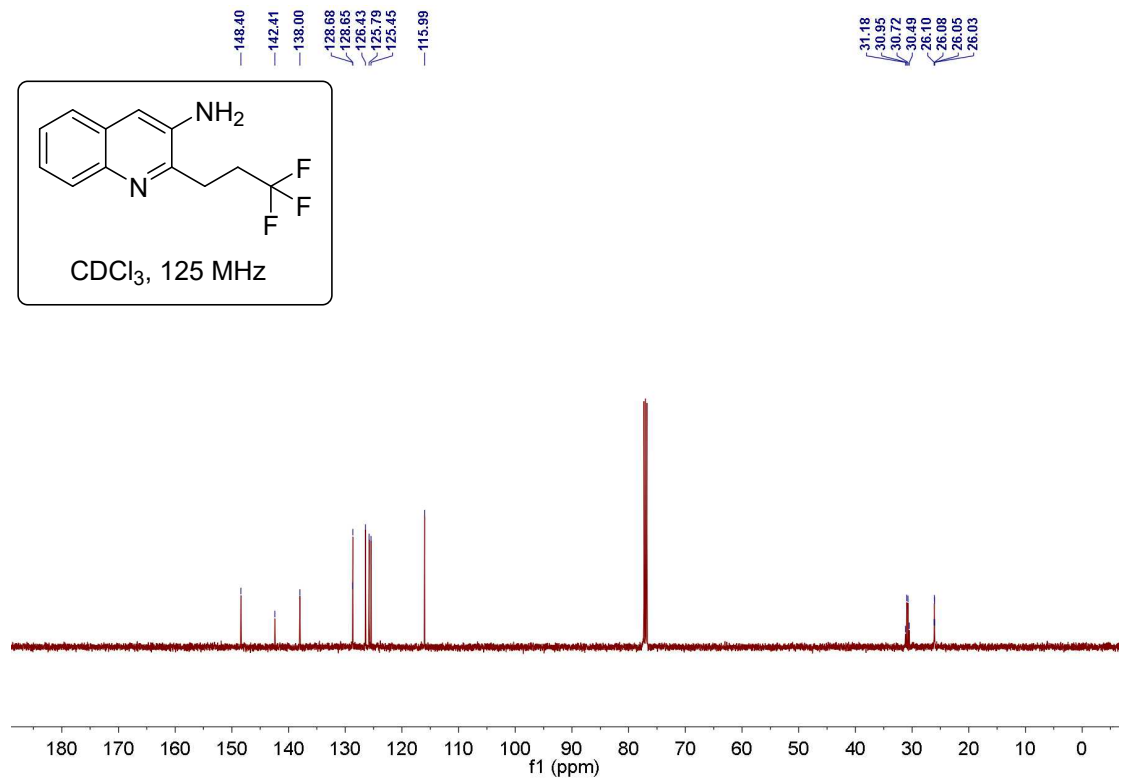

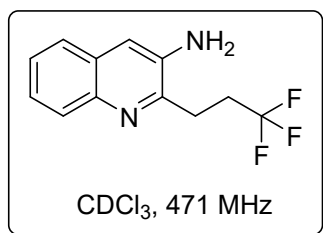

—65.38

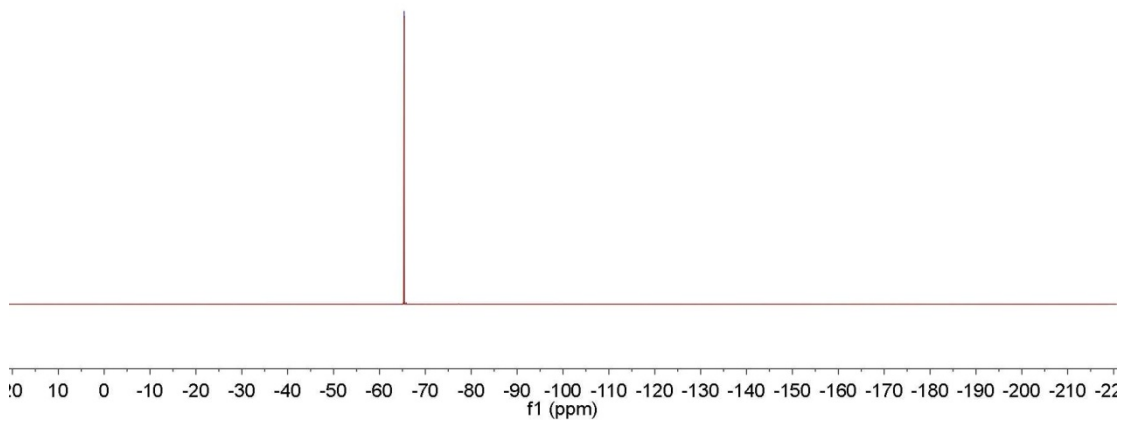

### 2-ethylquinolin-3-amine (3r)

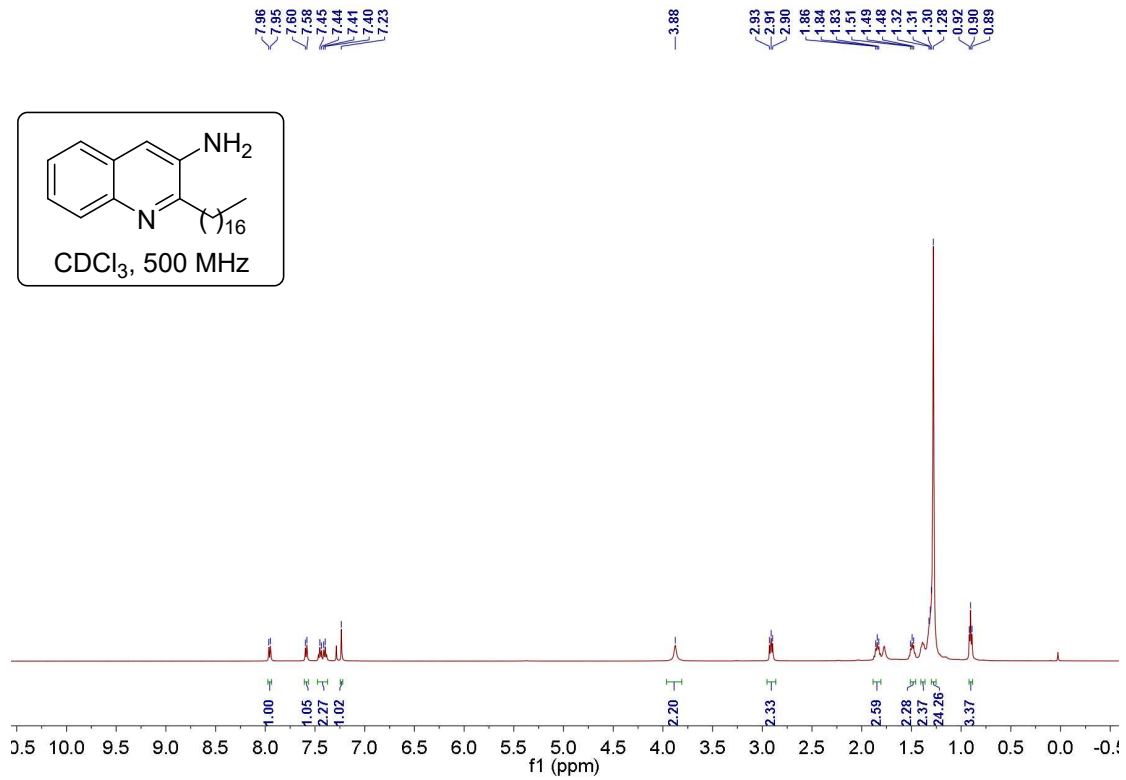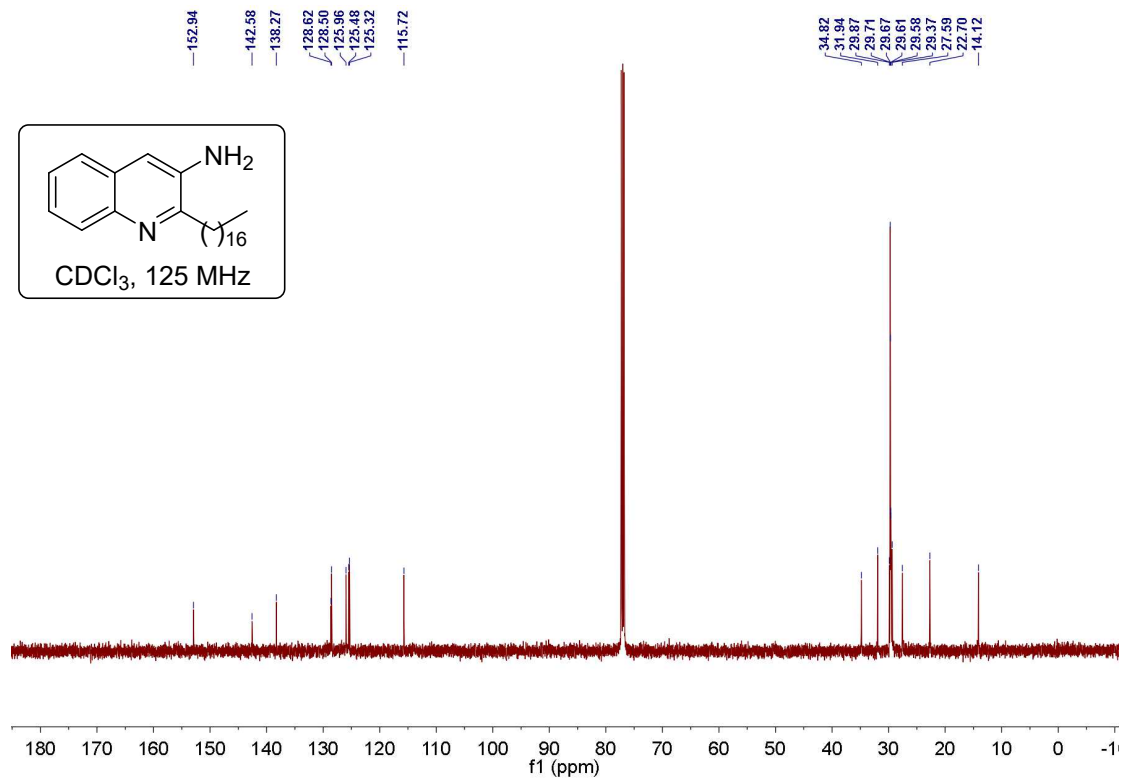

2-(adamantan-1-yl)quinolin-3-amine (3s)

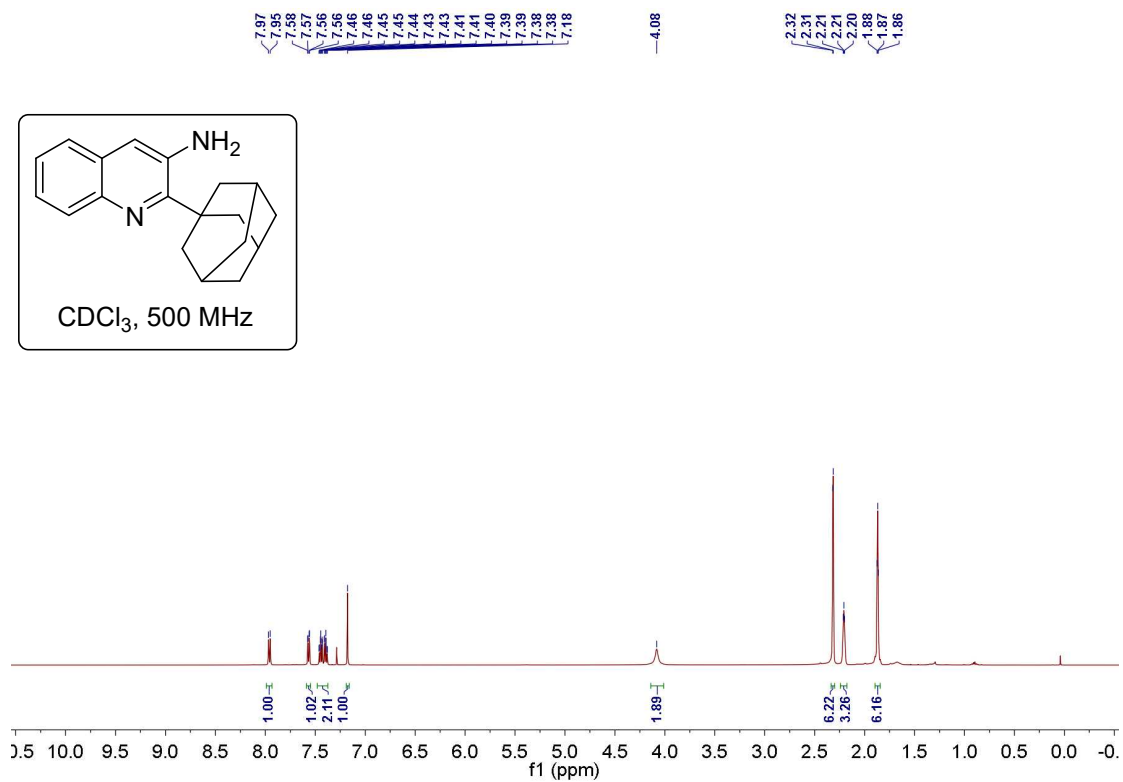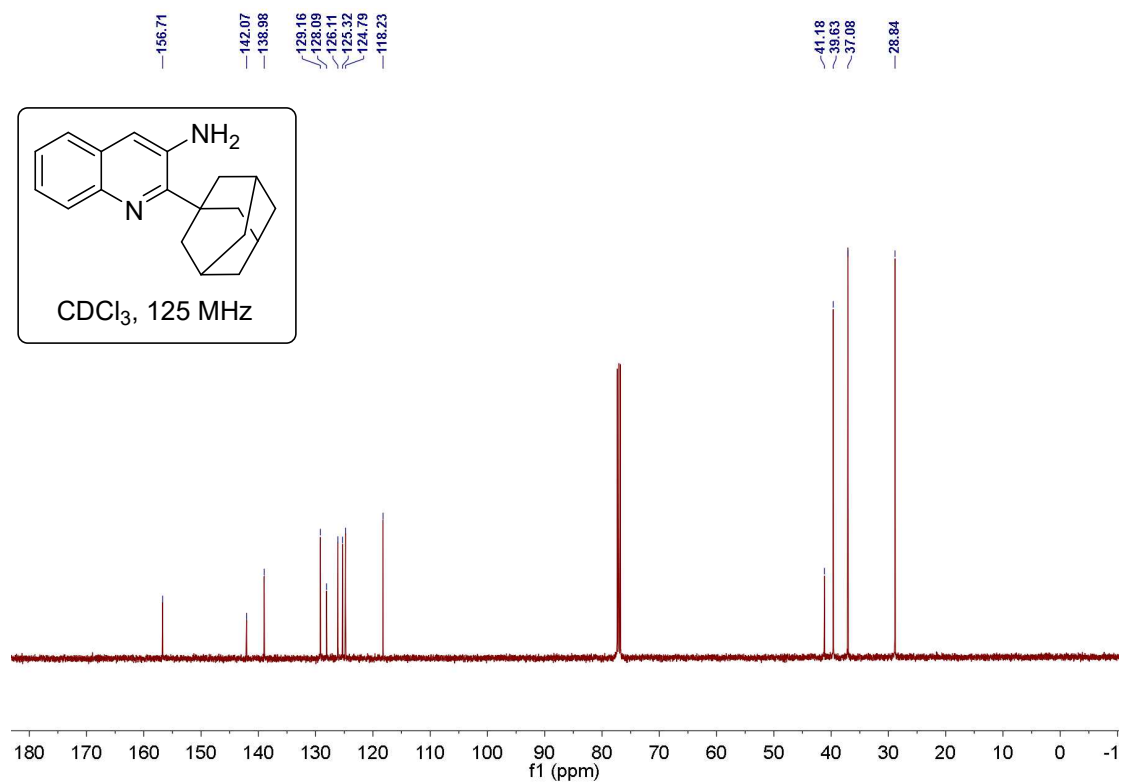

## 2-(adamantan-1-ylmethyl)quinolin-3-amine(3t)

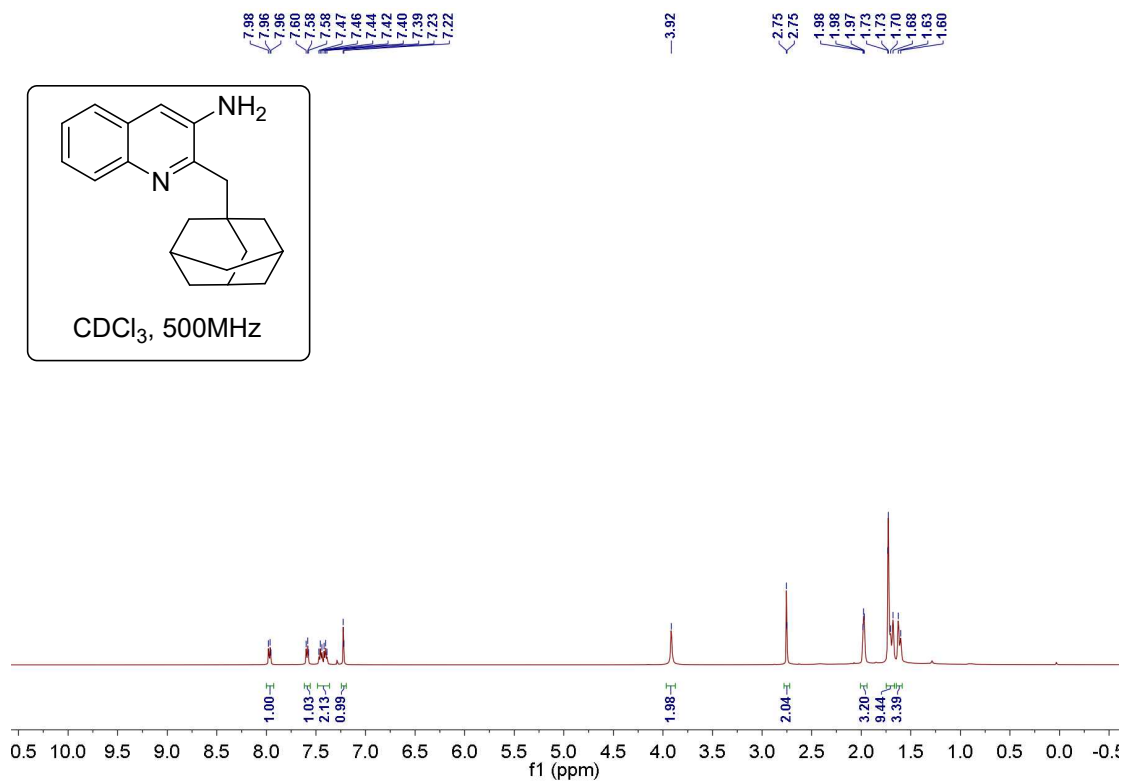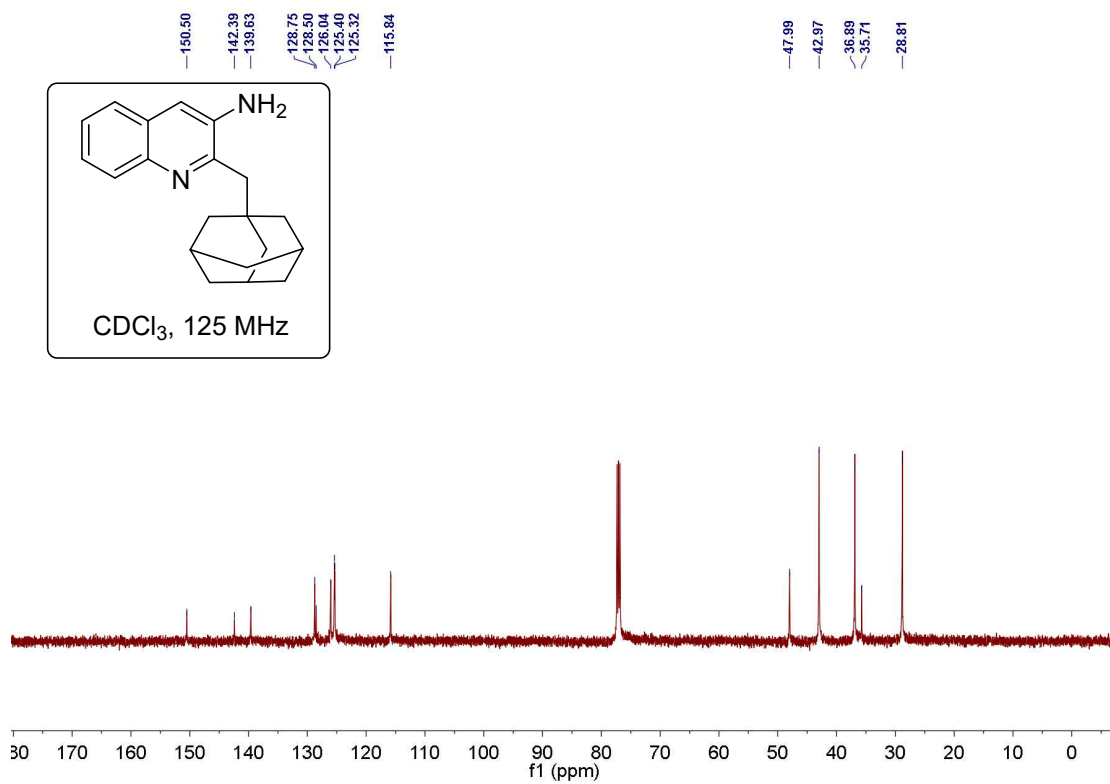

tert-butyl 4-(3-aminoquinolin-2-yl)piperidine-1-carboxylate (3u)

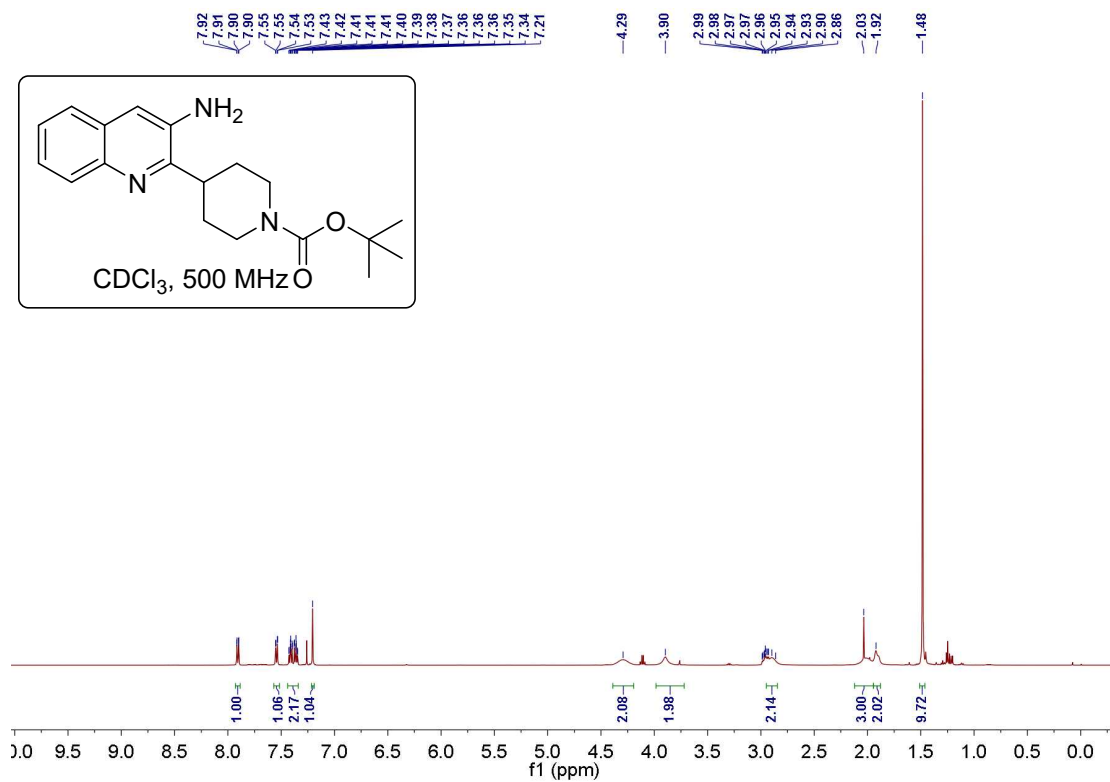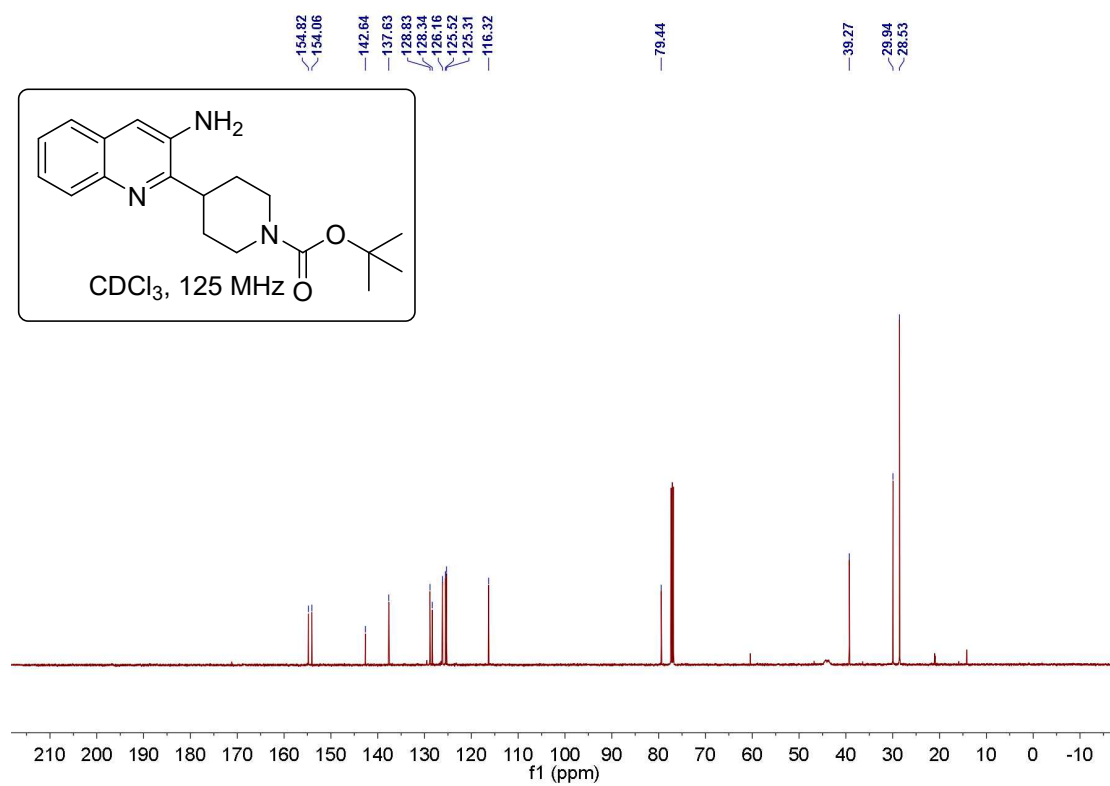







## 2-cyclohexyl-6-methoxyquinolin-3-amine (4a)

Ju101-2021msq-683hc, 1, f1d

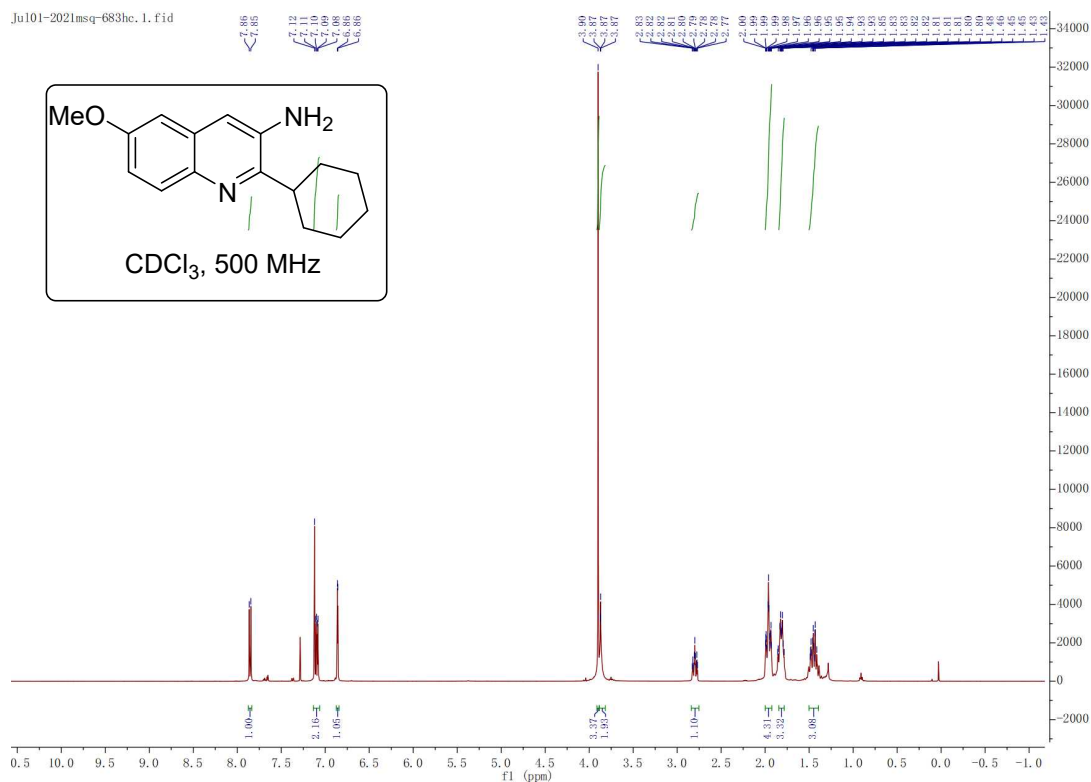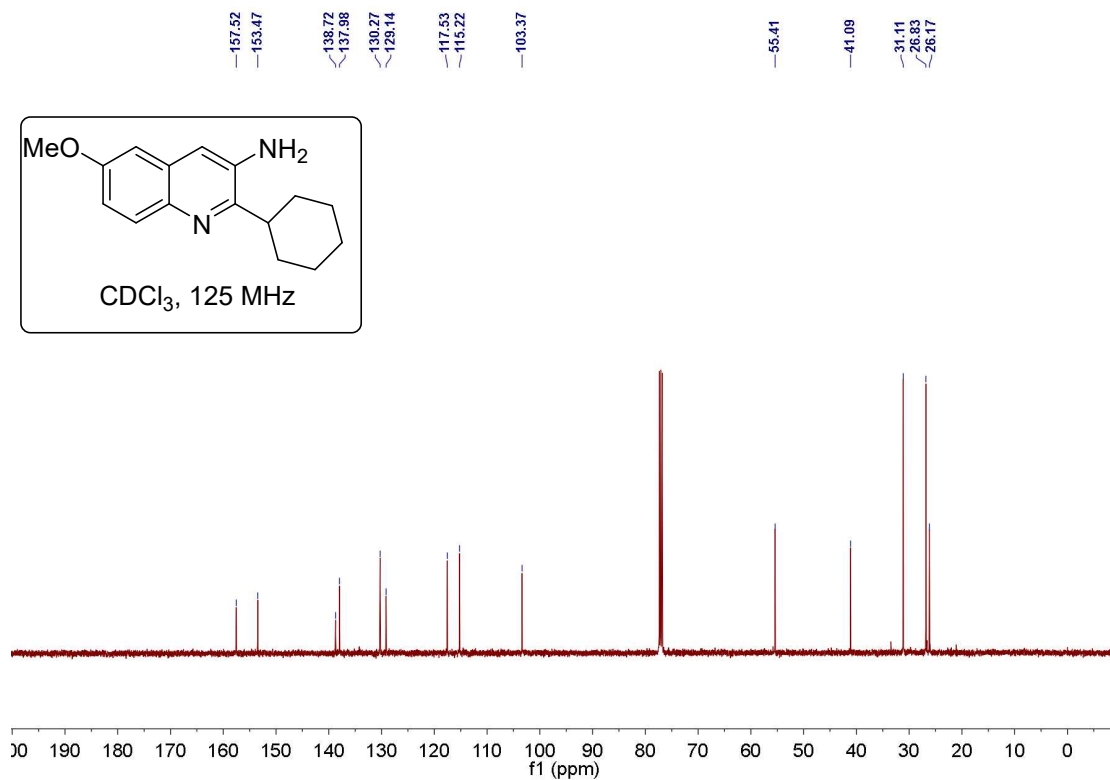

### 5-chloro-2-cyclohexylquinolin-3-amine(4b)

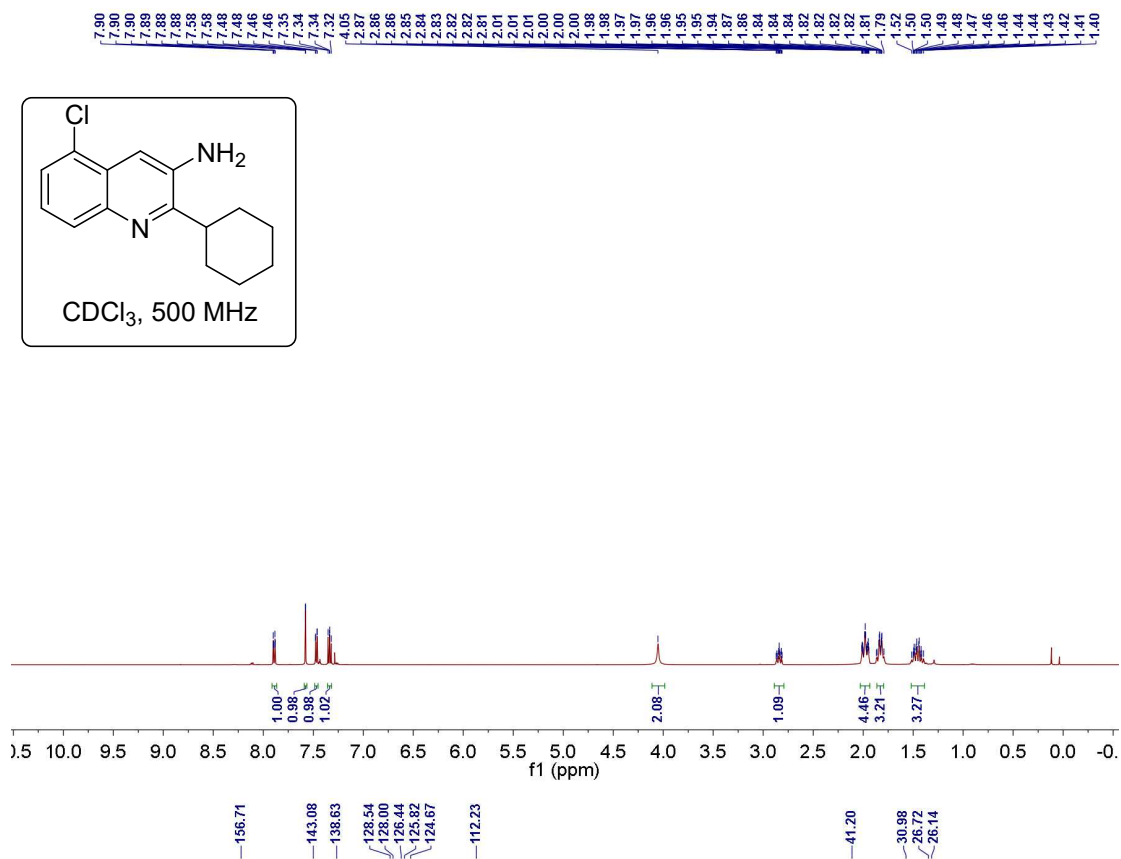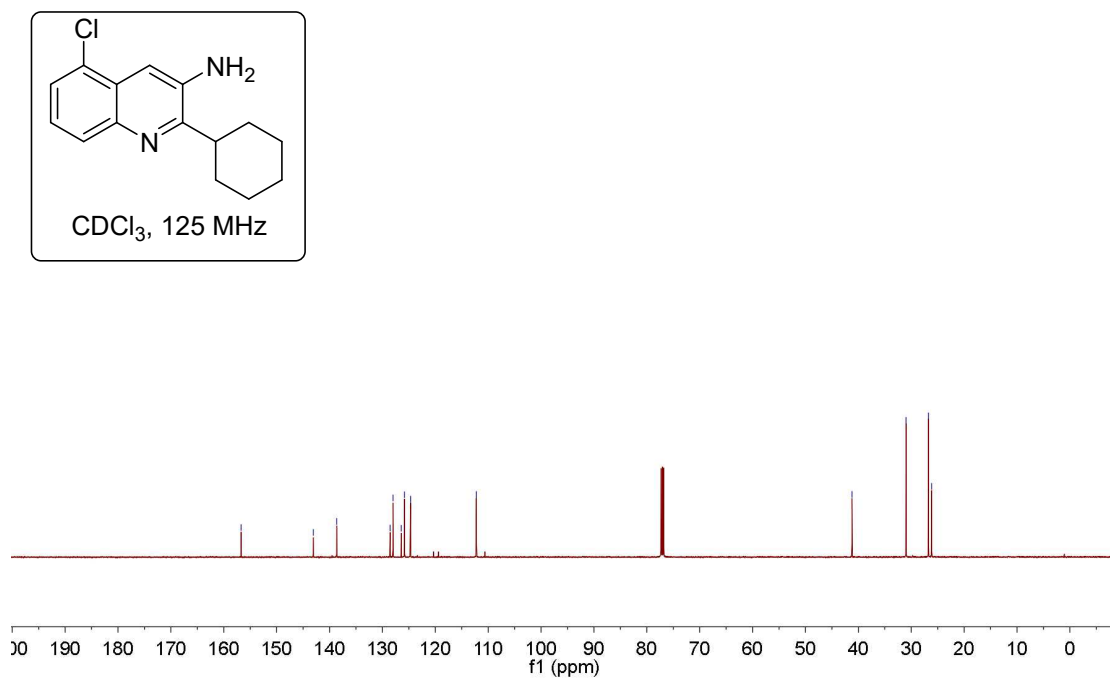

### 6-chloro-2-cyclohexylquinolin-3-amine(4c)

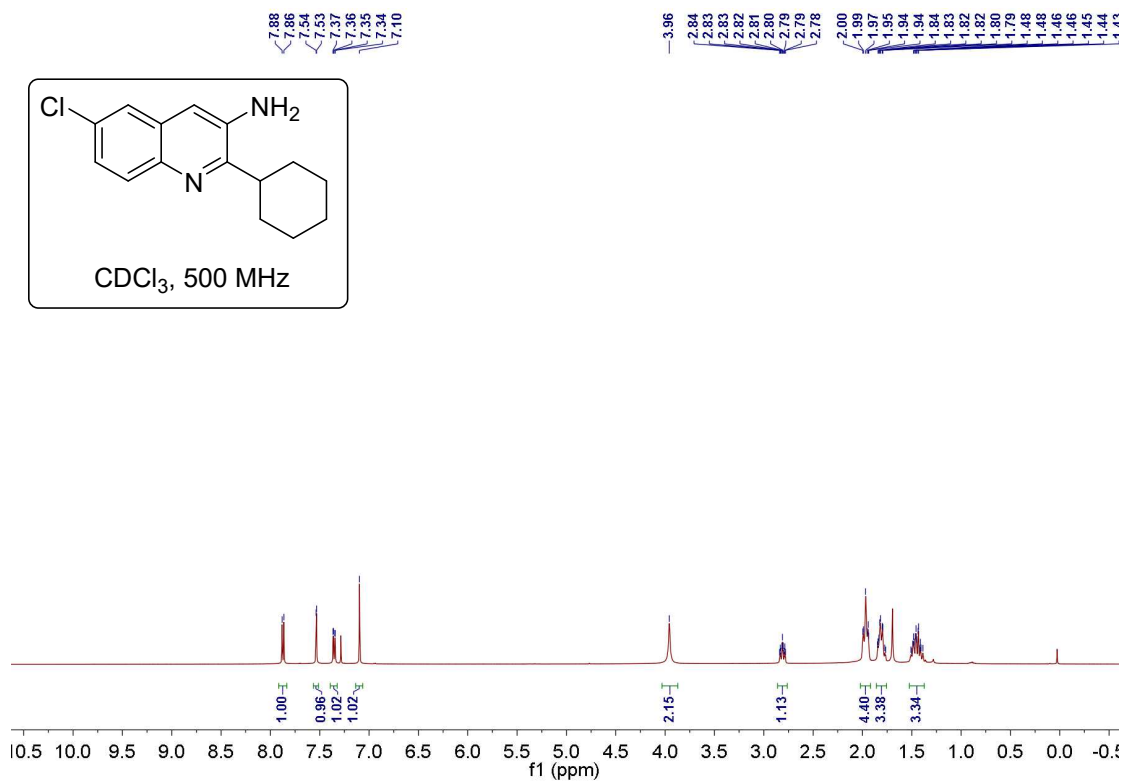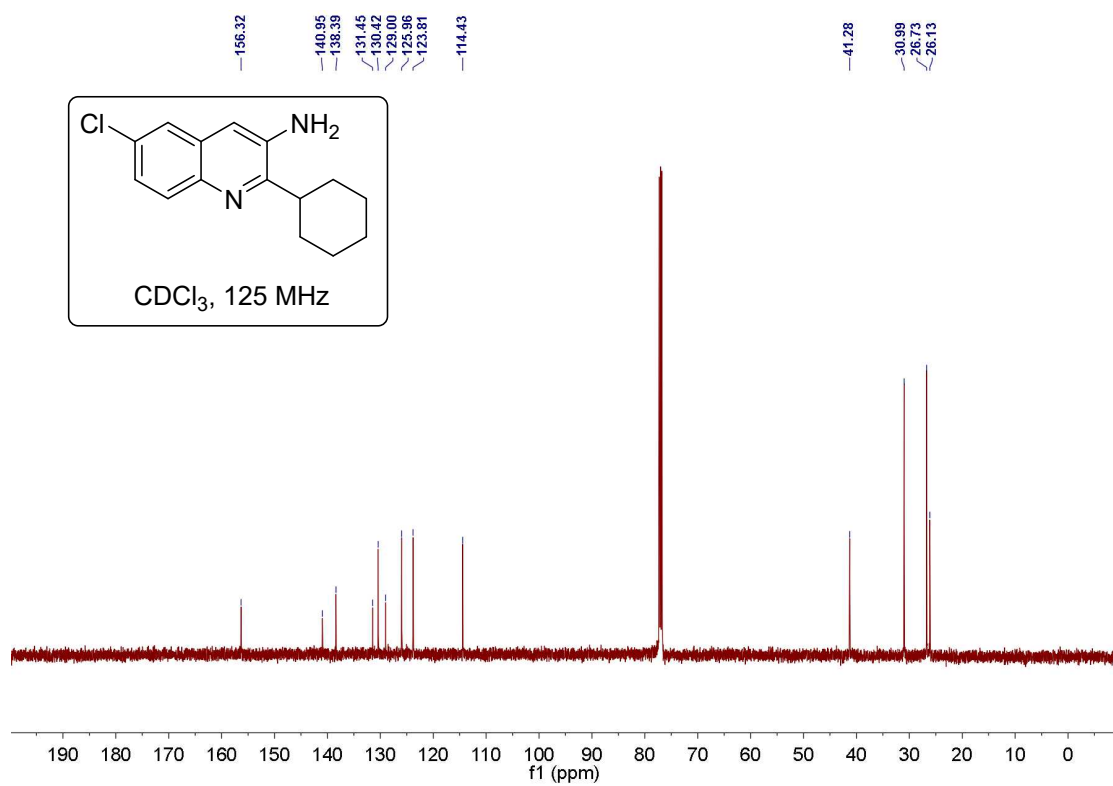

7-chloro-2-cyclohexylquinolin-3-amine(4d)

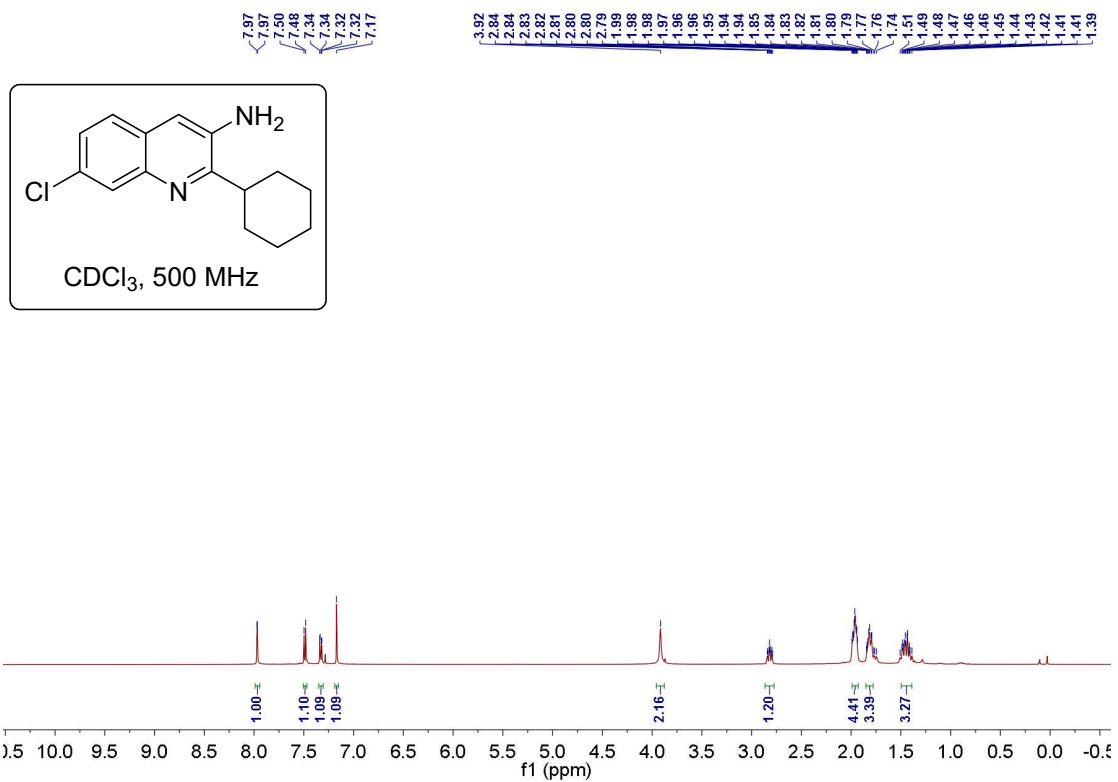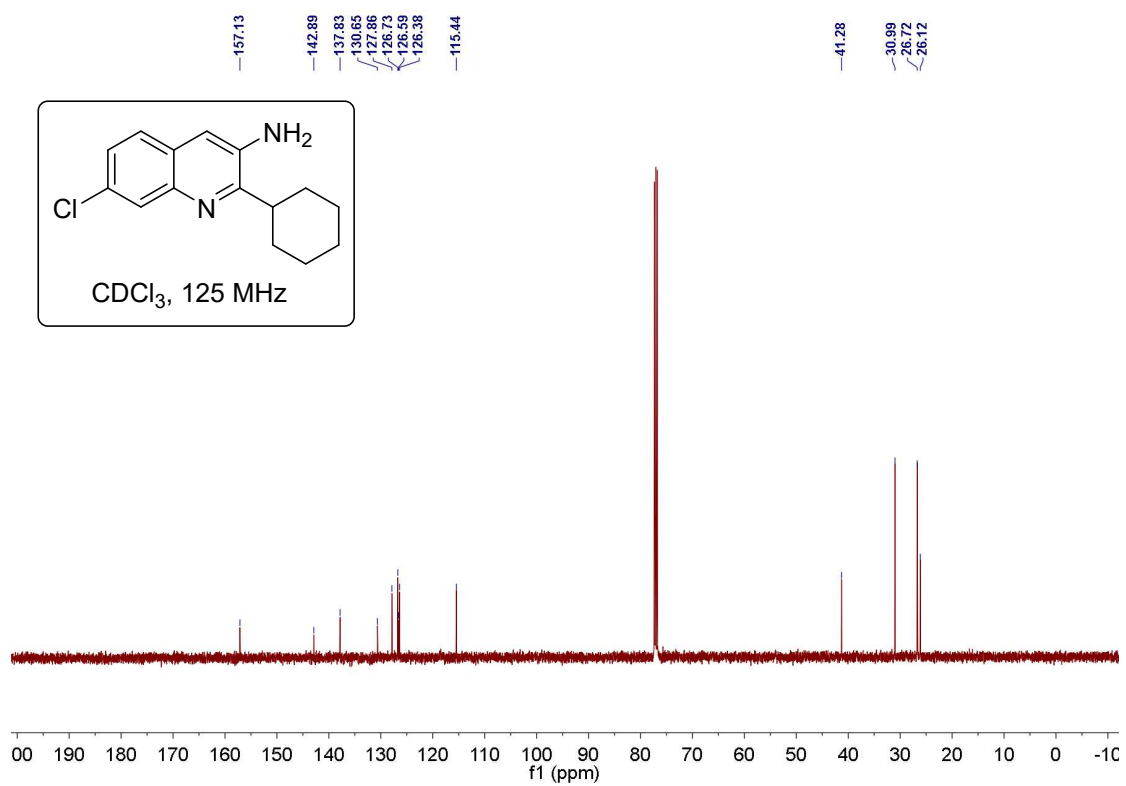

## 2-cyclohexyl-4-methylquinolin-3-amine(4e)

7.99  
7.99  
7.98  
7.98  
7.97  
7.97  
7.85  
7.85  
7.84  
7.84  
7.83  
7.83  
7.46  
7.46  
7.45  
7.45  
7.44  
7.44  
7.44  
2.87  
2.86  
2.85  
2.84  
2.84  
2.46  
2.45  
2.45  
2.02  
2.02  
2.01  
2.01  
2.01  
2.00  
2.00  
2.00  
1.99  
1.99  
1.99  
1.98  
1.98  
1.97  
1.97  
1.96  
1.95  
1.95  
1.95  
1.89  
1.88  
1.88  
1.87  
1.87  
1.85  
1.85  
1.84  
1.84  
1.83  
1.83  
1.82  
1.82  
1.82  
1.81  
1.81  
1.51  
1.50  
1.50  
1.49  
1.48  
1.48  
1.46  
1.46  
1.44

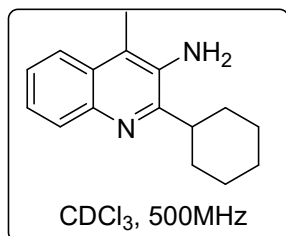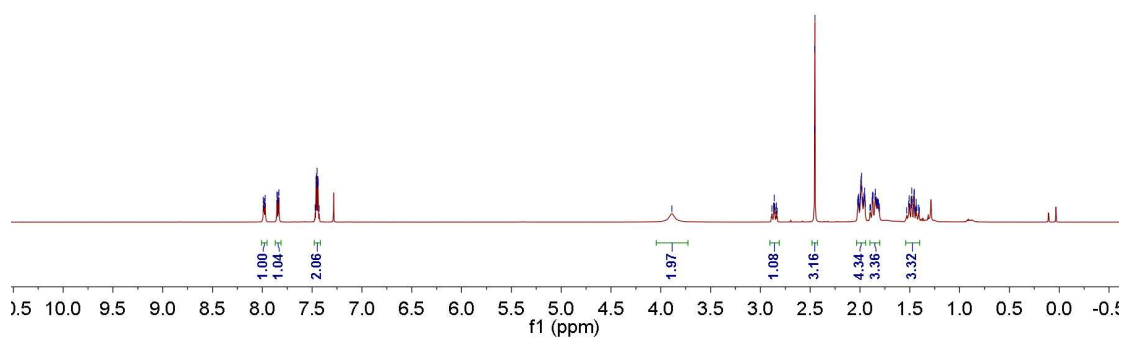

155.07  
142.33  
135.21  
129.66  
127.48  
125.59  
124.84  
122.05  
120.78

41.65  
31.10  
26.85  
26.19

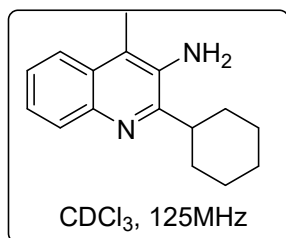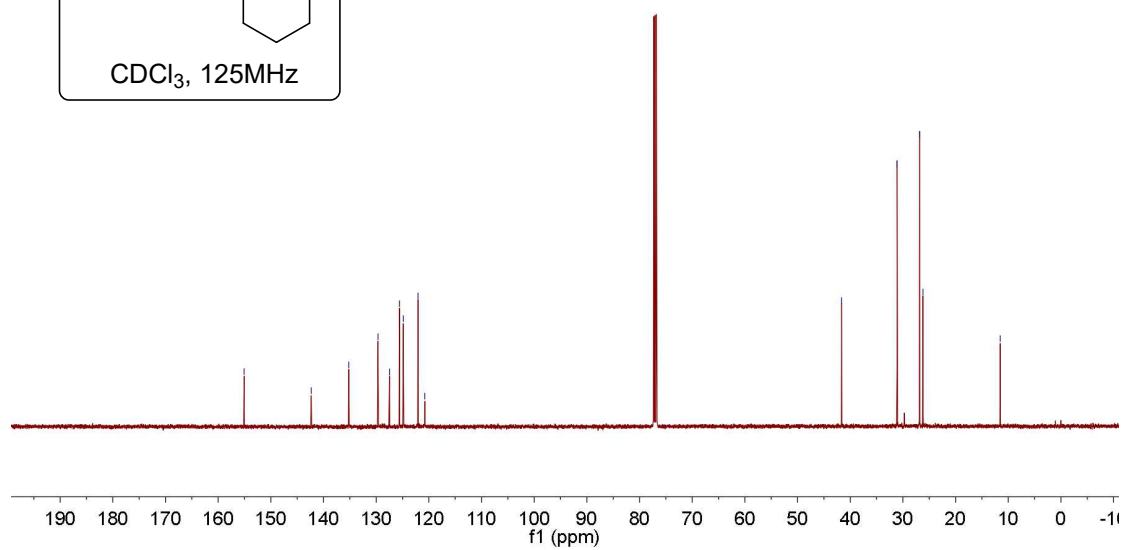

### 6-chloro-2-(1-methylcyclopropyl)quinolin-3-amine(4f)

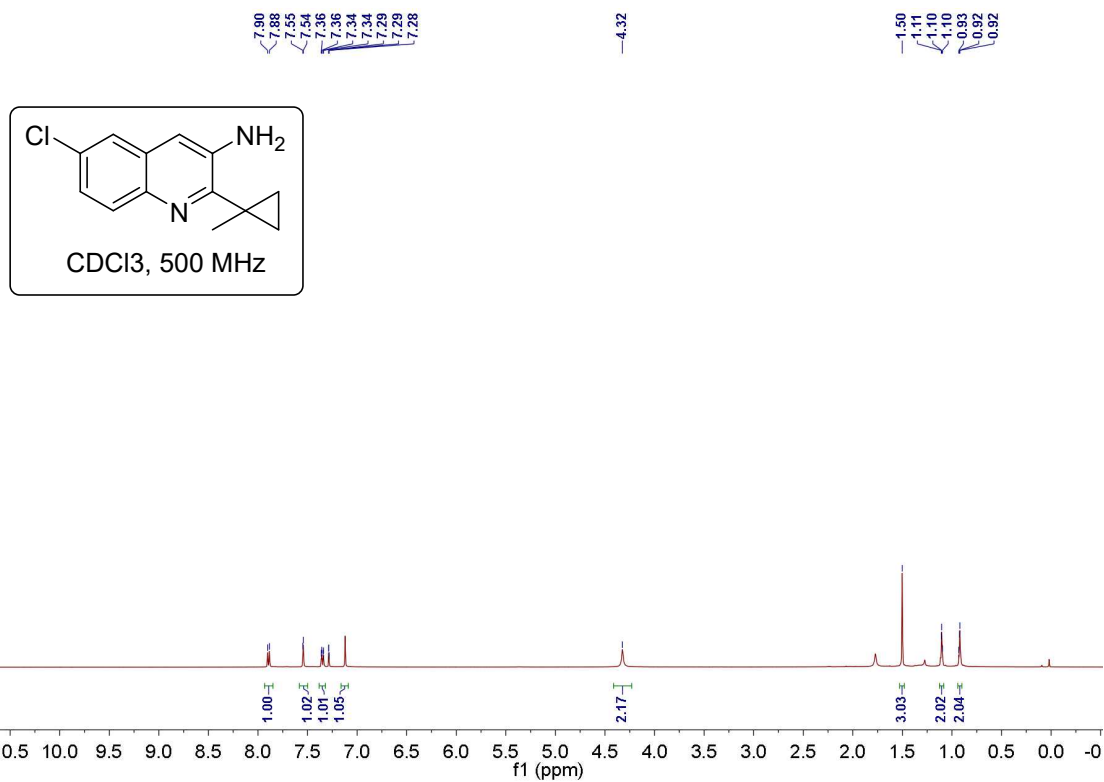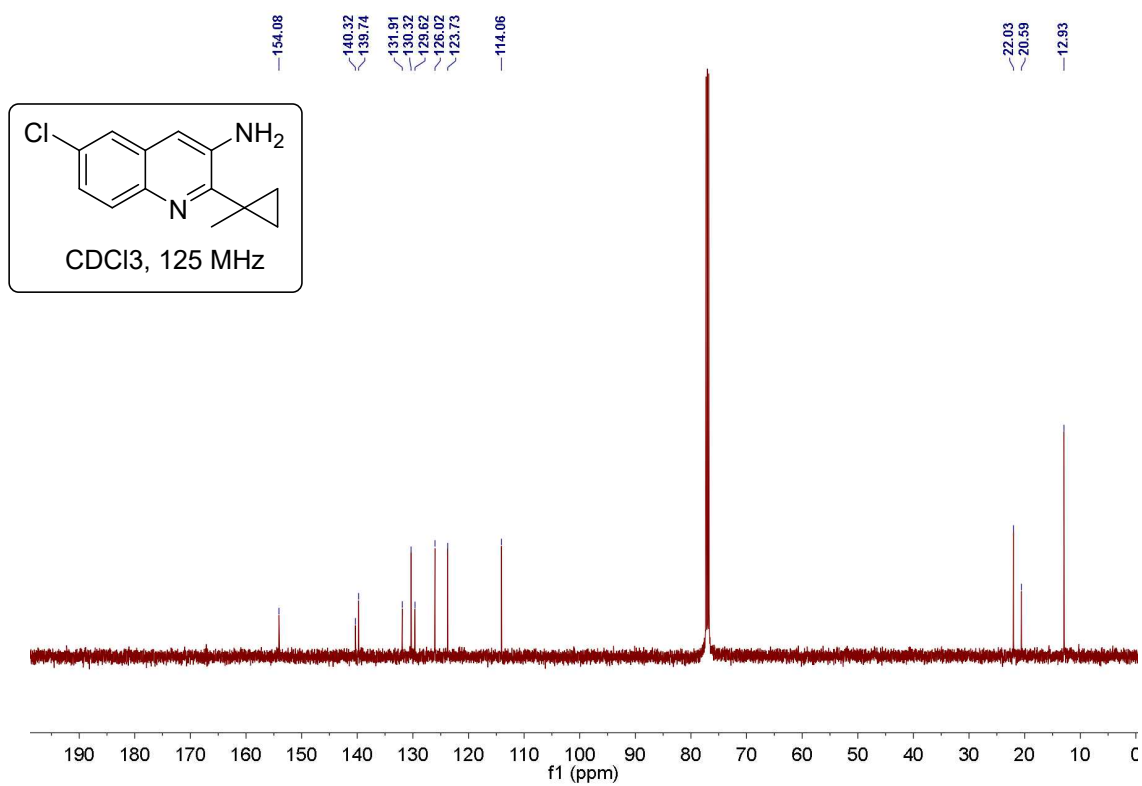



# 6-chloro-2-(4-methyltetrahydro-2H-pyran-4-yl)quinolin-3-amine (4g)

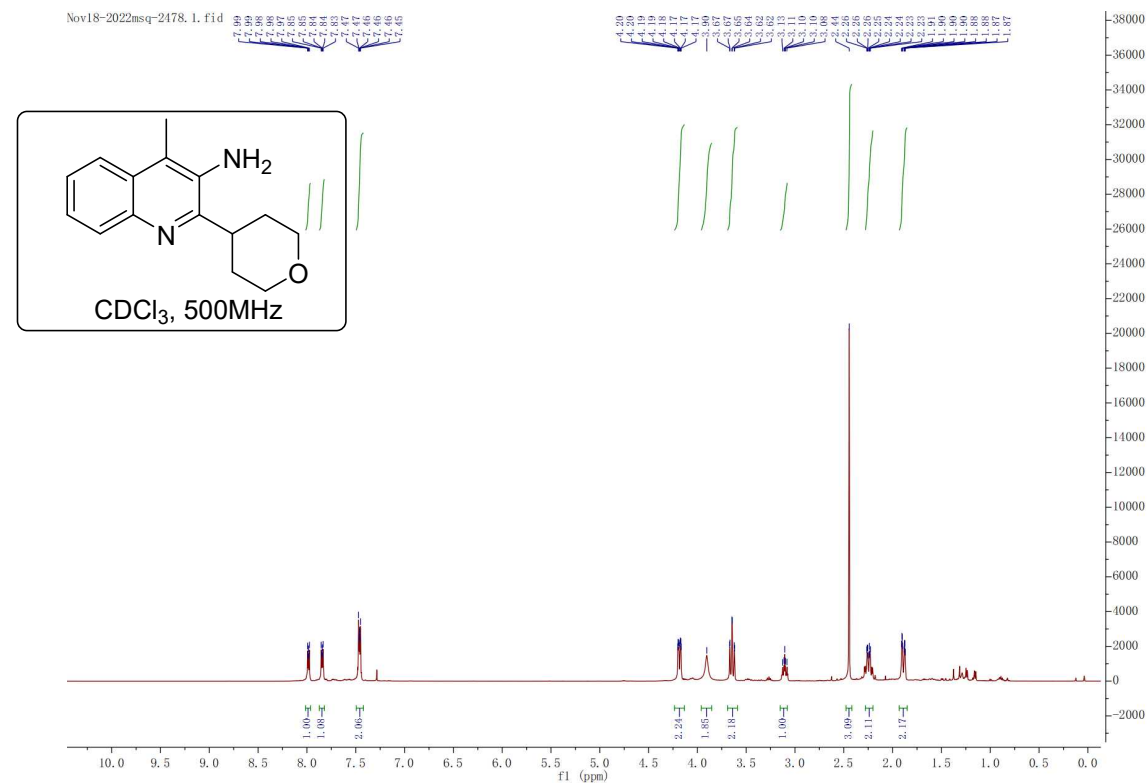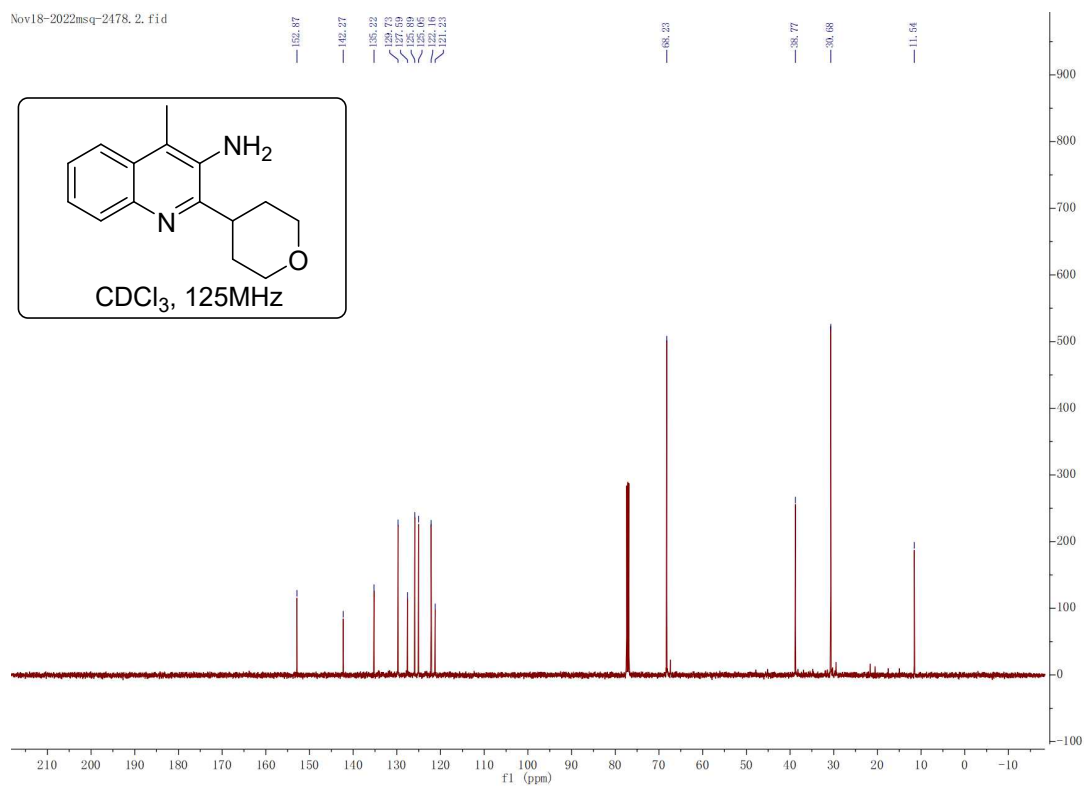

**tert-butyl 4-(3-amino-6-chloroquinolin-2-yl)-4-methylpiperidine-1-carboxylate (4h)**

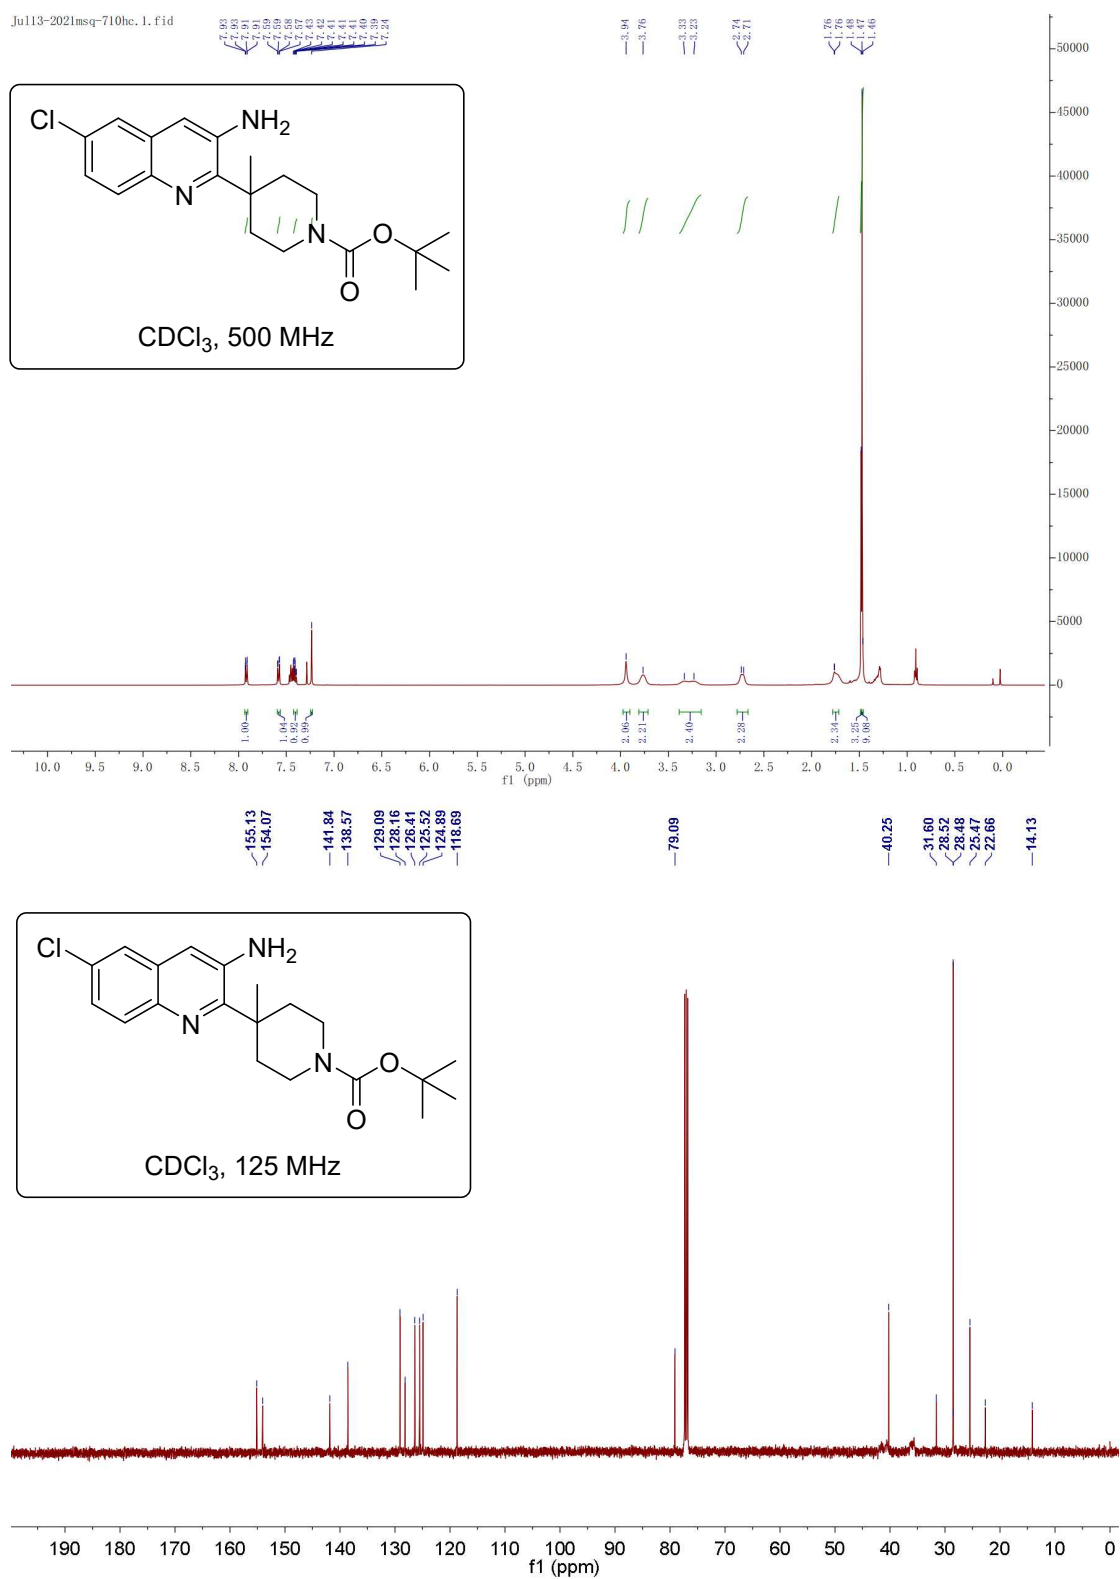

### 3-azido-2-cyclohexylquinoline (5a)

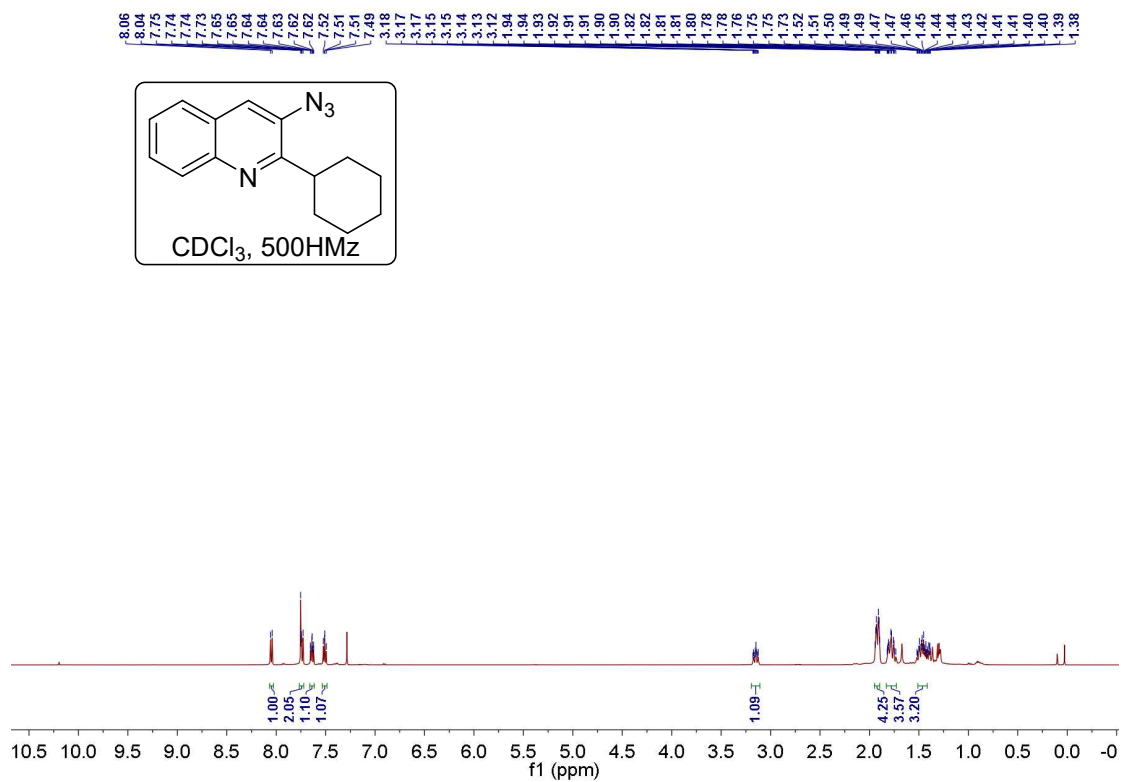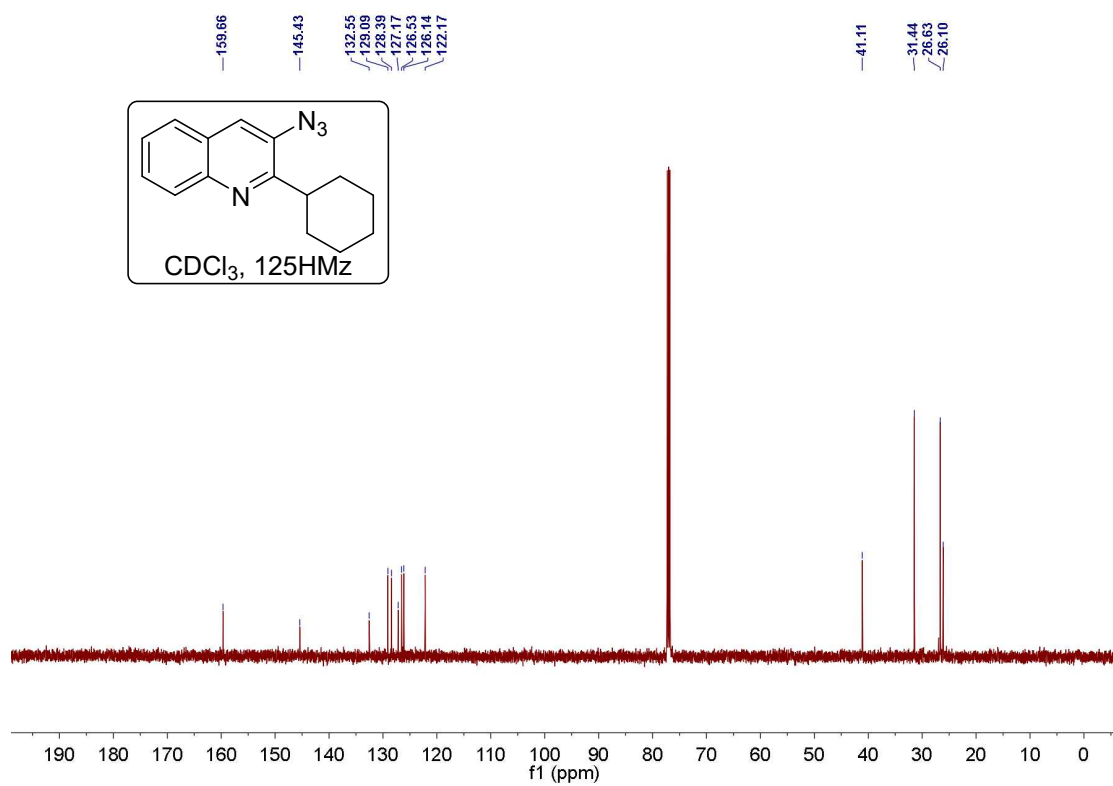

2-cyclohexyl-3-iodoquinoline (5b)

8.61 8.05 8.03 7.71 7.71 7.70 7.70 7.69 7.68 7.68 7.67 7.66 7.65 7.65 7.50 7.49 7.49 7.47 7.47 3.31 3.31 3.30 3.29 3.28 3.28 3.27 3.27 3.04 3.04 2.03 2.03 2.01 2.00 2.00 1.96 1.96 1.95 1.95 1.93 1.93 1.92 1.84 1.84 1.83 1.83 1.82 1.82 1.81 1.81 1.80 1.79 1.79 1.77 1.76 1.74 1.74 1.72 1.72 1.55 1.55 1.52 1.52 1.50 1.50 1.49 1.49 1.48 1.48 1.47 1.47 1.44 1.44 1.42 1.42 1.41 1.41 1.39 1.38

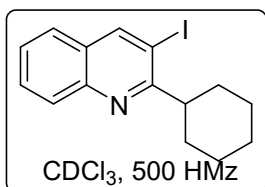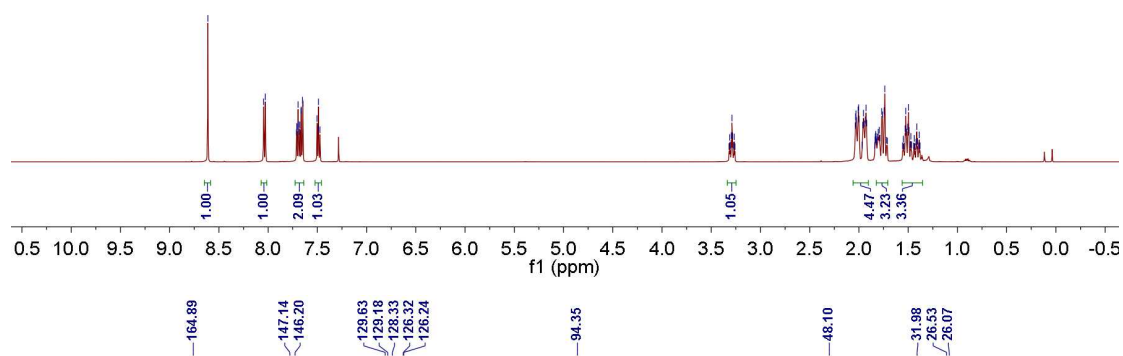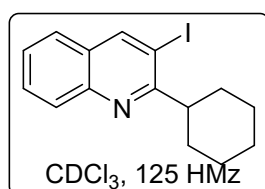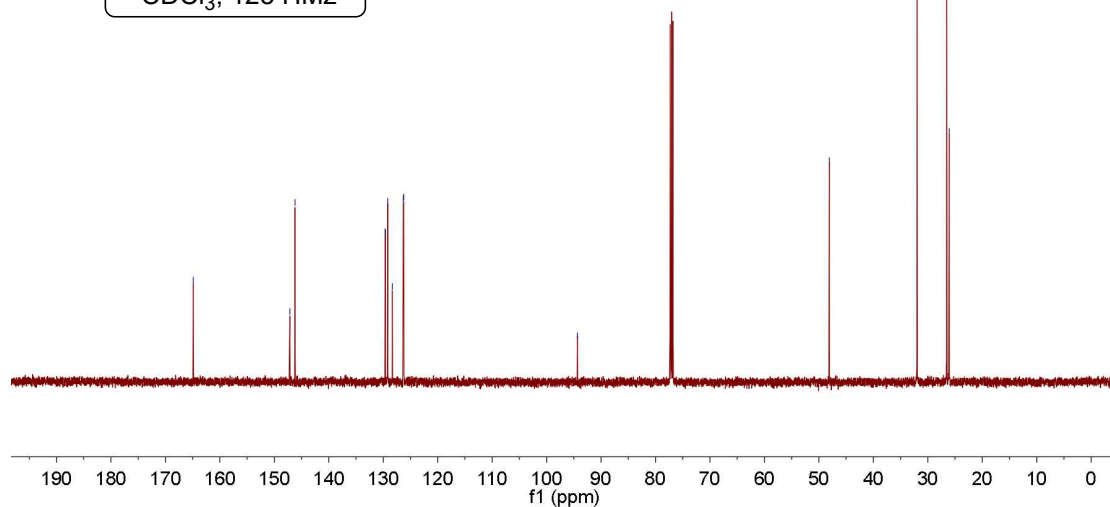

Supplement: d3qo00537b1.pdf [file d3qo00537b1.pdf]
